# Supplementary material for: Multi-Dimensional Flow Cytometry Analyses Reveal a Dichotomous Role for Nitric Oxide in Melanoma Patients Receiving Immunotherapy
Source: PubMed Central journal article supplement (PMC7052497; doi:10.3389/fimmu.2020.00164), 2020-02-25
Supplement: Data_Sheet_1.pdf [file Data_Sheet_1.pdf]

**A**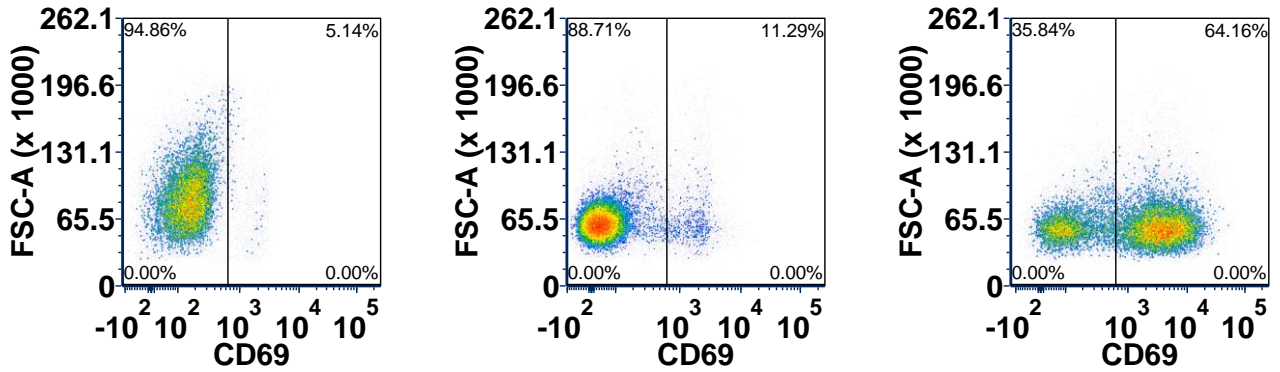**B**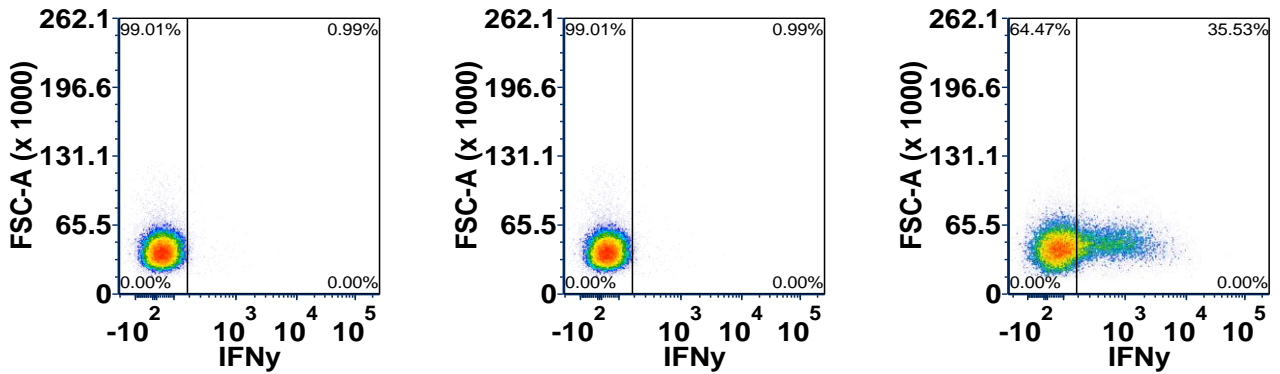

**Fig. S1. Positive control for CD69 and IFN- $\gamma$ .** (A) CD69 unstained (left) live human PBMCs. Stained (middle) with anti-CD69-APC-R700, unstimulated PBMCs and (right) stained with anti-CD69-APC-R700 after 72 hrs. stimulation with PHA (5  $\mu$ g/ml). (B) IFN- $\gamma$  (left) unstained live human PBMCs. Stained (middle) with anti-IFN- $\gamma$ -BV786, unstimulated PBMCs and (right) stained with anti-IFN- $\gamma$ -BV786 after 24 hrs. stimulation with PMA (50 ng/ml) and Ionomycin (1  $\mu$ g/ml).

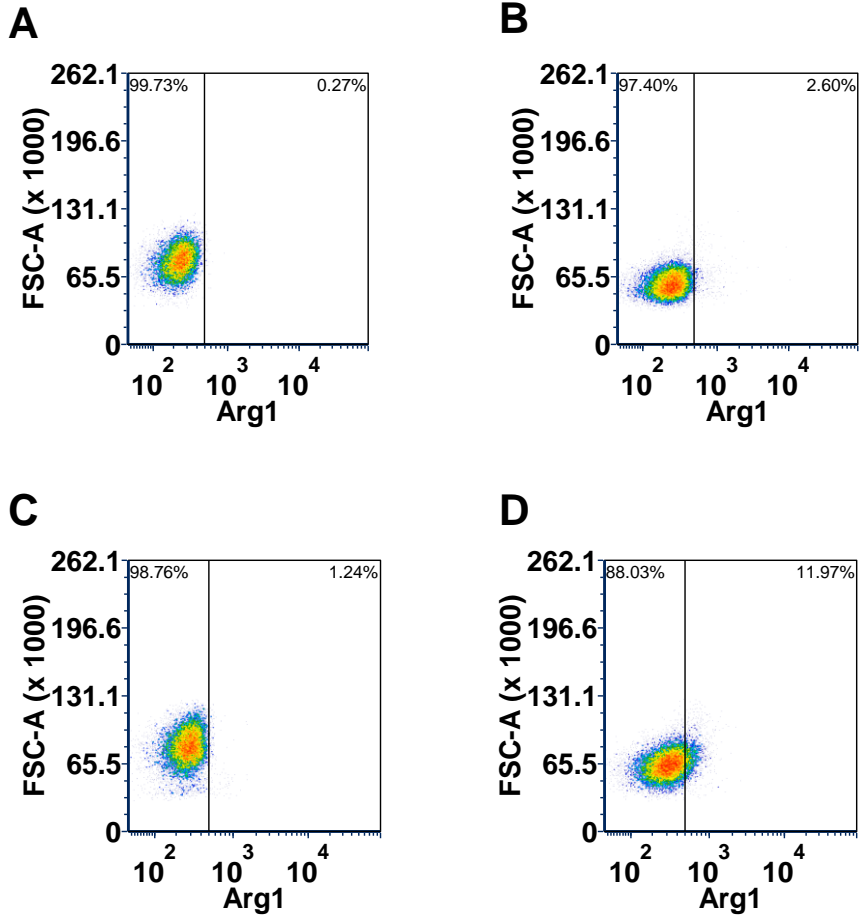

**Fig. S2. Positive control for Arginase 1.** (A) Unstained, unstimulated live human PBMCs. (B) Stained with anti-Arg1-PE, unstimulated PBMCs (C) Unstained, stimulated PBMCs. Stimulation with PHA (5  $\mu\text{g}/\text{ml}$ ) for 48 hrs. (D) Stained with anti-Arg1-PE, stimulated PBMCs.

**A**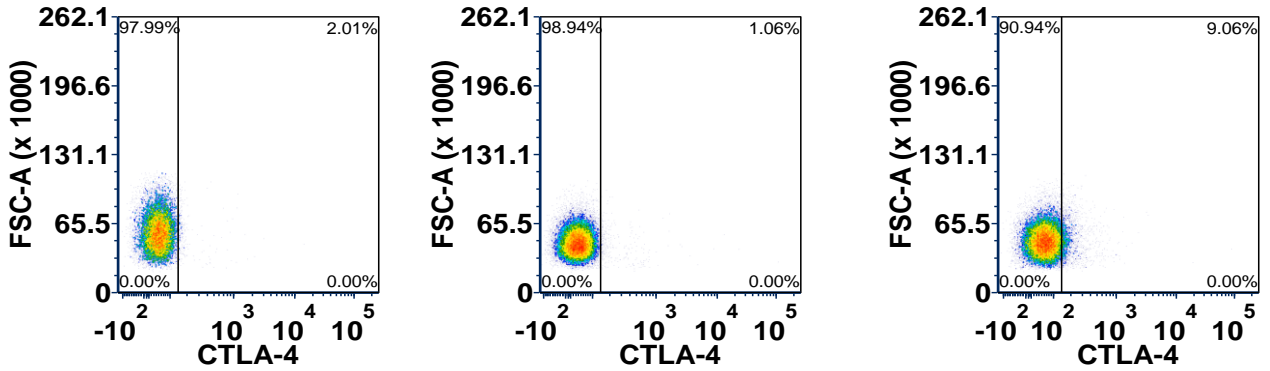**B**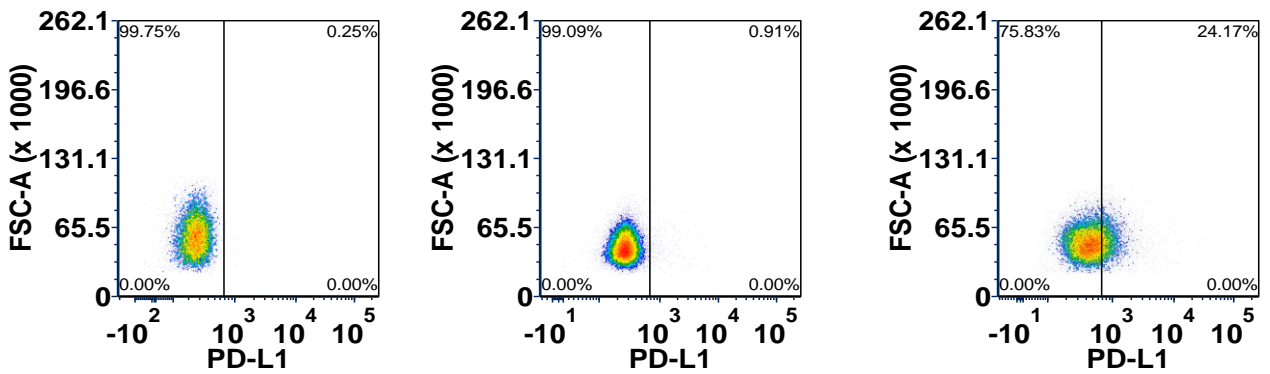

**Fig. S3. Positive control for CTLA-4 and PD-L1.** (A) CTLA4 (left) unstained live human PBMCs. Stained (middle) with anti-CTLA4-BV421, unstimulated PBMCs and (right) stained with anti-CTLA4-BV421 after 72 hrs. stimulation with PHA (5  $\mu$ g/ml). (B) PD-L1 (left) unstained live human PBMCs. Stained (middle) with anti-PD-L1-BB515, unstimulated PBMCs and (right) stained with anti-PD-L1-BB515 after 72 hrs. stimulation with PHA (5  $\mu$ g/ml).

**A**

CD8 Naïve or memory T cells

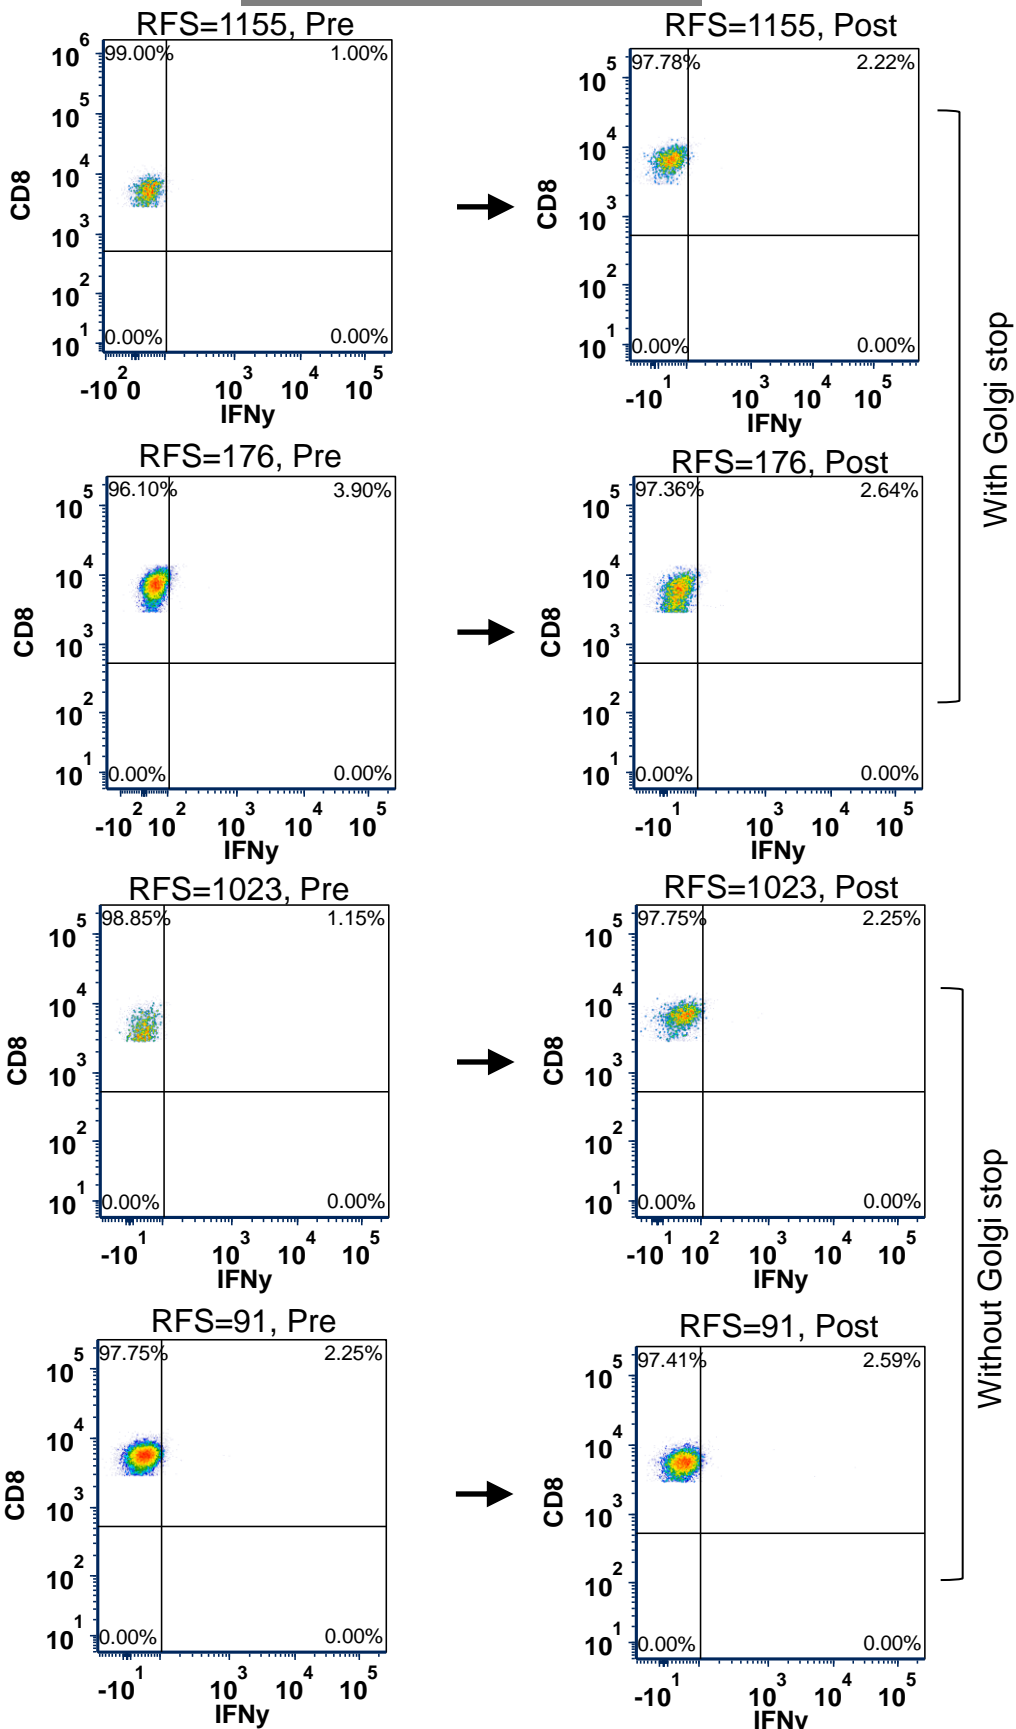

**Fig. S4. Negligible levels of IFN- $\gamma$  in patient PBMCs (without stimulation) irrelevant of golgi-stop treatment.** (A-B) illustrating pre and post levels of IFN- $\gamma$  from samples derived from patients with short and long RFS, respectively after PBMCs were processed with golgi-stop method. (C-D) illustrating pre and post IFN- $\gamma$  levels from samples derived from patients with short and long RFS, respectively after PBMCs were processed without the golgi-stop method.

**A**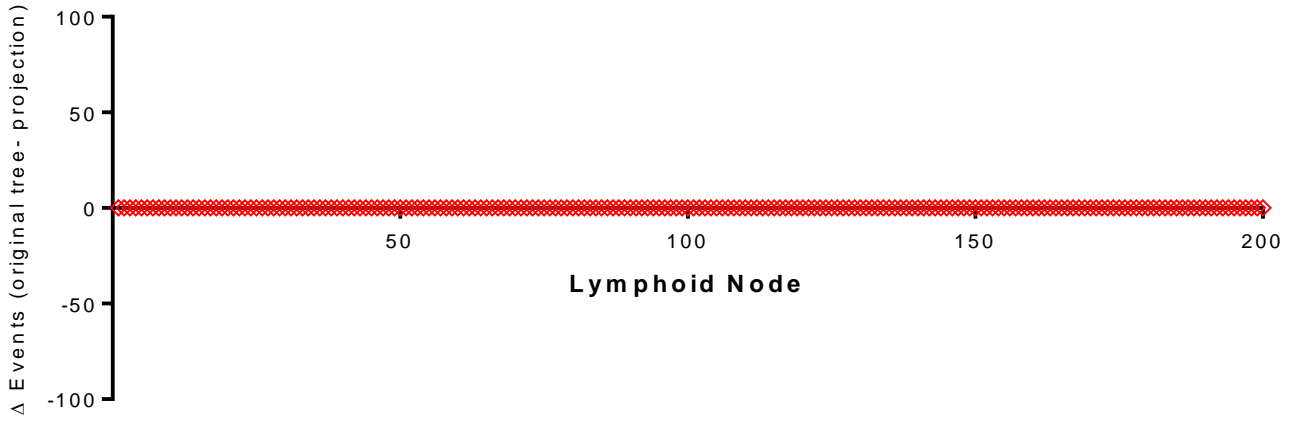**B**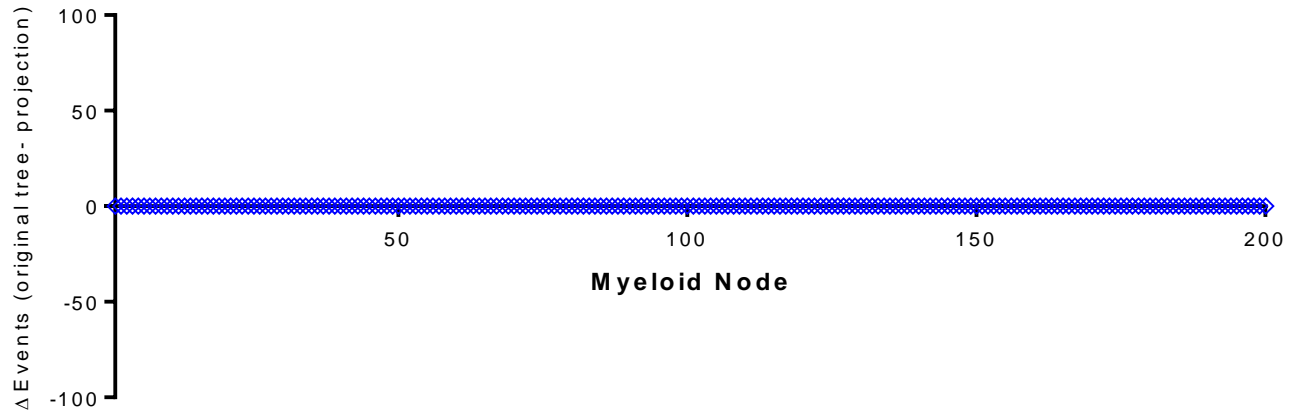

**Fig. S5. Projection of all 200 nodes on corresponding tree.** Differences in the number of events between the nodes of the original tree and the projections were calculated for the (A) Lymphoid, (B) Myeloid populations. Both the graphs indicate a perfect match between the number of events in the original nodes and the nodes calculated by the projection.

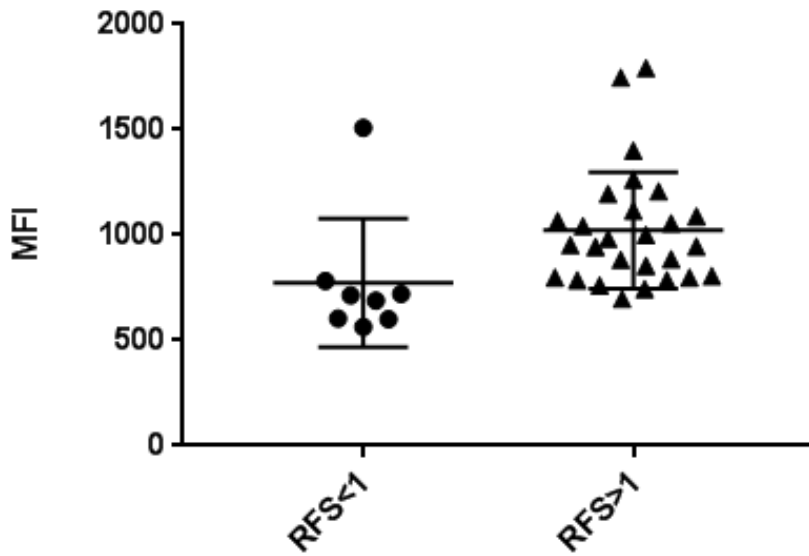

**Fig. S6. Phospho-STAT1 expression in patients with a RFS less than one year and with a RFS greater than one year. RFS > 1 (Mean = 1022.45, SD = 277.05); RFS ≤ 1yr (Mean = 773.12, SD = 306.18); p = 0.001.**

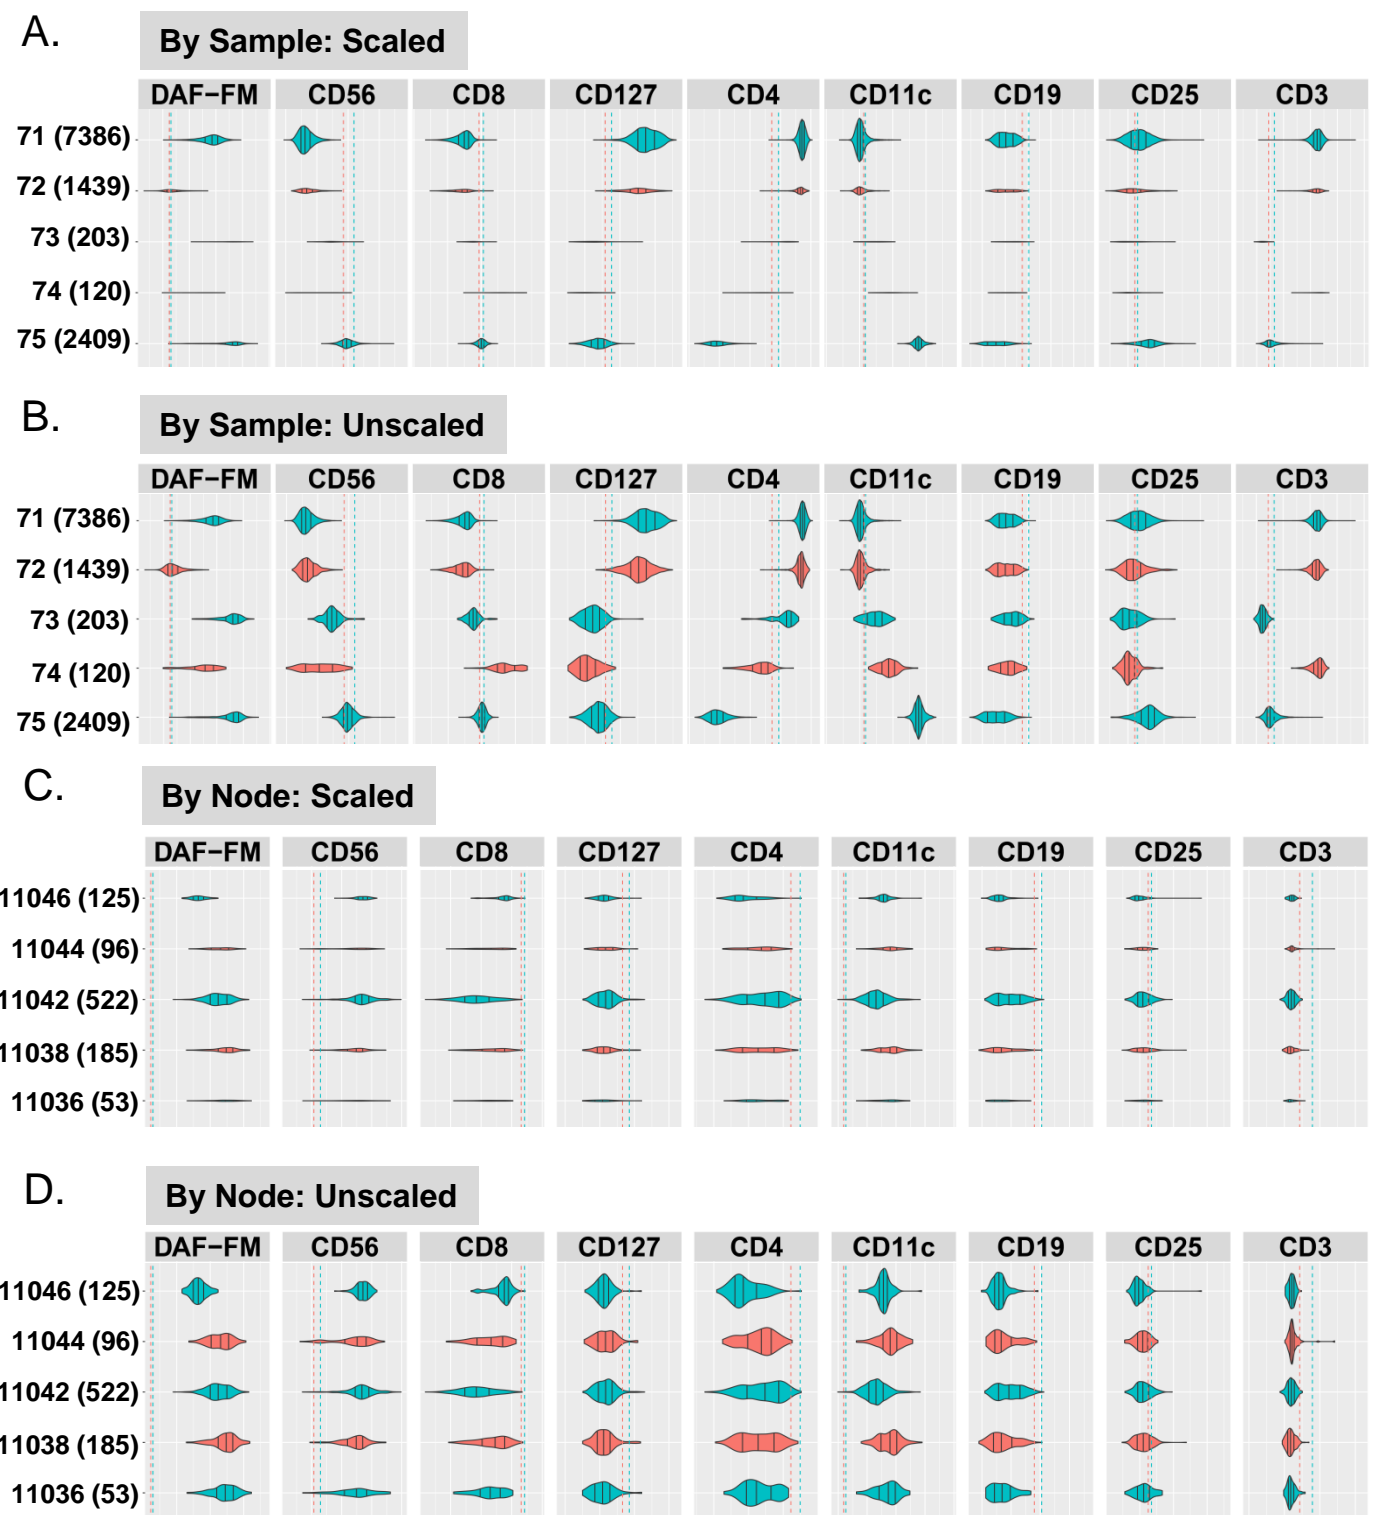

**Fig. S7. Visualization of violin plots.** (A-B) Displaying violin plots for de-identified PBMC sample: 10949 (Pre; RFS=1548) for lymphoid nodes 71 to 75. (A) Scaled for the number of events. (B) Unscaled. (C-D) Displaying violin plots for lymphoid node number 42 (NK cells) for de-identified PBMC samples: 11036 to 11046. (C) Scaled for the number of events. (D) Unscaled. Color scheme and positive/negative cutoff was as described in figure 1. Alternate colors are utilized to facilitate visualization. Positive/negative cutoff was demonstrated by blue and red dotted lines (99 and 95% confidence intervals), respectively.

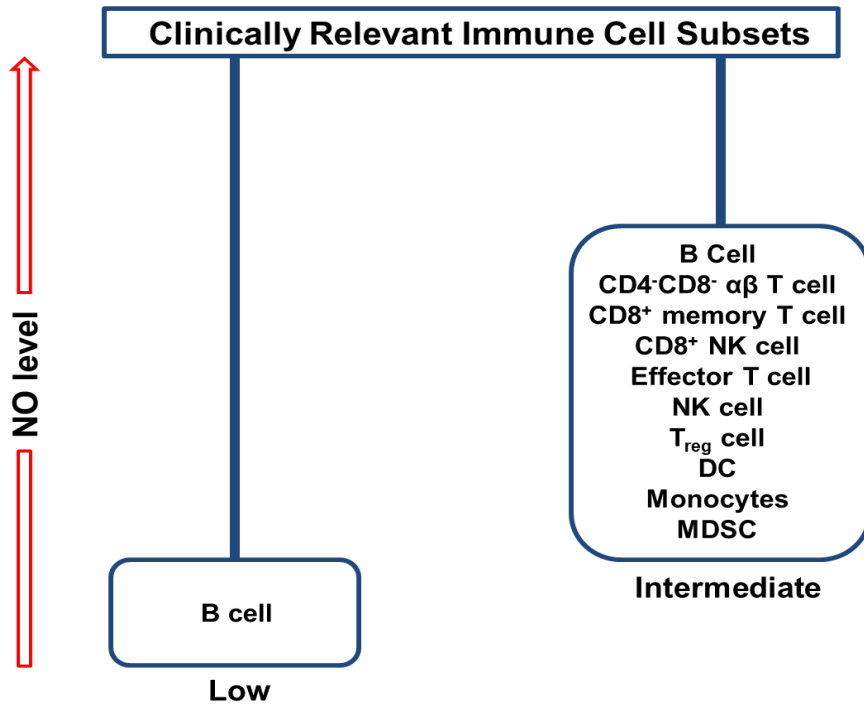

**Fig. S8a. Association of immune cell subsets with RFS and NO levels.** Cell subsets are presented with interesting clinical trends associated with low or intermediate NO levels. False discovery rates and Storey q-values were estimated for each subset of analyses to adjust for multiple comparisons but these analyses are overly stringent for this data set as there are not 200 independent cell types. **Abbreviations:** DC, dendritic cell; MDSC, myeloid-derived suppressor cell; NK, natural killer cell; T<sub>reg</sub>, T-regulatory cell.



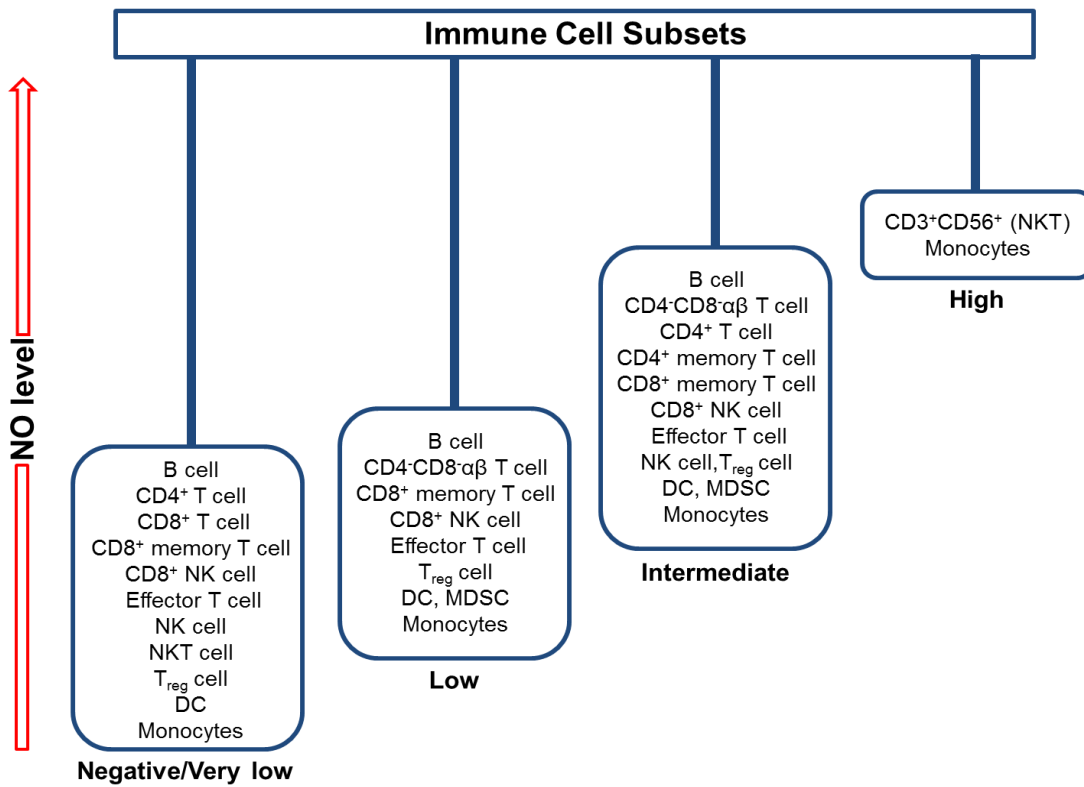

**Fig. S8b. Nitric oxide levels in immune cell subsets associated with adjuvant ipilimumab and peptide vaccine treatment, identified by the MPATR algorithm.**

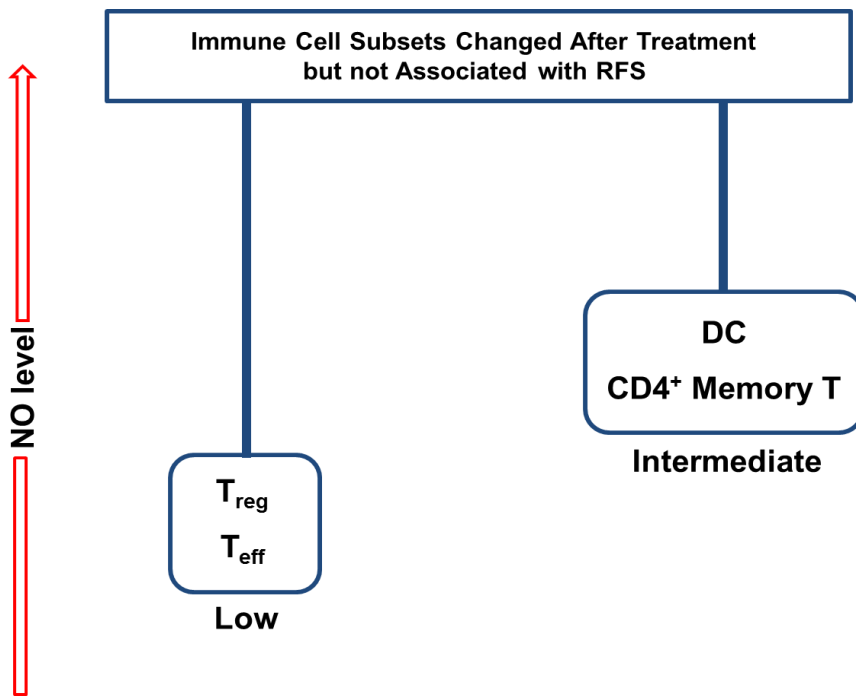

**Fig. S8c. Nitric oxide levels in immune cell subsets that changed with adjuvant ipilimumab and peptide vaccine treatment but were not associated with RFS, identified by the MPATR algorithm.**

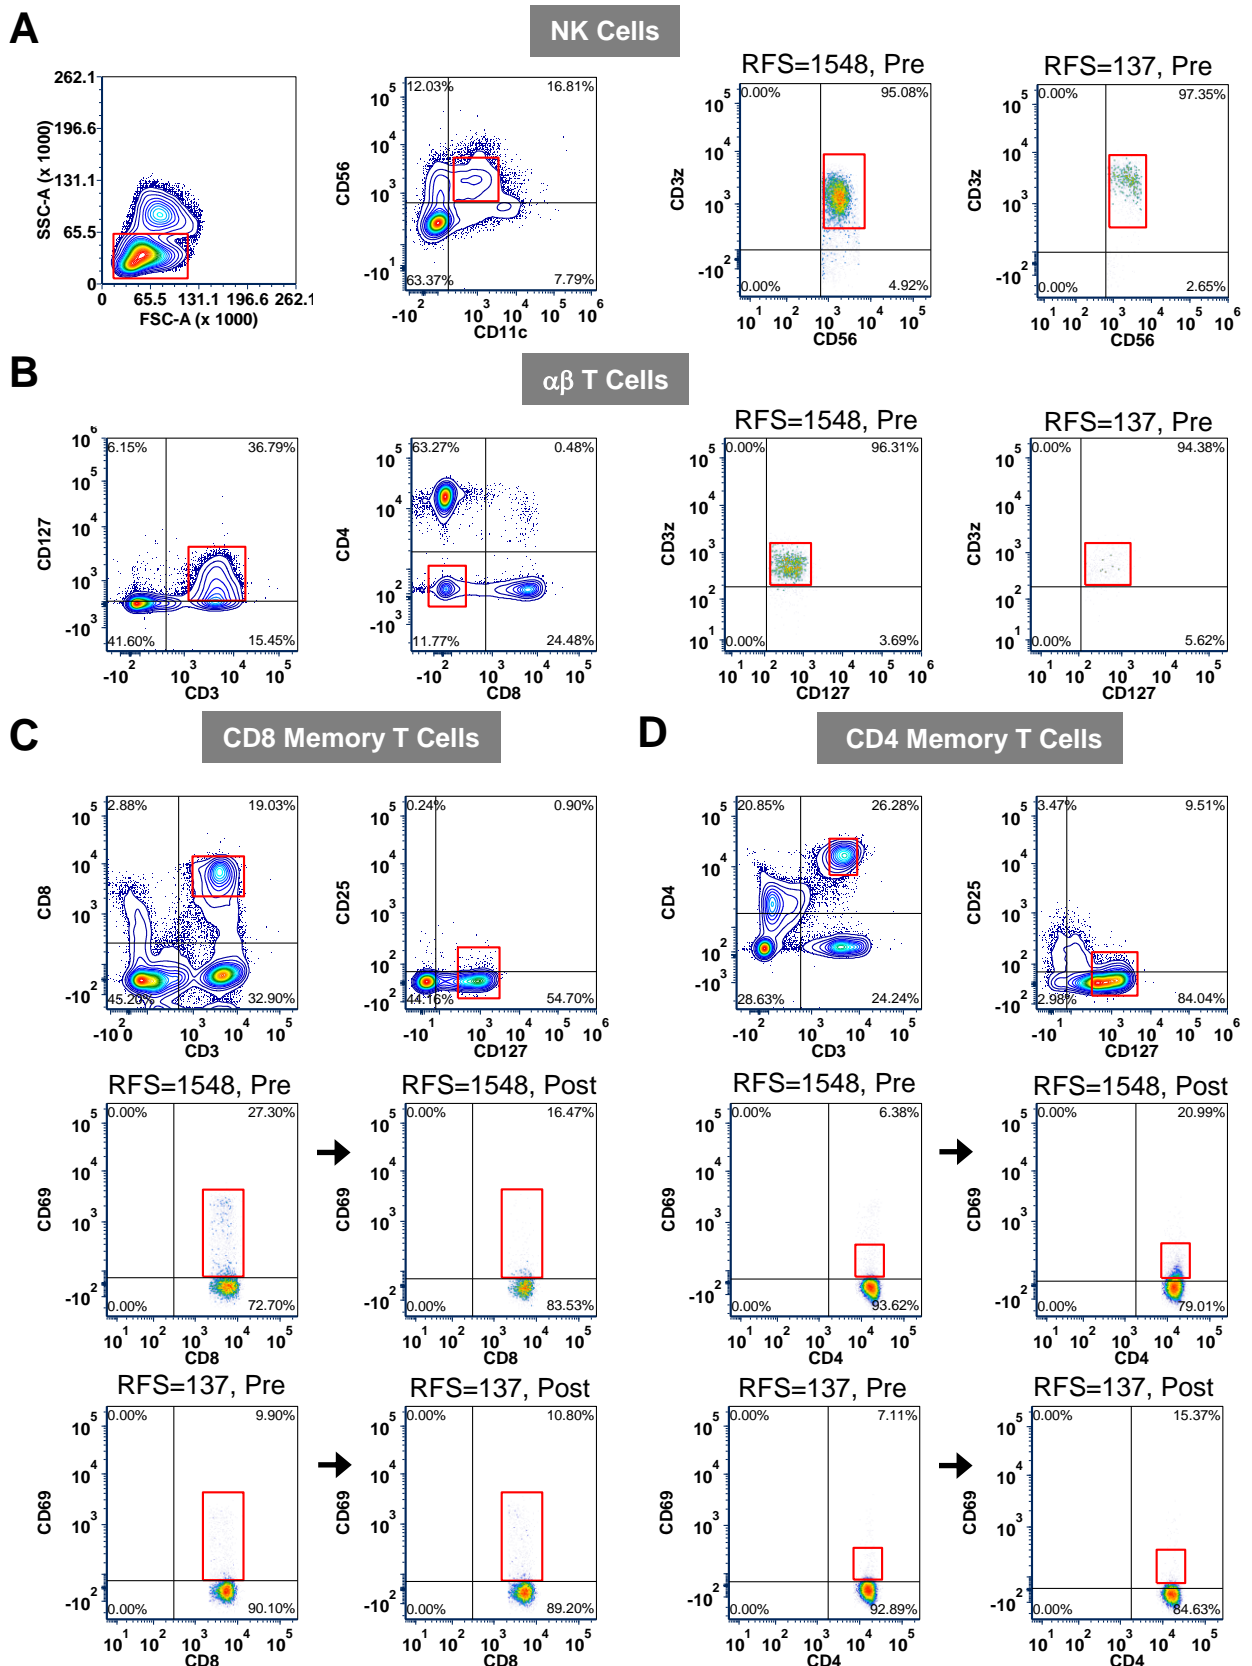

**Fig. S9. Activation marker CD69 and TCR- $\zeta$  in NK,  $\alpha\beta$  T cells, CD8 and CD4 Memory T cells.** (A) Numbers of NK cells ( $CD56^+CD11c^+CD25^{-/lo}$ ) with TCR- $\zeta$  expression increase pre-treatment in PBMCs collected from a patient with long RFS. (B) A similar trend was noticed for  $\alpha\beta$  T cells ( $CD3^+CD127^{+/lo}$ ). (C) A subset of CD8 memory T cells ( $CD3^+CD8^+CD127^{+ or +/lo}CD25^{-/lo}$ ) demonstrated CD69 expression in pre-treatment PBMC samples from patients with long RFS. (D) CD69 was elevated in small population of a subset of CD4 memory T cells ( $CD3^+CD4^+CD127^+CD25^{-/lo}$ ) in post treatment PBMC samples with long RFS.

**A**

NK cells

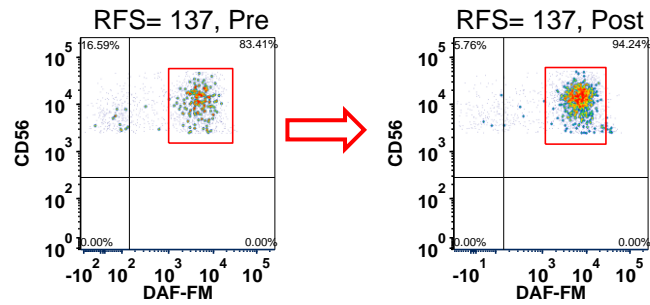**B**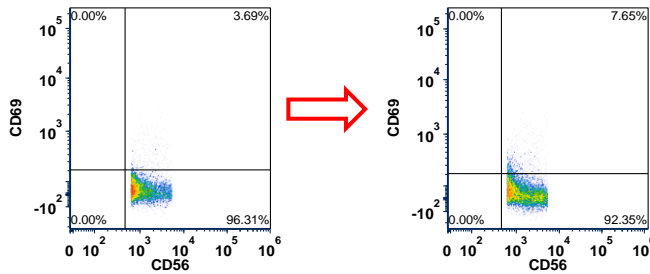**C**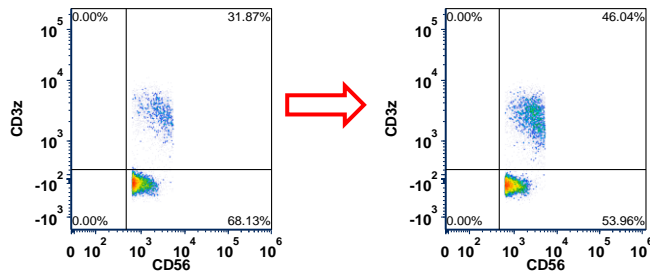

**Fig. S10. Chronic stimulation of NK cells demonstrates positive staining of NO, CD69 and TCR- $\zeta$  in PBMC samples with poor RFS.** (A) Natural killer cells (node 42 = CD56<sup>+/lo</sup>CD11c<sup>+</sup>CD25<sup>-/lo</sup>DAF-FM<sup>+</sup>) with an intermediate level of NO increased after treatment for most patients with short term RFS (B-C) CD69 and TCR- $\zeta$  also showed similar trends although CD69 demonstrated this trend in fewer cells.

**A**

Regulatory T cells

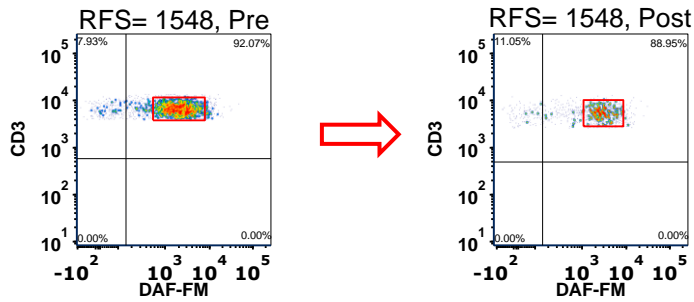**B**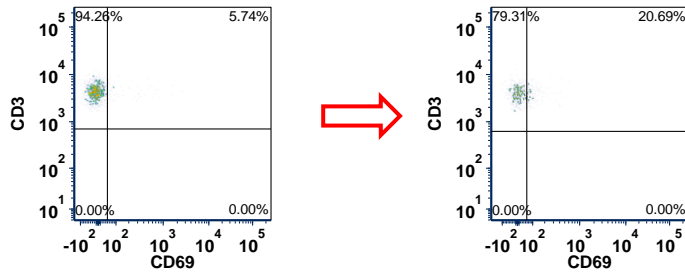**C**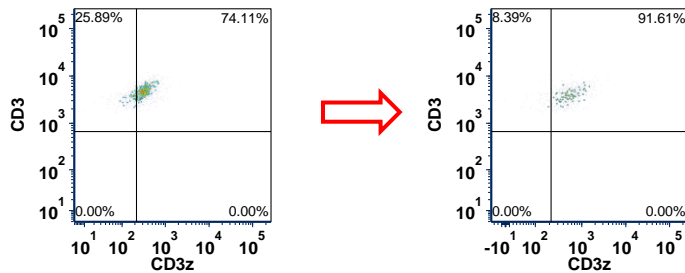**D**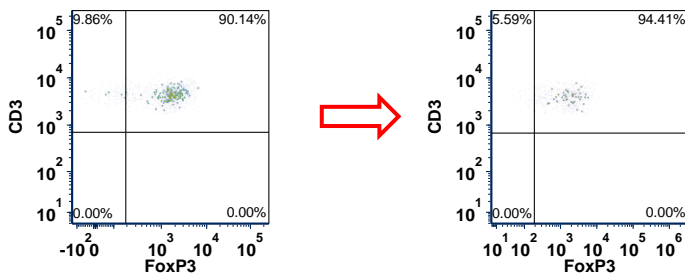

**Fig. S11. Decreased NO and TCR- $\zeta$  expression in regulatory T cells in PBMC sample after treatment.** (A) Numbers of regulatory T cells (node 159 = CD3<sup>+</sup>CD4<sup>+</sup>CD127<sup>-</sup>/CD25<sup>+</sup>DAF-FM<sup>+</sup>) with a low-to-intermediate NO level decrease after therapy (B) CD69 was not expressed either pre/post therapy whereas (C) TCR- $\zeta$ <sup>+</sup> Tregs decreased after therapy. (D) FoxP3 expression was positive in 90% pre-treatment and 94% post-treatment in gated events.

**A****MDSC**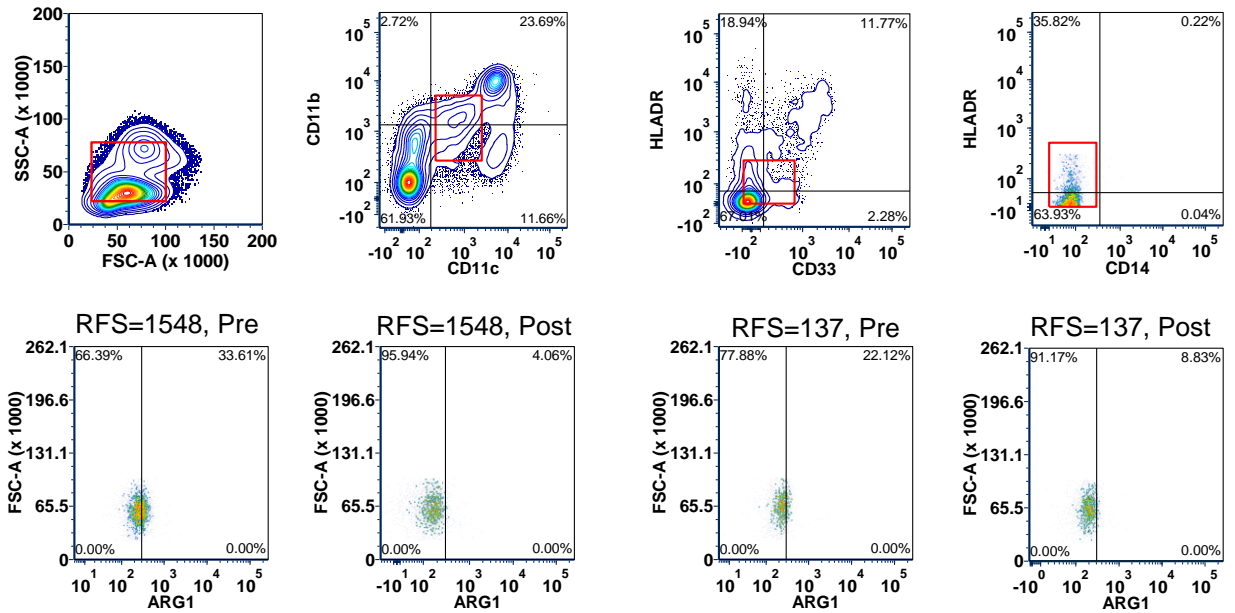**B****Dendritic Cells**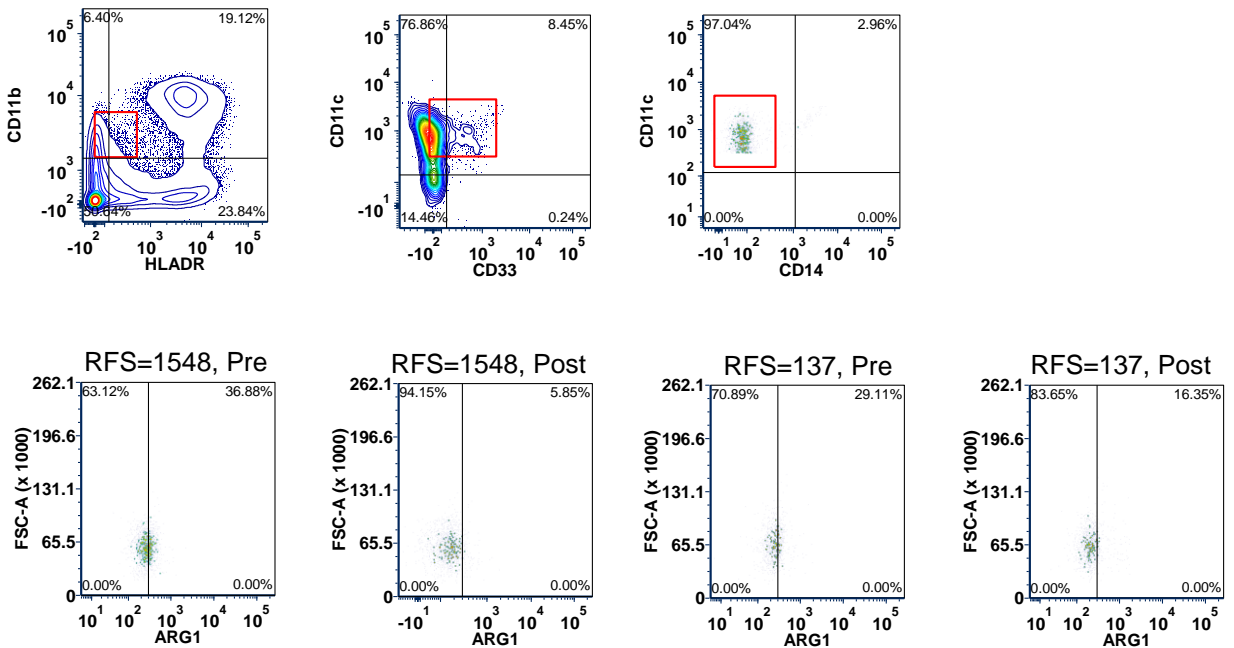

**Fig. S12. Downward trend of Arginase 1 expression in MDSCs and dendritic cells is associated with long RFS.** (A) MDSC-like (Node 196 FSC/SSC = HLADR<sup>-/lo</sup> or <sup>+/lo</sup>CD33<sup>-/lo</sup> or <sup>+/lo</sup>CD11b<sup>+</sup>CD11c<sup>+</sup>DAF-FM<sup>+</sup>) and (B) DC (Node 108 = HLA-DR<sup>+/lo</sup>CD33<sup>-/lo</sup> or <sup>+/lo</sup>CD11b<sup>+</sup>CD11c<sup>+</sup>DAF-FM<sup>+</sup>). MDSC and dendritic cells exhibited decreased levels of the immune inhibitory molecule Arginase 1 post-treatment in patients with long RFS.

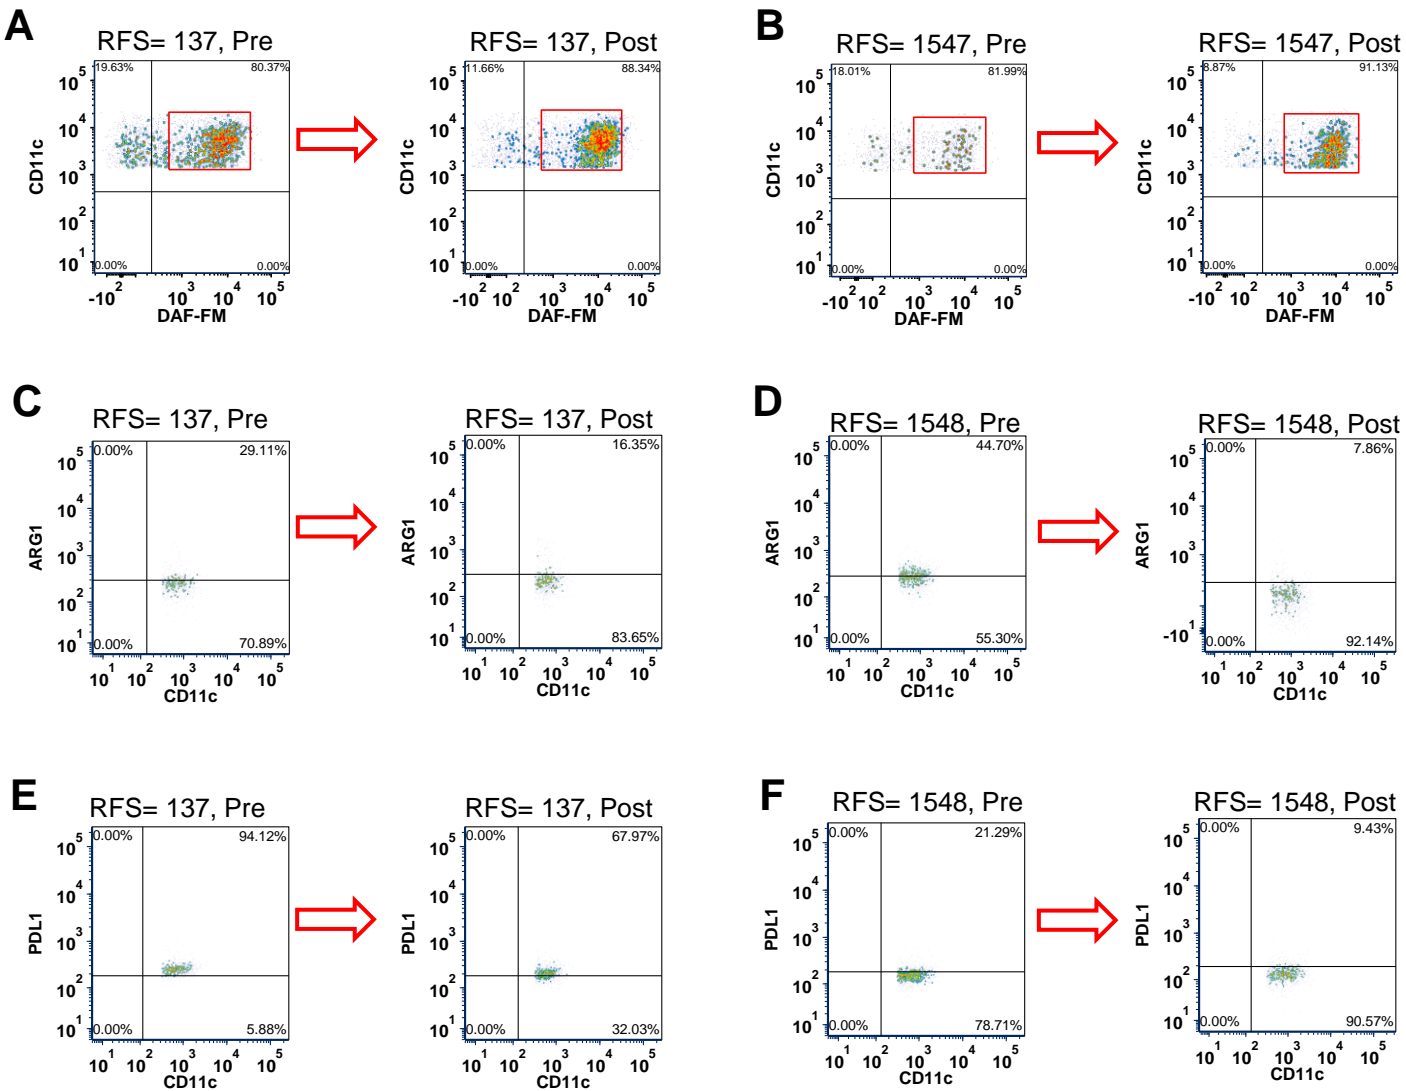

**Fig. S13. PD-L1 levels are increased in dendritic cells associated with poor RFS.** (A-B) Dendritic cells (node 108 = HLA-DR<sup>+/lo</sup>CD33<sup>-/lo</sup> or <sup>+/lo</sup>CD11b<sup>+</sup>CD11c<sup>+</sup>DAF-FM<sup>+</sup>) with intermediate levels of NO increased overall and were not associated with RFS after treatment. There were patient subsets that did demonstrate increase RFS with a more pronounced NO increase (C-D) Arginase 1 levels minimally decrease after treatment without association with RFS. (E-F) PD-L1 has increased expression on dendritic cells prior to therapy in patients with poor RFS.

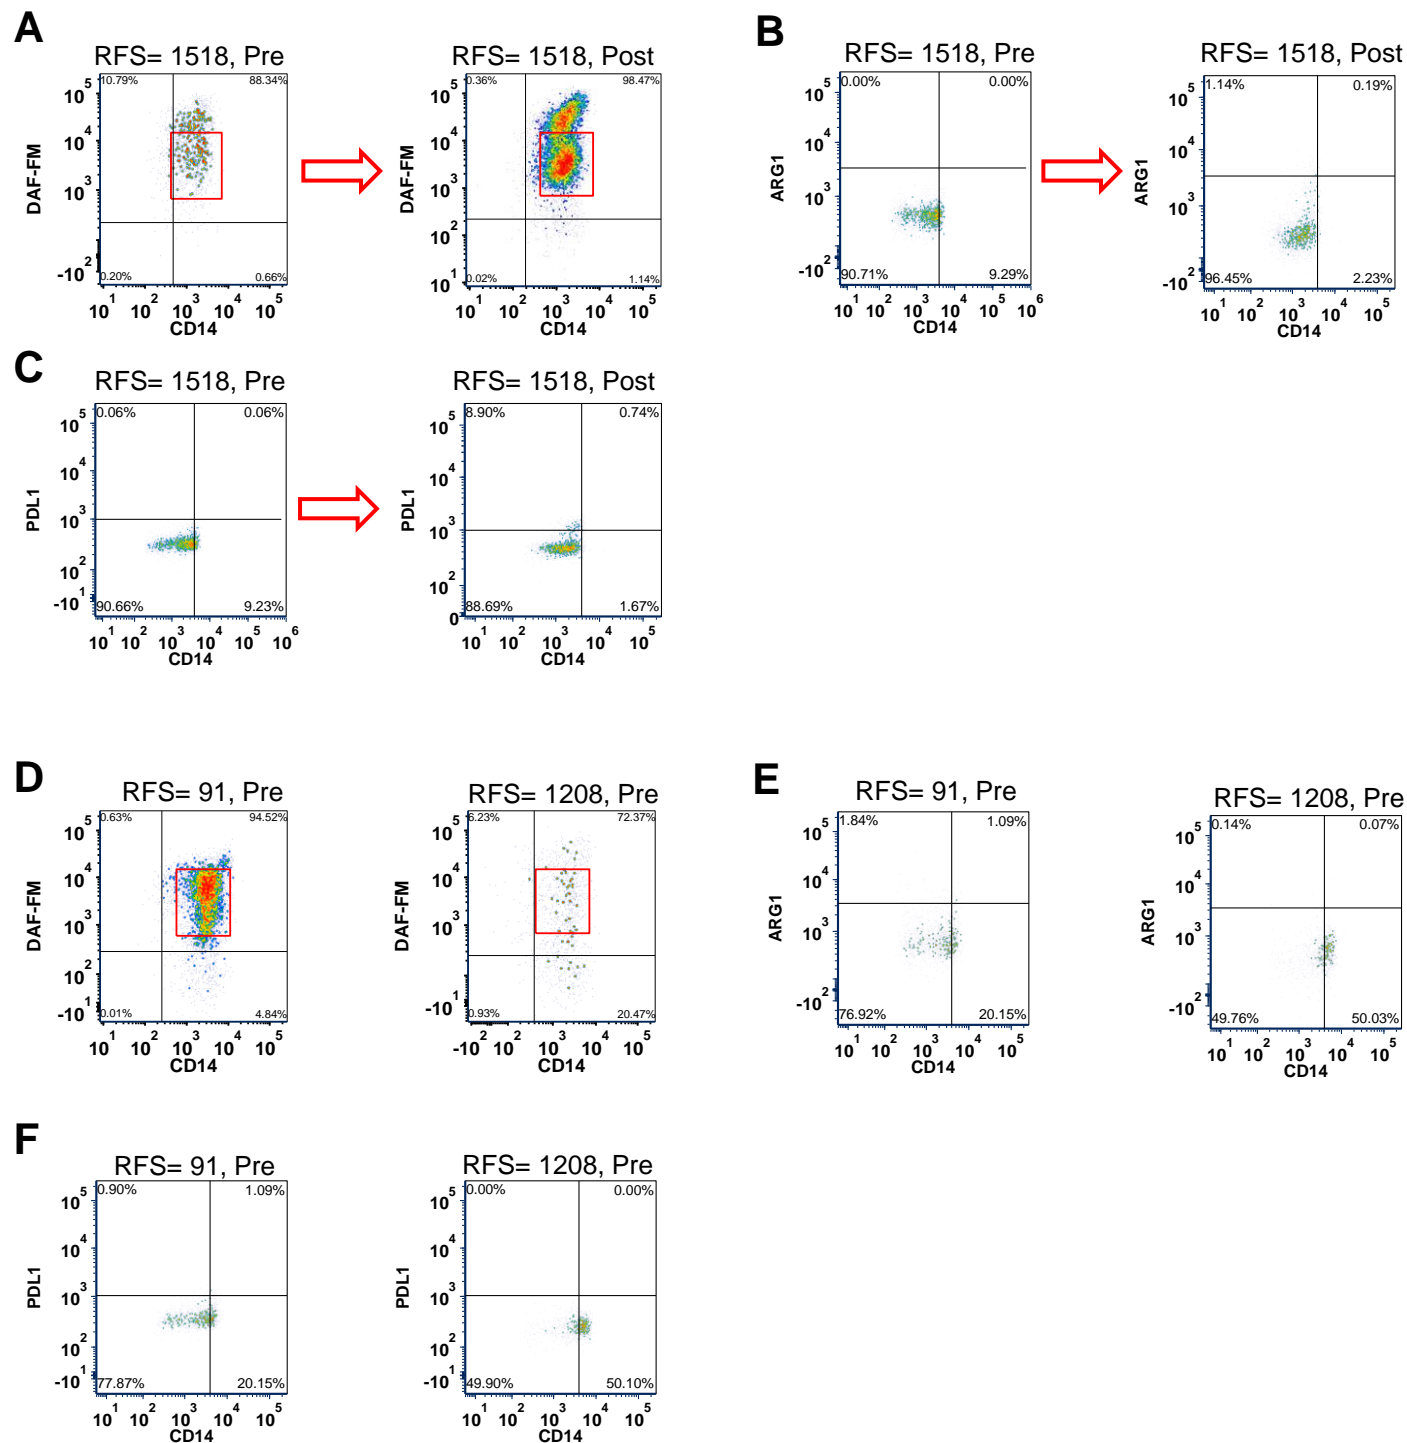

**Fig. S14. Mature monocytes display high NO levels pre-treatment in PBMCs collected from patients with short RFS, but demonstrate increased expression of NO after treatment in long RFS.** (A-C) Mature monocytes (node 167 = HLA-DR<sup>+</sup>CD33<sup>+</sup>CD11b<sup>+</sup>CD11c<sup>+</sup>CD14<sup>+</sup>DAF-FM<sup>+</sup>) with an intermediate level of NO, had an overall increase in the long-term RFS patients after treatment. Arginase 1 and PD-L1 did not show this robust trend (B-C). (D-F) Mature monocytes exhibited increased NO expression pre-treatment among patients with RFS  $\leq$  1 year. Again, Arginase 1 and PD-L1 did not show this trend (E-F).



**A**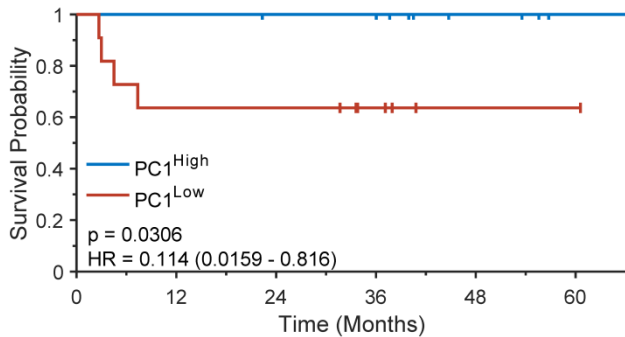

|                     |    |    |    |    |   |   |
|---------------------|----|----|----|----|---|---|
| PC1 <sup>High</sup> | 11 | 11 | 10 | 10 | 5 | 2 |
| PC1 <sup>Low</sup>  | 11 | 7  | 7  | 4  | 1 | 1 |

**B**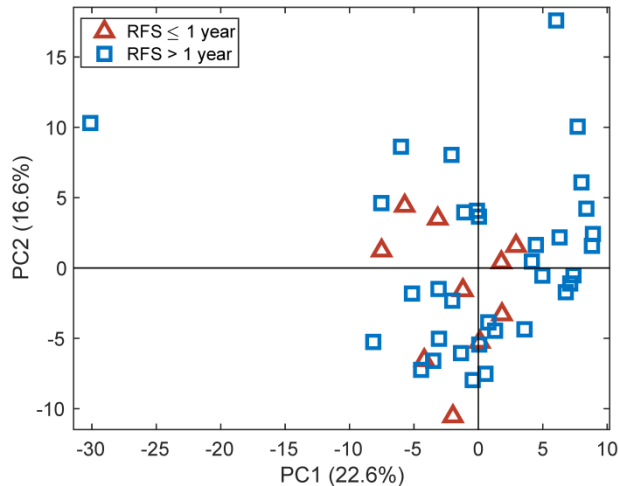**C**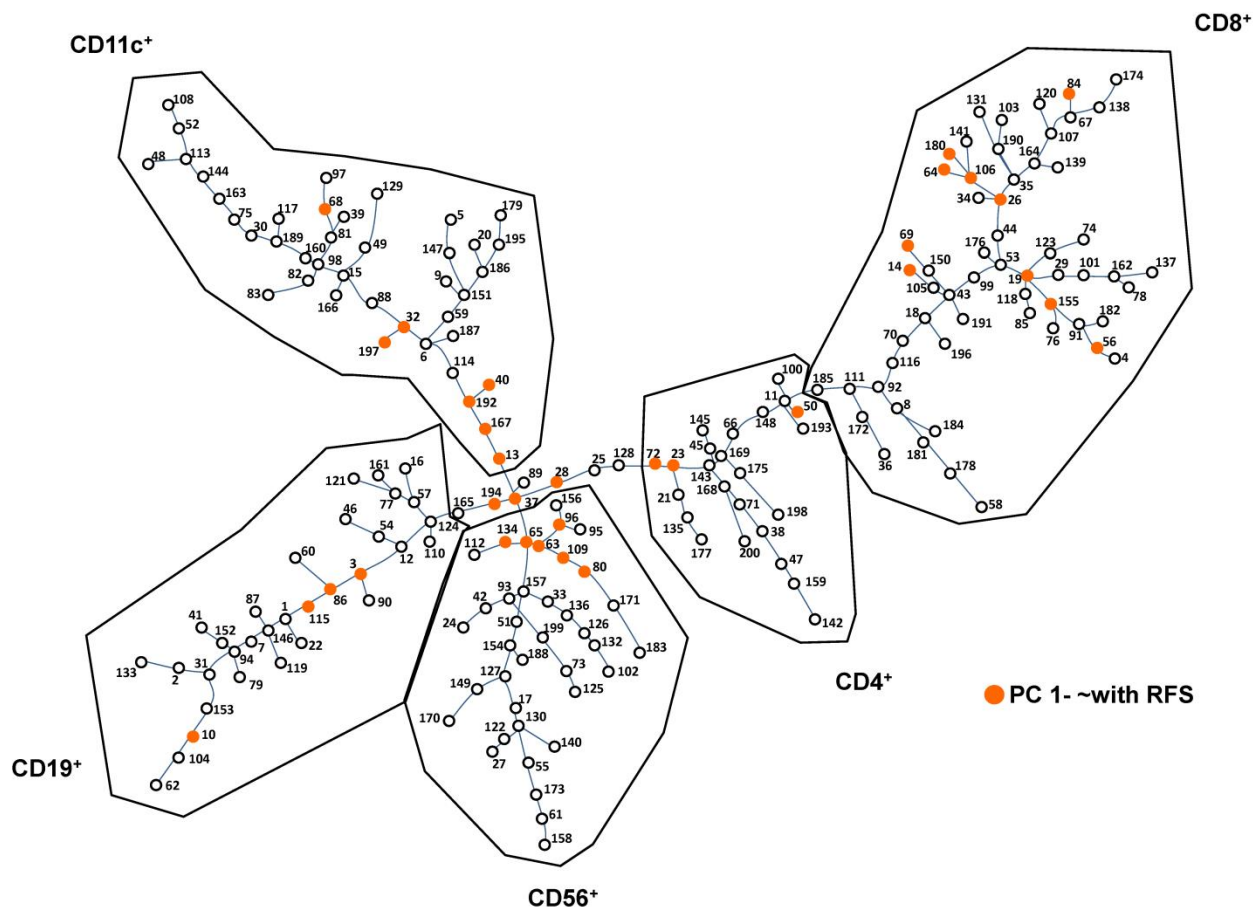

**Fig. S15. Principal component analysis of clustering tree of lymphocytes isolated prior to therapy.** (A) Kaplan-Meier plot demonstrates no relapses in the top quartile of principal component 1 (PC1). (B) A Biplot illustrating the distribution of contribution of PC1 and PC2 of clinical samples based on one year relapse free survival. (C) Clustering tree highlighting the nodes contributing greater than 1% towards PC1 (solid orange). And associated with RFS. We found that numbers of cells in lymphoid nodes comprising PC1 in general are associated with decreased RFS prior to therapy. These nodes that have an association with increased RFS are all T cells with increased nitric oxide levels, whereas immature B cells with NO are associated with worse outcomes. Groups of T cells associated with low NO expression are also associated with worse outcomes. The individual nodes are listed in **Table S7a**.

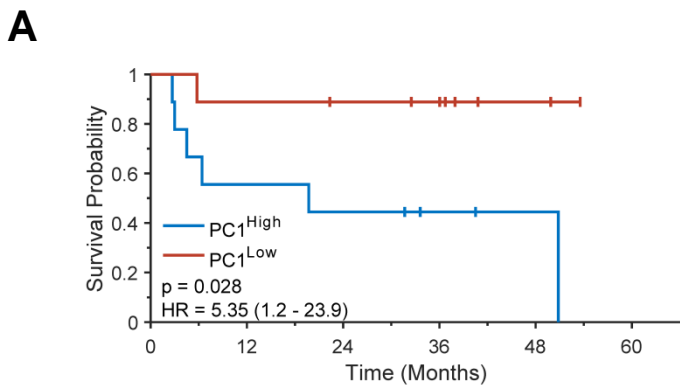

|                     |   |   |   |   |   |   |
|---------------------|---|---|---|---|---|---|
| PC1 <sup>High</sup> | 9 | 5 | 4 | 2 | 1 | 0 |
| PC1 <sup>Low</sup>  | 9 | 8 | 7 | 6 | 2 | 0 |

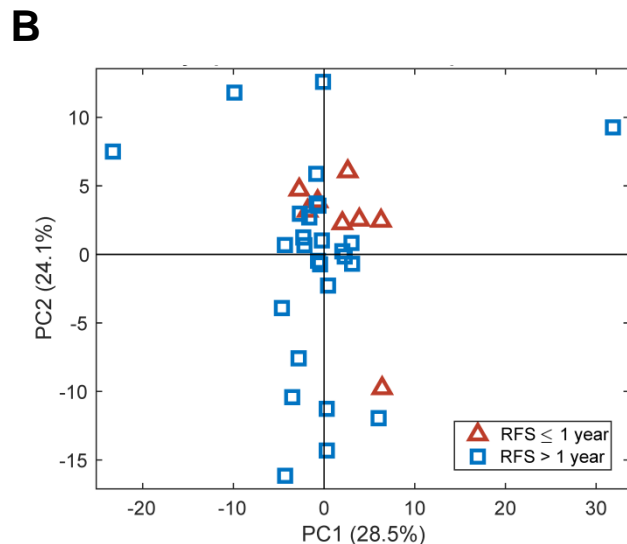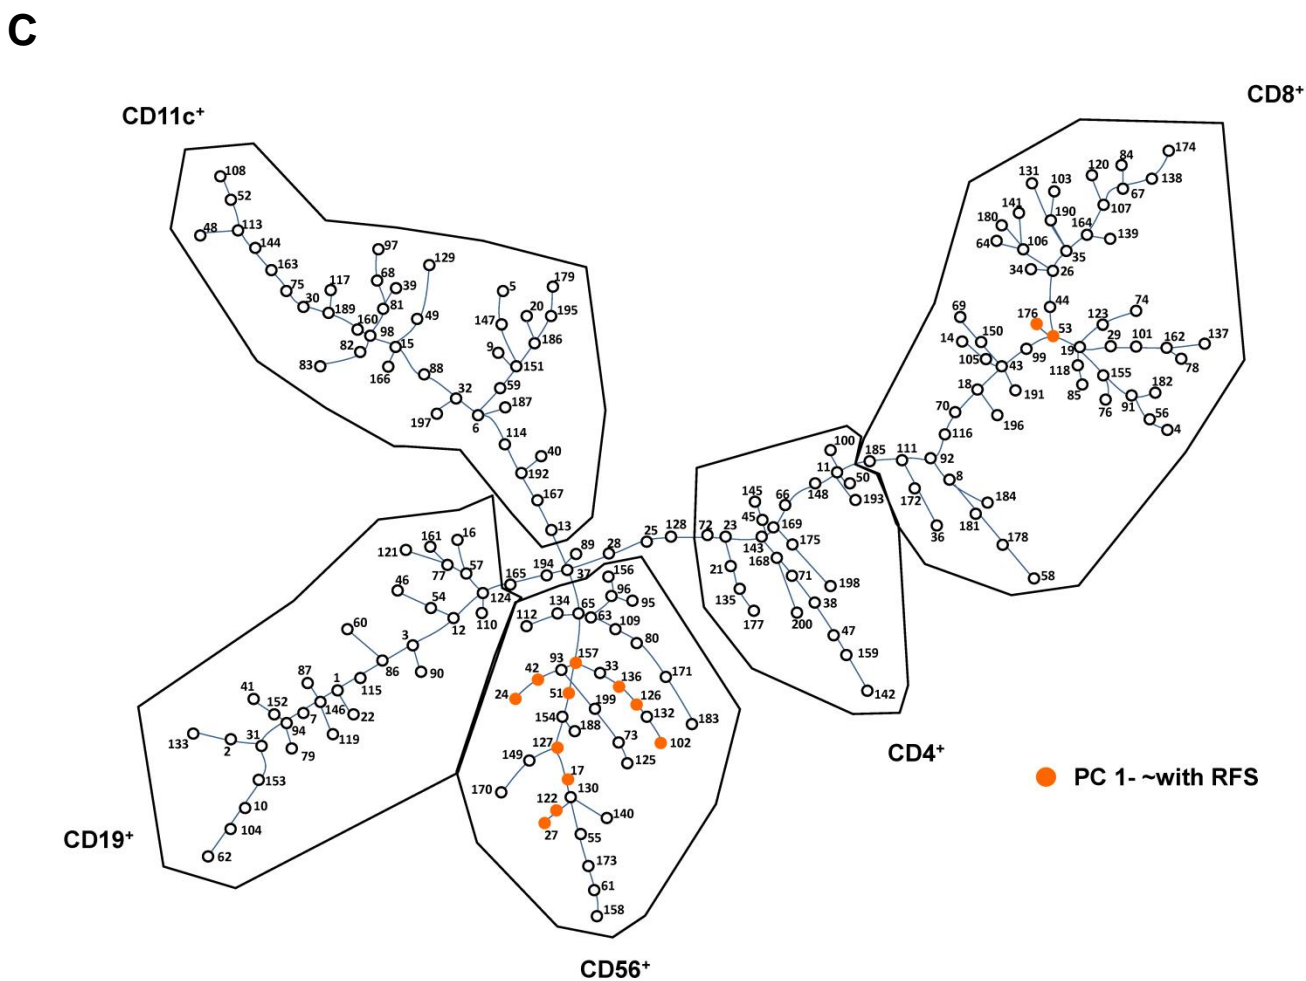

**Fig. S16. Principal component analysis and clustering tree of lymphocytes (post – pre).** (A) Kaplan-Meier plot illustrating the contribution of the principle component 1 on RFS (B) A Biplot illustrating the distribution of the contribution for PC1 and PC2 of clinical samples based on one year relapse free survival. (C) Clustering tree highlighting the nodes contributing to PC1 and demonstrates that the CD56 and CD8 lineage diffusely positive for NO. The Individual nodes are listed in **Table S7b**.

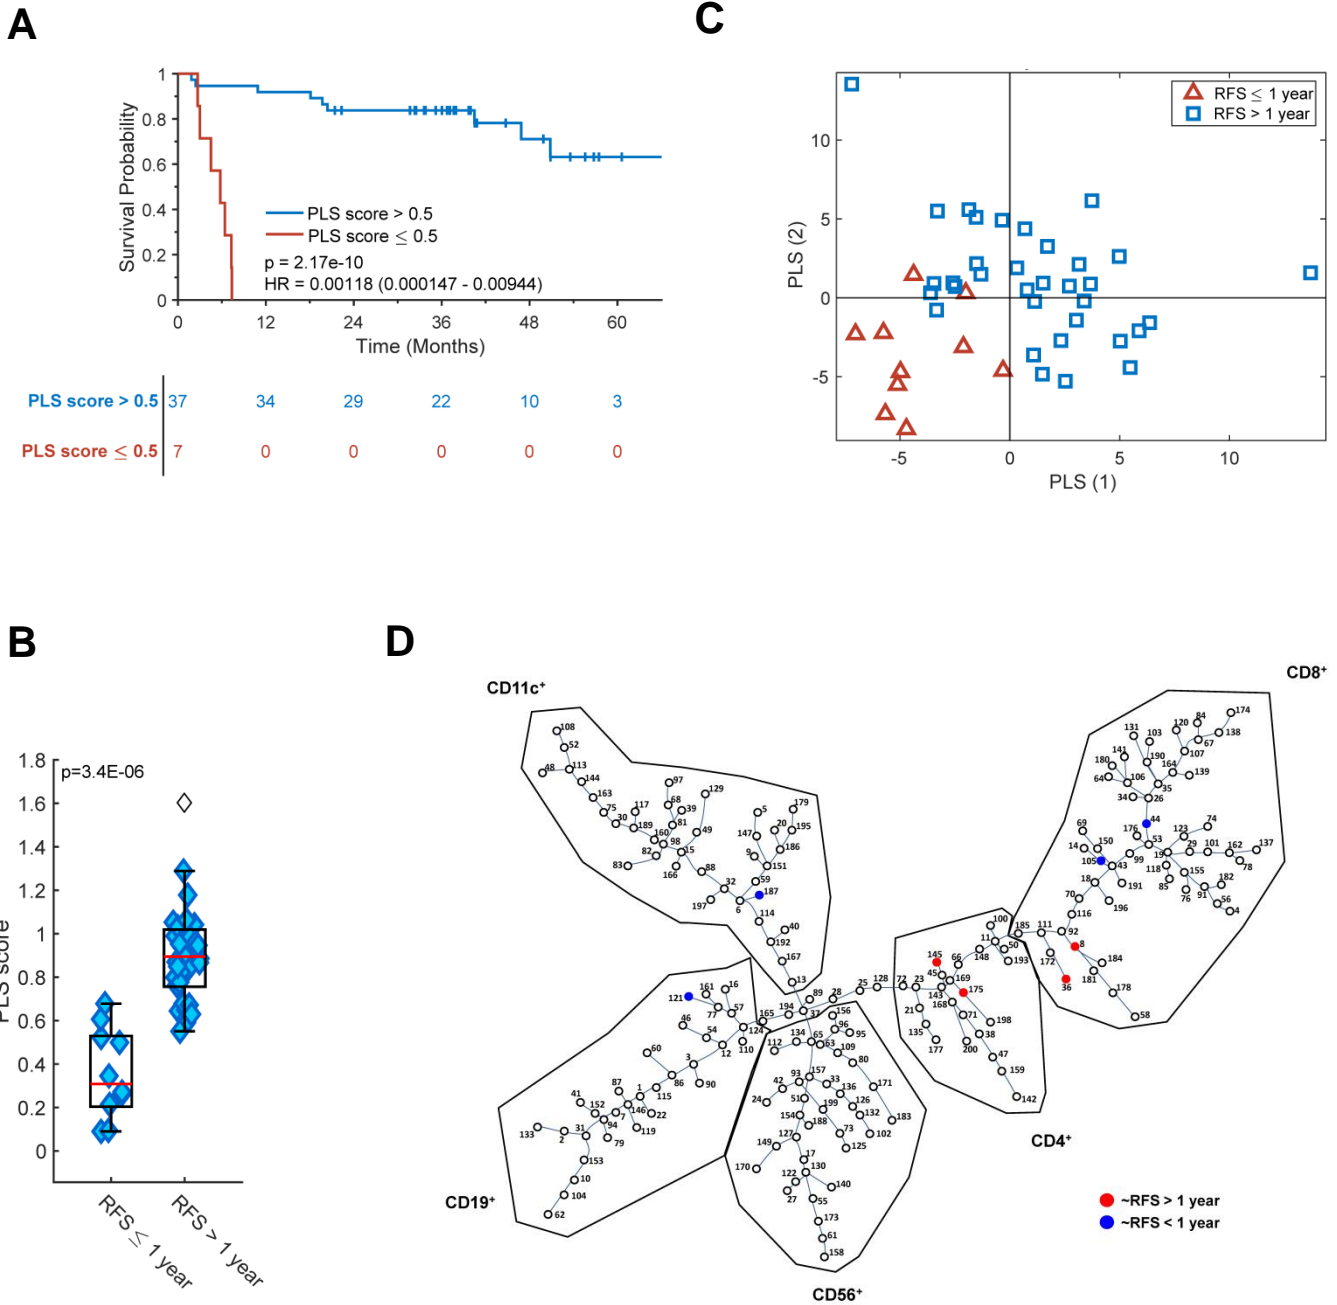

**Fig. S17. PLS analysis and clustering-tree generated of lymphocytes prior to therapy.** (A) Kaplan-Meier plot based on PLS score of two component analysis. (B) Histogram showing PLS scores of samples belonging to  $\leq 1$  year RFS and  $> 1$  year RFS. (C) A Biplot illustrating the distribution of values for PLS1 and PLS2 of clinical samples based on one year relapse free survival. (D) Clustering tree highlighting the major nodes that were contributing towards PLS differences (solid nodes). Red nodes, denotes a positive correlation with RFS whereas, blue nodes denotes a negative correlation with RFS. The individual nodes are listed in **Table S8a**.

A

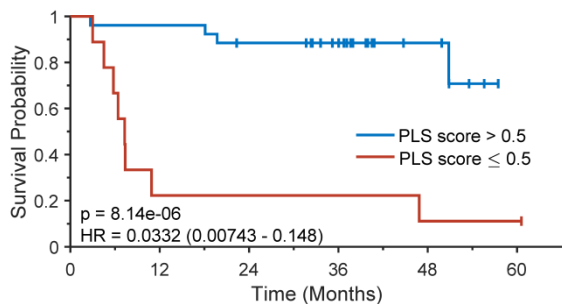

|                 |    |    |    |    |   |   |
|-----------------|----|----|----|----|---|---|
| PLS score > 0.5 | 26 | 25 | 22 | 16 | 6 | 0 |
| PLS score ≤ 0.5 | 9  | 2  | 2  | 2  | 1 | 1 |

C

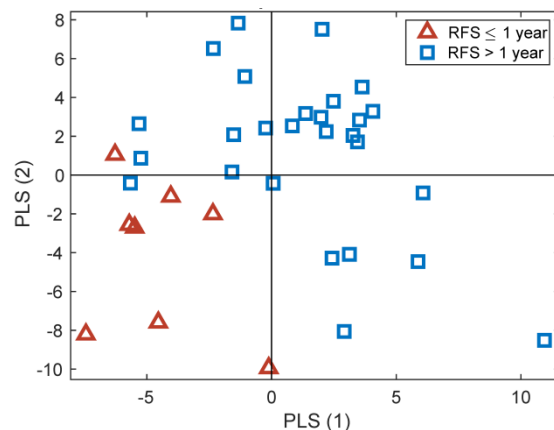

B

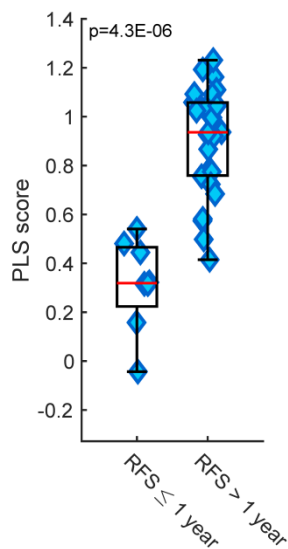

D

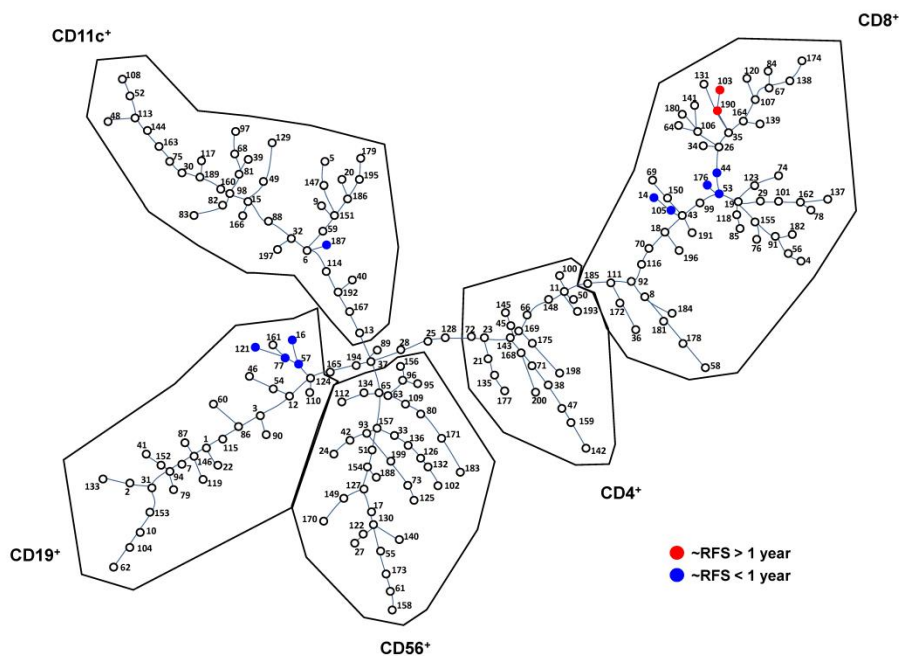

**Fig. S18. PLS analysis and clustering tree generated of lymphocytes after therapy.** (A) Kaplan-Meier plot based on PLS score of two component analysis. (B) Histogram showing PLS scores of samples belonging to  $\leq 1$  year RFS and  $> 1$  year RFS. (C) A Biplot illustrating the distribution of values for PLS1 and PLS2 of clinical samples based on one year relapse free survival. (D) SPADE tree highlighting the major nodes that were contributing towards PLS differences (solid nodes). Red nodes, denotes a positive correlation with RFS whereas, blue nodes denotes a negative correlation with RFS. The individual nodes are listed in **Table S8b**.

**Table S1a. Antibodies associated with their respective fluorochrome used to delineate lymphoid cell subsets with DAF-FM.**

| Specificity | Clone    | Fluorochrome | Vendor         |
|-------------|----------|--------------|----------------|
| NO          | n/a      | DAF-FM       | Invitrogen     |
| Dead Cells  | n/a      | Zombie-NIR   | Biolegend      |
| CD3         | SK7      | BUV395       | BD Biosciences |
| CD8         | SK1      | BV510        | BD Biosciences |
| CD11c       | B-ly6    | PE           | BD Biosciences |
| CD56        | NCAM16.2 | BV421        | BD Biosciences |
| CD4         | SK3      | AF700        | Biolegend      |
| CD19        | HIB19    | PE-Dazzle    | Biolegend      |
| CD25        | BC96     | PE-Cy7       | Biolegend      |
| CD127       | A019D5   | APC          | Biolegend      |

The associated isotypes for each antibody was purchased from the vendor.

**Table S1b. Antibodies associated with their respective fluorochrome used to delineate myeloid cell subsets with DAF-FM.**

| Specificity | Clone  | Fluorochrome | Vendor         |
|-------------|--------|--------------|----------------|
| NO          | n/a    | DAF-FM       | Invitrogen     |
| Dead Cells  | n/a    | Zombie-NIR   | Biolegend      |
| CD33        | WM53   | APC          | BD Biosciences |
| HLADR       | G46-6  | PE-Cy7       | BD Biosciences |
| CD11b       | ICRF44 | BV421        | BD Biosciences |
| CD11c       | B-ly6  | PE           | BD Biosciences |
| CD14        | MΦP9   | BUV395       | BD Biosciences |
| CD15        | W6D3   | BV510        | BD Biosciences |

The associated isotypes for each antibody was purchased from the vendor.

**Table S1c. Antibodies associated with their respective fluorochrome used to delineate lymphoid cell subsets without DAF-FM.**

| <b>Specificity</b>   | <b>Clone</b> | <b>Fluorochrome</b> | <b>Vendor</b>  |
|----------------------|--------------|---------------------|----------------|
| Dead Cells           | n/a          | Zombie-NIR          | Biolegend      |
| CD3                  | SK7          | BUV395              | BD Biosciences |
| CD8                  | SK1          | BUV805              | BD Biosciences |
| CD11c                | B-ly6        | BV650               | BD Biosciences |
| CD56                 | NCAM16.2     | BV480               | BD Biosciences |
| CD4                  | SK3          | BUV563              | BD Biosciences |
| CD19                 | HIB19        | PerCP/Cy5.5         | BD Biosciences |
| CD25                 | BC96         | PE-Cy7              | Biolegend      |
| CD127                | A019D5       | BV711               | Biolegend      |
| CD69                 | FN50         | APC-R700            | BD Biosciences |
| FoxP3                | 259D/C7      | PE-CF594            | BD Biosciences |
| IFN- $\gamma$        | 4S.B3        | BV786               | BD Biosciences |
| CD3z (TCR- $\zeta$ ) | K25-407.69   | AF647               | BD Biosciences |
| Arginase 1           | 14D2C43      | PE                  | Biolegend      |
| CTLA4                | BNI3         | BV421               | BD Biosciences |
| PD-L1                | MIH1         | BB515               | BD Bioscience  |

The associated isotypes for each antibody was purchased from the vendor.

**Table S1d. Antibodies associated with their respective fluorochrome used to delineate myeloid cell subsets without DAF-FM.**

| <b>Specificity</b> | <b>Clone</b> | <b>Fluorochrome</b> | <b>Vendor</b>  |
|--------------------|--------------|---------------------|----------------|
| Dead Cells         | n/a          | Zombie-NIR          | Biolegend      |
| CD33               | WM53         | APC                 | BD Biosciences |
| HLA-DR             | G46-6        | PE-Cy7              | BD Biosciences |
| CD11b              | ICRF44       | PerCP/Cy5.5         | Biolegend      |
| CD11c              | B-ly6        | BV650               | BD Biosciences |
| CD14               | M $\Phi$ P9  | BUV395              | BD Biosciences |
| CD15               | W6D3         | BV510               | BD Biosciences |
| CTLA4              | BNI3         | BV421               | BD Biosciences |
| PD-L1              | MIH1         | BB515               | BD Bioscience  |
| Arginase 1         | 14D2C43      | PE                  | Biolegend      |
| FoxP3              | 259D/C7      | PE-CF594            | BD Biosciences |
| IFN- $\gamma$      | 4S.B3        | BV786               | BD Biosciences |

The associated isotypes for each antibody was purchased from the vendor.

**Table S2. Clinical characteristics of metastatic melanoma patients who received adjuvant ipilimumab and peptide vaccine treatment.** Many patients did not progress at the end of the study and have an RFS censor value of 0.

| Patient | ID pre | ID Post | dose | Gender | Stage | Study Age | RFS Censor | RFS (days) |
|---------|--------|---------|------|--------|-------|-----------|------------|------------|
| 1       | 10836  | 10897   | 3    | F      | III   | 32        | 1          | 195        |
| 2       | 10851  | 10888   | 3    | F      | IV    | 55        | 1          | 551        |
| 3       | 10877  | 10912   | 3    | F      | III   | 65        | 0          | 1216       |
| 4       | 10885  | 10918   | 3    | M      | III   | 78        | 0          | 1362       |
| 5       | 10889  | 10917   | 3    | F      | III   | 36        | 0          | 1692       |
| 6       | 10909  | 10935   | 3    | F      | IV    | 58        | 0          | 680        |
| 7       | 10944  | 10966   | 10   | M      | IV    | 61        | 0          | 1749       |
| 8       | 10945  | 10967   | 10   | M      | III   | 36        | 0          | 1233       |
| 9       | 10947  | 10971   | 10   | M      | III   | 59        | 1          | 600        |
| 10      | 10948  | 10965   | 10   | F      | IV    | 43        | 0          | 1208       |
| 11      | 10949  | 10970   | 10   | M      | III   | 58        | 0          | 1548       |
| 12      | 10959  | 10977   | 10   | M      | IV    | 43        | 0          | 1630       |
| 13      | 10960  | 10975   | 10   | M      | III   | 64        | 0          | 984        |
| 14      | 10984  | 11006   | 10   | F      | IV    | 61        | 0          | 1071       |
| 15      | 10985  | 10999   | 10   | M      | IV    | 21        | 1          | 91         |
| 16      | 10988  | 11000   | 10   | F      | IV    | 28        | 1          | 82         |
| 17      | 10989  | 11013   | 10   | M      | III   | 62        | 1          | 224        |
| 18      | 10992  | 11021   | 10   | M      | III   | 46        | 1          | 1547       |
| 19      | 10993  | 11022   | 10   | M      | IV    | 63        | 1          | 332        |
| 20      | 10997  | 11023   | 10   | F      | IV    | 53        | 1          | 222        |
| 21      | 10998  | 11024   | 10   | F      | IV    | 51        | 0          | 1242       |
| 22      | 11001  | 11030   | 10   | M      | IV    | 40        | 0          | 1844       |
| 23      | 11002  | 11031   | 10   | M      | III   | 50        | 0          | 1130       |
| 24      | 11004  | 11034   | 10   | M      | IV    | 65        | 0          | 1146       |
| 25      | 11005  | 11035   | 10   | M      | III   | 47        | 1          | 137        |
| 26      | 11007  | 11044   | 10   | F      | IV    | 51        | 0          | 1155       |
| 27      | 11012  | 11042   | 10   | M      | III   | 70        | 1          | 1426       |
| 28      | 11014  | 11047   | 10   | F      | III   | 78        | 0          | 1097       |
| 29      | 11016  | 11046   | 10   | F      | III   | 29        | 0          | 989        |
| 30      | 11017  | 11052   | 10   | M      | III   | 61        | 1          | 176        |
| 31      | 11019  | 11050   | 10   | M      | IV    | 64        | 0          | 1118       |
| 32      | 11029  | 11056   | 10   | M      | IV    | 65        | 0          | 1023       |
| 33      | 11036  | 11058   | 10   | M      | IV    | 39        | 0          | 964        |
| 34      | 11038  | 11067   | 10   | M      | IV    | 63        | 0          | 964        |
| 35      | 11048  | 11064   | 10   | M      | IV    | 63        | 0          | 1518       |
| 36      | 10844  |         | 3    | F      | III   | 41        | 0          | 2273       |
| 37      | 10880  |         | 3    | F      | IV    | 63        | 0          | 1728       |
| 38      | 10893  |         | 3    | M      | III   | 70        | 0          | 2156       |
| 39      | 10946  |         | 10   | M      | IV    | 42        | 1          | 1232       |
| 40      | 10996  |         | 10   | M      | III   | 44        | 1          | 56         |
| 41      | 11010  |         | 10   | M      | IV    | 70        | 1          | 621        |
| 42      | 11020  |         | 10   | M      | IV    | 44        | 1          | 74         |
| 43      | 11025  |         | 10   | F      | III   | 56        | 0          | 652        |
| 44      | 11026  |         | 10   | M      | III   | 66        | 0          | 1029       |

**Table S3. Phenotypic characteristics of lymphoid immune cells (nodes) associated with treatment effects from the MPATR output.**

| Table S3. Lymphoid cell phenotypes (nodes) associated with treatment effects from the MPATR analysis |                                                                                                                     |                                           |              |                                                                                                                                                                                                                                                                   |
|------------------------------------------------------------------------------------------------------|---------------------------------------------------------------------------------------------------------------------|-------------------------------------------|--------------|-------------------------------------------------------------------------------------------------------------------------------------------------------------------------------------------------------------------------------------------------------------------|
| Node                                                                                                 | Phenotype                                                                                                           | Cell type                                 | Cell Range   | Statistics                                                                                                                                                                                                                                                        |
| 3                                                                                                    | CD19 <sup>+</sup> CD25 <sup>-/lo</sup> DAF-FM <sup>+/lo</sup>                                                       | B Cell                                    | 41 to 3817   | <b>Cox.1</b> , exp(coef) = 1.64, p = 0.049<br><b>Cox.4</b> , exp(coef) = 0.666, p = 0.046                                                                                                                                                                         |
| 60                                                                                                   | CD19 <sup>+</sup> CD11c <sup>-/lo</sup> CD25 <sup>-/lo</sup> or <sup>+/lo</sup> DAF-FM <sup>+/lo</sup>              | B Cell                                    | 3 to 869     | <b>Cox.1</b> , exp(coef) = 2.130, p = 0.011<br><b>Cox.2</b> , exp(coef) = 0.357, p = 0.024<br><b>Cox.4</b> , exp(coef) = 0.515, p = 0.004<br><b>Wilc.4</b> , RFS(<1yr, median = -1.024),<br>RFS(>1yr, median = 0.421), p = 0.027                                  |
| 86                                                                                                   | CD19 <sup>+</sup> CD25 <sup>-/lo</sup> DAF-FM <sup>+/lo</sup> or <sup>+/lo</sup>                                    | B Cell                                    | 16 to 4809   | <b>Cox.1</b> , exp(coef) = 1.777, p = 0.034<br><b>Cox.4</b> , exp(coef) = 0.668, p = 0.030                                                                                                                                                                        |
| 90                                                                                                   | CD19 <sup>+</sup> CD25 <sup>-/lo</sup> DAF-FM <sup>+/lo</sup>                                                       | B Cell                                    | 5 to 1214    | <b>Cox.1</b> , exp(coef) = 1.983, p = 0.027                                                                                                                                                                                                                       |
| 115                                                                                                  | CD19 <sup>+</sup> CD11c <sup>-/lo</sup> CD25 <sup>-/lo</sup> DAF-FM <sup>+/lo</sup>                                 | B Cell                                    | 9 to 1899    | <b>Cox.4</b> , exp(coef) = 0.677, p = 0.047                                                                                                                                                                                                                       |
| 143                                                                                                  | CD3 <sup>+</sup> CD4 <sup>+</sup> CD127 <sup>+</sup> CD25 <sup>-/lo</sup> DAF-FM <sup>+</sup>                       | CD4 Naive or Memory T Cell                | 486 to 11473 | <b>Wilc.3</b> , Mean = -0.342, p = 0.002                                                                                                                                                                                                                          |
| 38                                                                                                   | CD3 <sup>+</sup> CD4 <sup>+</sup> CD127 <sup>+/lo</sup> CD25 <sup>-/lo</sup> DAF-FM <sup>+</sup>                    | CD4 Naive or Memory T Cell                | 149 to 4191  | <b>Wilc.3</b> , Mean = -0.363, p = 0.022                                                                                                                                                                                                                          |
| 45                                                                                                   | CD3 <sup>+</sup> CD4 <sup>+</sup> CD127 <sup>+</sup> CD25 <sup>-/lo</sup> DAF-FM <sup>+</sup>                       | CD4 Naive or Memory T Cell                | 358 to 20858 | <b>Wilc.3</b> , Mean = -0.359, p = 0.010                                                                                                                                                                                                                          |
| 175                                                                                                  | CD3 <sup>+</sup> CD4 <sup>+</sup> CD127 <sup>+</sup> CD25 <sup>-/lo</sup> or <sup>+/lo</sup> DAF-FM <sup>+</sup>    | CD4 Naive or Memory T Cell                | 3 to 6713    | <b>Wilc.1</b> , RFS(<1yr, mean = -11.003, SD =0.855),<br>RFS(>1yr, mean = -10.123, SD = 0.832), p = 0.007                                                                                                                                                         |
| 25                                                                                                   | CD3 <sup>+</sup> CD4 <sup>+/lo</sup> CD127 <sup>-/lo</sup> CD25 <sup>-/lo</sup>                                     | CD4 T Cell                                | 98 to 5518   | <b>Wilc.3</b> , Mean = -0.615, p = 0.002                                                                                                                                                                                                                          |
| 66                                                                                                   | CD3 <sup>+</sup> CD4 <sup>+</sup> CD127 <sup>-/lo</sup> CD25 <sup>-/lo</sup> DAF-FM <sup>+</sup>                    | CD4 T Cell                                | 95 to 2686   | <b>Wilc.3</b> , Mean = -0.652, p = 0.001                                                                                                                                                                                                                          |
| 128                                                                                                  | CD3 <sup>+</sup> CD4 <sup>- or +/lo</sup> CD127 <sup>-/lo</sup> CD25 <sup>-/lo</sup> DAF-FM <sup>+/lo</sup>         | CD4 T Cell                                | 72 to 3796   | <b>Wilc.3</b> , Mean = -0.519, p = 0.006                                                                                                                                                                                                                          |
| 177                                                                                                  | CD3 <sup>+</sup> CD4 <sup>+</sup> CD127 <sup>+</sup> CD25 <sup>+</sup> CD11c <sup>-/lo</sup> DAF-FM <sup>+/lo</sup> | CD4 T Cell                                | 0 to 527     | <b>Cox.4</b> , exp(coef) = 0.512, p = 0.016                                                                                                                                                                                                                       |
| 36                                                                                                   | CD3 <sup>+</sup> CD127 <sup>+/lo</sup> DAF-FM <sup>+</sup>                                                          | CD4 <sup>+</sup> CD8 <sup>αβ</sup> T Cell | 14 to 7534   | <b>Cox.4</b> , exp(coef) = 1.759, p =0.026<br><b>Wilc.4</b> , RFS(<1yr, median = 0.642),<br>RFS(>1yr, median = -0.053), p = 0.007                                                                                                                                 |
| 180                                                                                                  | CD3 <sup>+</sup> CD127 <sup>+/lo</sup> DAF-FM <sup>+/lo</sup>                                                       | CD4 <sup>+</sup> CD8 <sup>αβ</sup> T Cell | 9 to 693     | <b>Wilc.2</b> , RFS(<1yr, mean = -10.618, SD = 0.387),<br>RFS(>1yr, mean = -11.174, SD = 0.734), p = 0.010                                                                                                                                                        |
| 185                                                                                                  | CD3 <sup>+</sup> CD127 <sup>+</sup> or <sup>+/lo</sup> CD25 <sup>-/lo</sup> DAF-FM <sup>+</sup>                     | CD4 <sup>+</sup> CD8 <sup>αβ</sup> T Cell | 15 to 1335   | <b>Wilc.4</b> , RFS(<1yr, median = 0.510),<br>RFS(>1yr, median = -0.084), p = 0.041                                                                                                                                                                               |
| 26                                                                                                   | CD3 <sup>+</sup> CD8 <sup>+</sup> CD127 <sup>+</sup> DAF-FM <sup>+/lo</sup>                                         | CD8 Naive or Memory T Cell                | 34 to 1630   | <b>Cox.1</b> , exp(coef) = 3.635, p = 0.031<br><b>Wilc.1</b> , RFS(<1yr, mean = -7.843, SD =0.402),<br>RFS(>1yr, mean = -8.227, SD = 0.506), p = 0.038<br><b>Wilc.2</b> , RFS(<1yr, mean = -7.750, SD =0.611),<br>RFS(>1yr, mean = -8.216, SD = 0.549), p = 0.022 |
| 84                                                                                                   | CD3 <sup>+</sup> CD8 <sup>+</sup> CD127 <sup>+</sup> DAF-FM <sup>+/lo</sup>                                         | CD8 Naive or Memory T Cell                | 40 to 2548   | <b>Wilc.1</b> , RFS(<1yr, mean = -8.208, SD =0.227),<br>RFS(>1yr, mean = -8.537, SD = 0.486), p = 0.038<br><b>Wilc.2</b> , RFS(<1yr, mean = -8.023, SD = 0.544),<br>RFS(>1yr, mean = -8.414, SD = 0.528), p = 0.037                                               |
| 150                                                                                                  | CD3 <sup>+</sup> CD8 <sup>+</sup> CD127 <sup>+</sup> or <sup>+/lo</sup> CD25 <sup>-/lo</sup> DAF-FM <sup>+</sup>    | CD8 Naive or Memory T Cell                | 85 to 2331   | <b>Wilc.2</b> , RFS(<1yr, mean = -6.979, SD = 0.583),<br>RFS(>1yr, mean = -7.421, SD = 0.577), p = 0.037                                                                                                                                                          |
| 44                                                                                                   | CD3 <sup>+</sup> CD8 <sup>+</sup> CD127 <sup>+/lo</sup> DAF-FM <sup>+</sup>                                         | CD8 Naive or Memory T Cell                | 77 to 2542   | <b>Wilc.1</b> , RFS(<1yr, mean = -6.874, SD =0.464),<br>RFS(>1yr, mean = -7.274, SD = 0.533), p = 0.024                                                                                                                                                           |



**Table S3. Lymphoid cell phenotypes (nodes) associated with treatment effects from the MPATR analysis**

| Node | Phenotype                                                                                                         | Cell type                  | Cell Range | Statistics                                                                                                                                          |
|------|-------------------------------------------------------------------------------------------------------------------|----------------------------|------------|-----------------------------------------------------------------------------------------------------------------------------------------------------|
| 53   | CD3 <sup>+</sup> CD8 <sup>+</sup> CD127 <sup>hi</sup> DAF-FM <sup>+</sup>                                         | CD8 Naive or Memory T Cell | 91 to 3527 | <b>Cox.2</b> , exp(coef) = 2.787, p = 0.047<br><b>Wilc.2</b> , RFS(<1yr, mean = -6.628, SD =0.614), RFS(>1yr, mean = -7.191, SD = 0.642), p = 0.030 |
| 139  | CD3 <sup>+</sup> CD8 <sup>+</sup> CD127 <sup>hi or +/lo</sup> DAF-FM <sup>hi</sup>                                | CD8 Naive or Memory T Cell | 40 to 1863 | <b>Wilc.3</b> , Mean = -0.274, p = 0.024                                                                                                            |
| 172  | CD3 <sup>+</sup> CD8 <sup>hi</sup> CD127 <sup>hi</sup> CD25 <sup>hi</sup> CD11c <sup>hi</sup> DAF-FM <sup>+</sup> | CD8 Naive or Memory T Cell | 14 to 1076 | <b>Wilc.4</b> , RFS(<1yr, median = 0.564), RFS(>1yr, median = -0.206), p = 0.030                                                                    |
| 27   | CD56 <sup>+</sup> CD8 <sup>hi</sup> CD11c <sup>+</sup> DAF-FM <sup>+</sup>                                        | CD8 <sup>+</sup> NK        | 11 to 1113 | <b>Wilc.3</b> , Mean = 0.319, p = 0.014                                                                                                             |
| 122  | CD56 <sup>+</sup> CD8 <sup>+</sup> CD11c <sup>+</sup> CD25 <sup>hi</sup> DAF-FM <sup>+</sup>                      | CD8 <sup>+</sup> NK        | 10 to 2521 | <b>Wilc.3</b> , Mean = 0.343, p = 0.011<br><b>Wilc.4</b> , RFS(<1yr, median = 0.271), RFS(>1yr, median = -0.575), p = 0.037                         |
| 126  | CD56 <sup>+</sup> CD8 <sup>+</sup> CD11c <sup>+</sup> DAF-FM <sup>+</sup>                                         | CD8 <sup>+</sup> NK        | 5 to 1036  | <b>Wilc.3</b> , Mean = 0.382, p = 0.012<br><b>Cox.4</b> , exp(coef) = 1.484, p = 0.040                                                              |
| 132  | CD56 <sup>+</sup> CD8 <sup>hi</sup> CD11c <sup>+</sup> CD25 <sup>hi</sup> DAF-FM <sup>+</sup>                     | CD8 <sup>hi</sup> NK       | 9 to 940   | <b>Wilc.3</b> , Mean = 0.347, p = 0.012                                                                                                             |
| 173  | CD56 <sup>+</sup> CD8 <sup>hi</sup> CD11c <sup>+</sup> CD127 <sup>hi</sup> CD25 <sup>hi</sup> DAF-FM <sup>+</sup> | CD8 <sup>hi</sup> NK       | 1 to 575   | <b>Wilc.3</b> , Mean = 0.352, p = 0.046<br><b>Cox.4</b> , exp(coef) = 1.596, p = 0.029                                                              |
| 14   | CD3 <sup>+</sup> CD8 <sup>+</sup> CD127 <sup>hi</sup> CD25 <sup>hi or +/lo</sup> DAF-FM <sup>+</sup>              | Effector T Cell            | 58 to 4400 | <b>Wilc.3</b> , Mean = -0.300, p = 0.011                                                                                                            |
| 35   | CD3 <sup>+</sup> CD8 <sup>+</sup> CD127 <sup>hi</sup> CD25 <sup>hi</sup> CD11c <sup>hi</sup> DAF-FM <sup>hi</sup> | Effector T Cell            | 29 to 1662 | <b>Wilc.3</b> , Mean = -0.306, p = 0.029                                                                                                            |
| 69   | CD3 <sup>+</sup> CD8 <sup>+</sup> CD127 <sup>hi</sup> DAF-FM <sup>+</sup>                                         | Effector T Cell            | 10 to 1708 | <b>Wilc.3</b> , Mean = -0.370, p = 0.012                                                                                                            |
| 107  | CD3 <sup>+</sup> CD8 <sup>+</sup> CD127 <sup>hi</sup> DAF-FM <sup>hi</sup>                                        | Effector T Cell            | 30 to 2866 | <b>Wilc.3</b> , Mean = -0.281, p = 0.024                                                                                                            |
| 155  | CD3 <sup>+</sup> CD8 <sup>+</sup> CD25 <sup>hi</sup> DAF-FM <sup>+</sup>                                          | Effector T Cell            | 4 to 5945  | <b>Wilc.1</b> , RFS(<1yr, mean = -8.666, SD =0.694), RFS(>1yr, mean = -8.066, SD = 0.956), p = 0.035                                                |
| 164  | CD3 <sup>+</sup> CD8 <sup>+</sup> CD25 <sup>hi</sup> CD11c <sup>hi or +/lo</sup> DAF-FM <sup>hi or +/lo</sup>     | Effector T Cell            | 34 to 2432 | <b>Wilc.3</b> , Mean = -0.233, p = 0.037                                                                                                            |
| 67   | CD3 <sup>+</sup> CD8 <sup>+</sup> CD11c <sup>hi or +/lo</sup> DAF-FM <sup>hi</sup>                                | Effector T Cell            | 31 to 2211 | <b>Wilc.3</b> , Mean = -0.395, p = 0.019                                                                                                            |
| 24   | CD56 <sup>+</sup> CD11c <sup>hi</sup> DAF-FM <sup>+</sup>                                                         | NK Cell                    | 1 to 1096  | <b>Cox.4</b> , exp(coef) = 1.610, p = 0.019<br><b>Wilc.4</b> , RFS(<1yr, median = 0.438), RFS(>1yr, median = -0.506), p = 0.017                     |
| 158  | CD56 <sup>+</sup> CD11c <sup>+</sup> CD127 <sup>hi</sup> CD25 <sup>hi</sup> DAF-FM <sup>+</sup>                   | NK Cell                    | 8 to 850   | <b>Cox.4</b> , exp(coef) = 1.700, p = 0.021                                                                                                         |
| 42   | CD56 <sup>hi</sup> CD11c <sup>+</sup> CD25 <sup>hi</sup> DAF-FM <sup>+</sup>                                      | NK Cell                    | 9 to 720   | <b>Cox.4</b> , exp(coef) = 1.659, p = 0.018<br><b>Wilc.4</b> , RFS(<1yr, median = 0.670), RFS(>1yr, median = -0.444), p = 0.005                     |
| 55   | CD56 <sup>+</sup> CD8 <sup>hi</sup> CD11c <sup>+</sup> CD127 <sup>hi</sup> CD25 <sup>hi</sup> DAF-FM <sup>+</sup> | NK Cell                    | 5 to 878   | <b>Cox.2</b> , exp(coef) = 2.618, p = 0.044<br><b>Cox.4</b> , exp(coef) = 1.898, p = 0.012                                                          |
| 93   | CD56 <sup>hi</sup> CD11c <sup>+</sup> CD25 <sup>hi</sup> DAF-FM <sup>+</sup>                                      | NK Cell                    | 4 to 645   | <b>Cox.4</b> , exp(coef) = 1.574, p = 0.046                                                                                                         |

**Table S3. Lymphoid cell phenotypes (nodes) associated with treatment effects from the MPATR analysis**

| Node | Phenotype                                                                                                                                                  | Cell type         | Cell Range  | Statistics                                                                                                                                           |
|------|------------------------------------------------------------------------------------------------------------------------------------------------------------|-------------------|-------------|------------------------------------------------------------------------------------------------------------------------------------------------------|
| 135  | CD3 <sup>+</sup> CD4 <sup>+/lo</sup> CD56 <sup>+/lo</sup> or <sup>-/lo</sup> CD11c <sup>-lo</sup> CD25 <sup>-lo</sup> DAF-FM <sup>+</sup>                  | NK-like Cell      | 5 to 2468   | <b>Wilc.3</b> , Mean = -0.456, p = 0.044                                                                                                             |
| 174  | CD3 <sup>+</sup> CD8 <sup>+</sup> CD56 <sup>-lo</sup> or <sup>+lo</sup> CD11c <sup>-lo</sup> CD127 <sup>+</sup> CD25 <sup>+lo</sup> DAF-FM <sup>+/lo</sup> | NK-like Cell      | 1 to 475    | <b>Cox.1</b> , exp(coef) = 3.482, p = 0.008<br><b>Wilc.1</b> , RFS(<1yr, mean = -9.840, SD =0.334), RFS(>1yr, mean = -10.243, SD = 0.571), p = 0.009 |
| 159  | CD3 <sup>+</sup> CD4 <sup>+</sup> CD127 <sup>-lo</sup> CD25 <sup>+</sup> DAF-FM <sup>+</sup>                                                               | T Regulatory Cell | 38 to 2525  | <b>Wilc.3</b> , Mean = -0.325, p = 0.029                                                                                                             |
| 200  | CD3 <sup>+</sup> CD4 <sup>+/lo</sup> CD11c <sup>-lo</sup> CD19 <sup>+</sup> CD127 <sup>+/lo</sup> CD25 <sup>+lo</sup> DAF-FM <sup>+</sup>                  | Artifact          | 2 to 156    | <b>Wilc.3</b> , Mean = -0.523, p = 0.021                                                                                                             |
| 13   | CD11c <sup>+</sup> CD25 <sup>-lo</sup> DAF-FM <sup>+/lo</sup>                                                                                              | -                 | 26 to 5650  | <b>Cox.4</b> , exp(coef) = 0.510, p = 0.025                                                                                                          |
| 30   | CD11c <sup>+</sup> CD56 <sup>-lo</sup> CD25 <sup>+lo</sup> DAF-FM <sup>+</sup>                                                                             | -                 | 3 to 1911   | <b>Wilc.3</b> , Mean = 0.283, p = 0.049                                                                                                              |
| 39   | CD11c <sup>+</sup> CD25 <sup>+lo</sup> DAF-FM <sup>+</sup>                                                                                                 | -                 | 34 to 2699  | <b>Wilc.3</b> , Mean = 0.353, p = 0.039                                                                                                              |
| 83   | CD11c <sup>+</sup> CD56 <sup>-lo</sup> CD25 <sup>+lo</sup> DAF-FM <sup>+lo</sup>                                                                           | -                 | 31 to 2390  | <b>Wilc.3</b> , Mean = 0.289, p = 0.024                                                                                                              |
| 98   | CD11c <sup>+</sup> CD4 <sup>-lo</sup> CD56 <sup>- or -/lo</sup> CD25 <sup>+lo</sup> DAF-FM <sup>+</sup>                                                    | -                 | 32 to 11637 | <b>Wilc.3</b> , Mean = 0.375, p = 0.021                                                                                                              |
| 124  | CD11c <sup>-lo or +lo</sup> CD25 <sup>-lo or +lo</sup> DAF-FM <sup>-lo</sup>                                                                               | -                 | 1 to 855    | <b>Wilc.3</b> , Mean = 0.696, p = 0.036<br><b>Wilc.4</b> , RFS(<1yr, median = 0.218), RFS(>1yr, median = -1.041), p = 0.046                          |
| 151  | CD11c <sup>+</sup> CD25 <sup>-lo</sup> DAF-FM <sup>+</sup>                                                                                                 | -                 | 22 to 3483  | <b>Cox.4</b> , exp(coef) = 0.445, p = 0.049<br><b>Wilc.4</b> , RFS(<1yr, median = -1.072), RFS(>1yr, median = -0.042), p = 0.027                     |
| 160  | CD11c <sup>+</sup> CD25 <sup>+</sup> DAF-FM <sup>hi</sup>                                                                                                  | -                 | 6 to 4209   | <b>Wilc.3</b> , Mean = 0.409, p = 0.015                                                                                                              |
| 161  | CD11c <sup>+lo</sup> CD25 <sup>-lo</sup> DAF-FM <sup>+lo</sup>                                                                                             | -                 | 2 to 785    | <b>Wilc.2</b> , RFS(<1yr, mean = -9.266 SD = 0.706), RFS(>1yr, mean = -9.883, SD = 0.790), p = 0.041                                                 |
| 166  | CD11c <sup>+</sup> CD56 <sup>-lo</sup> CD25 <sup>+lo</sup> DAF-FM <sup>+</sup>                                                                             | -                 | 20 to 5854  | <b>Wilc.3</b> , Mean = 0.350, p = 0.027                                                                                                              |
| 167  | CD11c <sup>+</sup> CD25 <sup>-lo or +lo</sup> DAF-FM <sup>+lo</sup>                                                                                        | -                 | 37 to 3753  | <b>Cox.4</b> , exp(coef) = 0.397, p = 0.040                                                                                                          |
| 183  | CD11c <sup>+</sup> CD56 <sup>-lo</sup> CD25 <sup>+</sup> CD3 <sup>-lo</sup> CD4 <sup>- or -/lo</sup> DAF-FM <sup>- or -/lo</sup>                           | -                 | 0 to 633    | <b>Wilc.3</b> , Mean = 0.374, p = 0.037,<br><b>Cox.4</b> , exp(coef) = 0.388, p = 0.005                                                              |
| 189  | CD11c <sup>+</sup> CD25 <sup>+lo</sup> CD56 <sup>-lo</sup> DAF-FM <sup>+</sup>                                                                             | -                 | 0 to 3822   | <b>Wilc.3</b> , Mean = 0.373, p = 0.023                                                                                                              |
| 197  | CD11c <sup>+</sup> CD56 <sup>-lo</sup> CD4 <sup>-lo</sup> CD3 <sup>-lo</sup> CD25 <sup>+lo</sup> DAF-FM <sup>+lo</sup>                                     | -                 | 0 to 690    | <b>Wilc.3</b> , Mean = 0.357, p = 0.012<br><b>Cox.4</b> , exp(coef) = 0.368, p = 0.018                                                               |
| 199  | CD11c <sup>-lo or +lo</sup> CD4 <sup>-lo or +lo</sup> CD25 <sup>-lo</sup> DAF-FM <sup>+</sup>                                                              | -                 | 1 to 256    | <b>Wilc.3</b> , Mean = 0.281, p = 0.042                                                                                                              |

**Table S4. Phenotypic characteristics lymphoid immune cells (nodes) with the addition of scatter properties FSC and SSC associated with treatment effects from the MPATR output.**

| Table S4. Lymphoid FSC/SSC cell phenotypes (nodes) associated with treatment effects from the MPATR analysis |                                                                                                                     |                              |              |                                                                                                                                                                                                                                                                     |
|--------------------------------------------------------------------------------------------------------------|---------------------------------------------------------------------------------------------------------------------|------------------------------|--------------|---------------------------------------------------------------------------------------------------------------------------------------------------------------------------------------------------------------------------------------------------------------------|
| Node                                                                                                         | Phenotype                                                                                                           | Cell type                    | Cell Range   | Statistics                                                                                                                                                                                                                                                          |
| 20                                                                                                           | CD19 <sup>+</sup> CD11c <sup>-/lo</sup> CD25 <sup>-/lo</sup> or +/lo DAF-FM <sup>-/lo</sup> or +/lo                 | B Cell                       | 5 to 1256    | <b>Cox.1</b> , exp(coef) = 2.265, p = 0.018<br><b>Cox.4</b> , exp(coef) = 0.497, p = 0.036                                                                                                                                                                          |
| 29                                                                                                           | CD19 <sup>+</sup> CD11c <sup>-/lo</sup> CD25 <sup>-/lo</sup> or +/lo DAF-FM <sup>-/lo</sup> or +/lo                 | B Cell                       | 23 to 3592   | <b>Cox.1</b> , exp(coef) = 1.851, p = 0.025<br><b>Cox.4</b> , exp(coef) = 0.640, p = 0.023                                                                                                                                                                          |
| 132                                                                                                          | CD19 <sup>+</sup> CD11c <sup>+/lo</sup> CD25 <sup>+/lo</sup> CD56 <sup>- or -/lo</sup> DAF-FM <sup>+</sup>          | B Cell                       | 0 to 722     | <b>Cox.1</b> , exp(coef) = 1.977, p = 0.040                                                                                                                                                                                                                         |
| 197                                                                                                          | CD19 <sup>+</sup> CD11c <sup>+</sup> CD25 <sup>+/lo</sup> DAF-FM <sup>+/lo</sup>                                    | B Cell                       | 5 to 344     | <b>Cox.1</b> , exp(coef) = 2.195, p = 0.034                                                                                                                                                                                                                         |
| 56                                                                                                           | CD19 <sup>+</sup> CD11c <sup>- or -/lo</sup> CD25 <sup>-/lo</sup> or +/lo DAF-FM <sup>-/lo</sup> or +/lo            | B Cell                       | 26 to 1495   | <b>Cox.4</b> , exp(coef) = 0.638, p = 0.048                                                                                                                                                                                                                         |
| 153                                                                                                          | CD19 <sup>+</sup> CD11c <sup>+</sup> CD25 <sup>+/lo</sup> DAF-FM <sup>+/lo</sup>                                    | B Cell                       | 3 to 318     | <b>Cox.1</b> , exp(coef) = 2.013, p = 0.045<br><b>Cox.4</b> , exp(coef) = 0.527, p = 0.017                                                                                                                                                                          |
| 138                                                                                                          | CD19 <sup>+</sup> CD25 <sup>-/lo</sup> DAF-FM <sup>-/lo</sup>                                                       | B Cell                       | 13 to 3392   | <b>Cox.1</b> , exp(coef) = 1.677, p = 0.046                                                                                                                                                                                                                         |
| 91                                                                                                           | CD3 <sup>+</sup> CD4 <sup>+</sup> CD127 <sup>+</sup> CD25 <sup>- or -/lo</sup> DAF-FM <sup>+</sup>                  | CD4 Naive or Memory T Cell   | 118 to 10702 | <b>Wilc.3</b> , Mean = -0.285, p = 0.025                                                                                                                                                                                                                            |
| 61                                                                                                           | CD3 <sup>+</sup> CD4 <sup>+</sup> CD127 <sup>+</sup> or +/lo CD25 <sup>-/lo</sup> or +/lo DAF-FM <sup>+</sup>       | CD4 Naive or Memory T Cell   | 10 to 6148   | <b>Wilc.1</b> , RFS(<1yr, mean = -9.901, SD = 0.439),<br>RFS(>1yr, mean = -9.364, SD = 0.694), p = 0.0096<br><b>Wilc.3</b> , Mean = -0.686, p = 0.0001                                                                                                              |
| 65                                                                                                           | CD3 <sup>+</sup> CD4 <sup>+</sup> CD127 <sup>+/lo</sup> CD25 <sup>-/lo</sup> DAF-FM <sup>+</sup>                    | CD4 Naive or Memory T Cell   | 263 to 6638  | <b>Wilc.3</b> , Mean = -0.298, p = 0.007                                                                                                                                                                                                                            |
| 159                                                                                                          | CD3 <sup>+</sup> CD4 <sup>+</sup> CD127 <sup>+</sup> CD25 <sup>- or -/lo</sup> DAF-FM <sup>+</sup>                  | CD4 Naive or Memory T Cell   | 7 to 8257    | <b>Wilc.1</b> , RFS(<1yr, mean = -9.387, SD = 0.776),<br>RFS(>1yr, mean = -8.501, SD = 0.860), p = 0.011<br><b>Cox.4</b> , exp(coef) = 2.383, p = 0.006<br><b>Wilc.4</b> , RFS(<1yr, median = 1.201),<br>RFS(>1yr, median = 0.025), p = 0.024                       |
| 73                                                                                                           | CD3 <sup>+</sup> CD4 <sup>+</sup> CD127 <sup>+</sup> CD25 <sup>- or -/lo</sup> DAF-FM <sup>+</sup>                  | CD4 Naive or Memory T Cell   | 88 to 13986  | <b>Wilc.3</b> , Mean = -0.393, p = 0.020                                                                                                                                                                                                                            |
| 144                                                                                                          | CD3 <sup>+</sup> CD4 <sup>+/lo</sup> CD127 <sup>- or -/lo</sup> CD25 <sup>-/lo</sup> or +/lo DAF-FM <sup>-/lo</sup> | CD4 T Cell                   | 49 to 2224   | <b>Wilc.3</b> , Mean = -0.531, p = 0.003                                                                                                                                                                                                                            |
| 150                                                                                                          | CD3 <sup>+</sup> CD4 <sup>+</sup> CD127 <sup>-/lo</sup> or +/lo CD25 <sup>+/lo</sup> DAF-FM <sup>+</sup>            | CD4 T Cell                   | 112 to 2198  | <b>Wilc.3</b> , Mean = -0.311, p = 0.024                                                                                                                                                                                                                            |
| 154                                                                                                          | CD3 <sup>+</sup> CD4 <sup>+</sup> CD127 <sup>- or -/lo</sup> CD25 <sup>- or -/lo</sup> DAF-FM <sup>+</sup>          | CD4 T Cell                   | 73 to 3426   | <b>Wilc.3</b> , Mean = -0.671, p = 0.001                                                                                                                                                                                                                            |
| 181                                                                                                          | CD3 <sup>+</sup> CD4 <sup>+</sup> CD127 <sup>-/lo</sup> CD25 <sup>-/lo</sup> DAF-FM <sup>-/lo</sup>                 | CD4 T Cell                   | 128 to 4674  | <b>Wilc.3</b> , Mean = -0.612, p = 0.001                                                                                                                                                                                                                            |
| 54                                                                                                           | CD3 <sup>+</sup> CD8 <sup>-/lo</sup> CD127 <sup>+</sup> CD25 <sup>- or -/lo</sup> DAF-FM <sup>+</sup>               | CD4 CD8 <sup>αβ</sup> T Cell | 16 to 961    | <b>Wilc.4</b> , RFS(<1yr, median = 0.518),<br>RFS(>1yr, median = -0.153), p = 0.030                                                                                                                                                                                 |
| 166                                                                                                          | CD3 <sup>+</sup> CD127 <sup>+</sup> DAF-FM <sup>+</sup>                                                             | CD4 CD8 <sup>αβ</sup> T Cell | 28 to 4434   | <b>Wilc.4</b> , RFS(<1yr, median = 0.454),<br>RFS(>1yr, median = -0.213), p = 0.046                                                                                                                                                                                 |
| 80                                                                                                           | CD3 <sup>+</sup> CD8 <sup>+</sup> CD127 <sup>+</sup> DAF-FM <sup>-/lo</sup>                                         | CD8 Naive or Memory T Cell   | 70 to 4194   | <b>Cox.1</b> , exp(coef) = 3.022, p = 0.032<br><b>Wilc.1</b> , RFS(<1yr, mean = -7.334, SD = 0.404),<br>RFS(>1yr, mean = -7.732, SD = 0.541), p = 0.031<br><b>Wilc.2</b> , RFS(<1yr, mean = -7.210, SD = 0.595),<br>RFS(>1yr, mean = -7.632, SD = 0.577), p = 0.034 |
| 176                                                                                                          | CD3 <sup>+</sup> CD8 <sup>+</sup> CD127 <sup>+</sup> CD11c <sup>- or -/lo</sup> DAF-FM <sup>+/lo</sup>              | CD8 Naive or Memory T Cell   | 30 to 1656   | <b>Wilc.3</b> , Mean = -0.133, p = 0.036                                                                                                                                                                                                                            |

**Table S4. Lymphoid FSC/SSC cell phenotypes (nodes) associated with treatment effects from the MPATR analysis**

| Node | Phenotype                                                                                                                               | Cell type                  | Cell Range  | Statistics                                                                                                                                                                                                                                                    |
|------|-----------------------------------------------------------------------------------------------------------------------------------------|----------------------------|-------------|---------------------------------------------------------------------------------------------------------------------------------------------------------------------------------------------------------------------------------------------------------------|
| 49   | CD3 <sup>+</sup> CD8 <sup>+</sup> CD56 <sup>-/lo</sup> CD127 <sup>+</sup> CD25 <sup>- or -/lo</sup> DAF-FM <sup>+</sup>                 | NK-like Cell               | 125 to 3817 | <b>Wilc.2</b> , RFS(<1yr, mean = -6.239, SD = 0.585), RFS(>1yr, mean = -6.735, SD = 0.553), p = 0.046                                                                                                                                                         |
| 74   | CD3 <sup>+</sup> CD8 <sup>+</sup> CD127 <sup>+</sup> CD25 <sup>- or -/lo</sup> DAF-FM <sup>-/lo</sup>                                   | CD8 Naive or Memory T Cell | 22 to 1067  | <b>Cox.1</b> , exp(coef) = 4.137, p = 0.026<br><b>Wilc.1</b> , RFS(<1yr, mean = -8.151, SD = 0.308), RFS(>1yr, mean = -8.529, SD = 0.472), p = 0.019<br><b>Wilc.2</b> , RFS(<1yr, mean = -8.051, SD = 0.613), RFS(>1yr, mean = -8.492, SD = 0.555), p = 0.030 |
| 121  | CD3 <sup>+</sup> CD8 <sup>+</sup> CD127 <sup>+</sup> CD25 <sup>- or -/lo</sup> DAF-FM <sup>+</sup>                                      | CD8 Naive or Memory T Cell | 38 to 2066  | <b>Wilc.2</b> , RFS(<1yr, mean = -6.965, SD = 0.528), RFS(>1yr, mean = -7.591, SD = 0.680), p = 0.022<br><b>Cox.4</b> , exp(coef) = 2.205, p = 0.041                                                                                                          |
| 41   | CD3 <sup>+</sup> CD8 <sup>+</sup> CD11c <sup>-/lo or +/lo</sup> CD127 <sup>+</sup> CD25 <sup>-/lo</sup> DAF-FM <sup>+</sup>             | CD8 Naive or Memory T Cell | 107 to 3631 | <b>Cox.2</b> , exp(coef) = 3.715, p = 0.046<br><b>Wilc.2</b> , RFS(<1yr, mean = -6.135, SD = 0.554), RFS(>1yr, mean = -6.606, SD = 0.482), p = 0.022                                                                                                          |
| 196  | CD3 <sup>+</sup> CD8 <sup>+</sup> CD127 <sup>-/lo or +/lo</sup> CD25 <sup>-/lo or +/lo</sup> DAF-FM <sup>+</sup>                        | CD8 T Cell                 | 8 to 914    | <b>Wilc.3</b> , Mean = -0.592, p = 0.0002                                                                                                                                                                                                                     |
| 42   | CD56 <sup>+</sup> CD8 <sup>+</sup> CD11c <sup>+</sup> DAF-FM <sup>-/lo</sup>                                                            | CD8 <sup>+</sup> NK        | 4 to 3670   | <b>Wilc.3</b> , Mean = 0.404, p = 0.0130                                                                                                                                                                                                                      |
| 111  | CD56 <sup>+</sup> CD8 <sup>+</sup> CD11c <sup>+</sup> CD127 <sup>+/lo</sup> CD25 <sup>- or -/lo</sup> DAF-FM <sup>+</sup>               | CD8 <sup>+</sup> NK        | 0 to 284    | <b>Wilc.4</b> , RFS(<1yr, median = 1.151), RFS(>1yr, median = -0.460), p = 0.041                                                                                                                                                                              |
| 117  | CD56 <sup>+</sup> CD8 <sup>+</sup> CD11c <sup>+</sup> DAF-FM <sup>+</sup>                                                               | CD8 <sup>+</sup> NK        | 0 to 1029   | <b>Cox.1</b> , exp(coef) = 0.600, p = 0.042<br><b>Wilc.3</b> , Mean = 0.403, p = 0.022<br><b>Cox.4</b> , exp(coef) = 1.568, p = 0.011<br><b>Wilc.4</b> , RFS(<1yr, median = 0.581), RFS(>1yr, median = -0.572), p = 0.012                                     |
| 122  | CD56 <sup>+</sup> CD8 <sup>+</sup> CD11c <sup>-/lo</sup> CD25 <sup>- or -/lo</sup> DAF-FM <sup>+</sup>                                  | CD8 <sup>+</sup> NK        | 19 to 2622  | <b>Cox.4</b> , exp(coef) = 1.543, p = 0.031<br><b>Wilc.4</b> , RFS(<1yr, median = 0.553), RFS(>1yr, median = -0.249), p = 0.041                                                                                                                               |
| 129  | CD56 <sup>+</sup> CD8 <sup>+</sup> CD11c <sup>+</sup> CD25 <sup>- or -/lo</sup> DAF-FM <sup>+</sup>                                     | CD8 <sup>+</sup> NK        | 16 to 1593  | <b>Wilc.3</b> , Mean = 0.339, p = 0.012                                                                                                                                                                                                                       |
| 142  | CD56 <sup>+</sup> CD8 <sup>+</sup> CD11c <sup>+</sup> DAF-FM <sup>+</sup>                                                               | CD8 <sup>+</sup> NK        | 4 to 1505   | <b>Wilc.3</b> , Mean = 0.306, p = 0.027                                                                                                                                                                                                                       |
| 17   | CD56 <sup>+</sup> CD8 <sup>+/lo</sup> CD11c <sup>+</sup> CD25 <sup>-/lo</sup> DAF-FM <sup>+</sup>                                       | CD8 <sup>+/lo</sup> NK     | 31 to 2860  | <b>Wilc.3</b> , Mean = 0.233, p = 0.042<br><b>Cox.4</b> , exp(coef) = 1.528, p = 0.032                                                                                                                                                                        |
| 118  | CD56 <sup>+</sup> CD8 <sup>+/lo</sup> CD11c <sup>+</sup> DAF-FM <sup>-/lo</sup>                                                         | CD8 <sup>+/lo</sup> NK     | 7 to 3856   | <b>Wilc.3</b> , Mean = 0.289, p = 0.048                                                                                                                                                                                                                       |
| 23   | CD3 <sup>+</sup> CD8 <sup>+</sup> DAF-FM <sup>-/lo</sup>                                                                                | Effector T Cell            | 59 to 2405  | <b>Wilc.3</b> , Mean = -0.343, p = 0.010                                                                                                                                                                                                                      |
| 47   | CD3 <sup>+</sup> CD8 <sup>+</sup> CD127 <sup>- or -/lo</sup> CD25 <sup>- or -/lo</sup> DAF-FM <sup>-/lo</sup>                           | Effector T Cell            | 36 to 2730  | <b>Wilc.3</b> , Mean = -0.337, p = 0.033                                                                                                                                                                                                                      |
| 133  | CD3 <sup>+</sup> CD8 <sup>+</sup> CD127 <sup>- or -/lo</sup> DAF-FM <sup>-/lo</sup>                                                     | Effector T Cell            | 29 to 2135  | <b>Wilc.3</b> , Mean = -0.339, p = 0.030                                                                                                                                                                                                                      |
| 188  | CD3 <sup>+</sup> CD8 <sup>+</sup> CD127 <sup>- or -/lo</sup> CD25 <sup>- or -/lo</sup> DAF-FM <sup>-/lo</sup>                           | Effector T Cell            | 15 to 1536  | <b>Wilc.3</b> , Mean = -0.269, p = 0.023                                                                                                                                                                                                                      |
| 36   | CD56 <sup>+</sup> CD8 <sup>- or -/lo</sup> CD11c <sup>+</sup> CD127 <sup>+/lo</sup> CD25 <sup>- or -/lo</sup> DAF-FM <sup>+</sup>       | NK Cell                    | 10 to 1239  | <b>Wilc.3</b> , Mean = 0.242, p = 0.040                                                                                                                                                                                                                       |
| 94   | CD56 <sup>+</sup> CD8 <sup>-/lo or +/lo</sup> CD11c <sup>+</sup> DAF-FM <sup>+</sup>                                                    | NK Cell                    | 11 to 1218  | <b>Cox.4</b> , exp(coef) = 1.511, p = 0.043                                                                                                                                                                                                                   |
| 128  | CD56 <sup>+</sup> CD8 <sup>- or -/lo</sup> CD11c <sup>+</sup> CD127 <sup>-/lo</sup> CD25 <sup>-/lo</sup> DAF-FM <sup>-/lo or +/lo</sup> | NK Cell                    | 0 to 436    | <b>Wilc.3</b> , Mean = 0.404, p = 0.014                                                                                                                                                                                                                       |

**Table S4. Lymphoid FSC/SSC cell phenotypes (nodes) associated with treatment effects from the MPATR analysis**

| Node | Phenotype                                                                                                                                       | Cell type         | Cell Range  | Statistics                                                                                                                                                                                                                                                                                                                          |
|------|-------------------------------------------------------------------------------------------------------------------------------------------------|-------------------|-------------|-------------------------------------------------------------------------------------------------------------------------------------------------------------------------------------------------------------------------------------------------------------------------------------------------------------------------------------|
| 148  | CD56 <sup>+</sup> CD11c <sup>+</sup> CD25 <sup>-</sup> or <sup>-</sup> DAF-FM <sup>+</sup>                                                      | NK Cell           | 10 to 990   | <b>Cox.4</b> , exp(coef) = 1.678, p = 0.0496<br><b>Wilc.4</b> , RFS(<1yr, median = 0.143), RFS(>1yr, median = -0.332), p = 0.019                                                                                                                                                                                                    |
| 8    | CD3 <sup>+</sup> CD56 <sup>+</sup> CD11c <sup>-</sup> CD25 <sup>-</sup> or <sup>-</sup> DAF-FM <sup>-</sup>                                     | NK-like Cell      | 1 to 1311   | <b>Cox.4</b> , exp(coef) = 0.584, p = 0.047                                                                                                                                                                                                                                                                                         |
| 43   | CD3 <sup>+</sup> CD8 <sup>+</sup> CD25 <sup>-</sup> CD11c <sup>-</sup> or <sup>-</sup> CD56 <sup>-</sup> CD127 <sup>+</sup> DAF-FM <sup>+</sup> | NK-like Cell      | 0 to 248    | <b>Wilc.1</b> , RFS(<1yr, mean = -10.565, SD = 0.430), RFS(>1yr, mean = -10.989, SD = 0.549), p = 0.038                                                                                                                                                                                                                             |
| 2    | CD3 <sup>+</sup> CD4 <sup>+</sup> CD25 <sup>+</sup> CD127 <sup>-</sup> DAF-FM <sup>-</sup>                                                      | T Regulatory Cell | 28 to 3082  | <b>Cox.1</b> , exp(coef) = 2.146, p = 0.039<br><b>Wilc.3</b> , Mean = -0.419, p = 0.017<br><b>Cox.4</b> , exp(coef) = 0.547, p = 0.033                                                                                                                                                                                              |
| 160  | CD3 <sup>+</sup> CD19 <sup>+</sup> CD4 <sup>+</sup> CD11c <sup>-</sup> CD127 <sup>+</sup> DAF-FM <sup>+</sup>                                   | Artifact          | 2 to 136    | <b>Wilc.3</b> , Mean = -0.455, p = 0.025                                                                                                                                                                                                                                                                                            |
| 4    | CD11c <sup>-</sup> CD25 <sup>+</sup> DAF-FM <sup>+</sup>                                                                                        | -                 | 1 to 302    | <b>Wilc.2</b> , RFS(<1yr, mean = -11.227, SD = 0.982), RFS(>1yr, mean = -12.143, SD = 1.063), p = 0.034<br><b>Wilc.3</b> , Mean = 0.452, p = 0.042<br><b>Cox.4</b> , exp(coef) = 1.661, p = 0.032<br><b>Wilc.4</b> , RFS(<1yr, median = 0.372), RFS(>1yr, median = -0.607), p = 0.005                                               |
| 18   | CD3 <sup>-</sup> CD4 <sup>-</sup> CD11c <sup>+</sup> CD25 <sup>+</sup> CD56 <sup>-</sup> DAF-FM <sup>-</sup>                                    | -                 | 4 to 1518   | <b>Cox.1</b> , exp(coef) = 1.936, p = 0.041<br><b>Wilc.1</b> , RFS(<1yr, mean = -9.112, SD = 0.779), RFS(>1yr, mean = -9.634, SD = 0.723), p = 0.044<br><b>Wilc.3</b> , Mean = 0.400, p = 0.012<br><b>Cox.4</b> , exp(coef) = 0.405, p = 0.008<br><b>Wilc.4</b> , RFS(<1yr, median = -1.091), RFS(>1yr, median = -0.338), p = 0.037 |
| 21   | CD11c <sup>+</sup> CD25 <sup>-</sup> or <sup>-</sup> DAF-FM <sup>+</sup>                                                                        | -                 | 87 to 10155 | <b>Cox.4</b> , exp(coef) = 0.468, p = 0.035<br><b>Wilc.4</b> , RFS(<1yr, median = -0.878), RFS(>1yr, median = -0.070), p = 0.0457                                                                                                                                                                                                   |
| 24   | CD11c <sup>+</sup> CD56 <sup>-</sup> CD25 <sup>+</sup> DAF-FM <sup>-</sup> or <sup>-</sup>                                                      | -                 | 3 to 1893   | <b>Wilc.3</b> , Mean = 0.367, p = 0.028                                                                                                                                                                                                                                                                                             |
| 27   | CD11c <sup>-</sup> CD25 <sup>-</sup> or <sup>-</sup> DAF-FM <sup>+</sup>                                                                        | -                 | 17 to 388   | <b>Wilc.3</b> , Mean = 0.250, p = 0.025                                                                                                                                                                                                                                                                                             |
| 28   | CD11c <sup>+</sup> CD25 <sup>+</sup> CD56 <sup>-</sup> DAF-FM <sup>+</sup>                                                                      | -                 | 10 to 10882 | <b>Wilc.3</b> , Mean = 0.346, p = 0.049                                                                                                                                                                                                                                                                                             |
| 31   | CD11c <sup>-</sup> or <sup>-</sup> CD25 <sup>-</sup> DAF-FM <sup>-</sup> or <sup>-</sup>                                                        | -                 | 3 to 1185   | <b>Wilc.4</b> , RFS(<1yr, median = 0.540), RFS(>1yr, median = -0.491), p = 0.048                                                                                                                                                                                                                                                    |
| 50   | CD11c <sup>+</sup> CD56 <sup>-</sup> or <sup>-</sup> CD8 <sup>-</sup> CD25 <sup>+</sup> DAF-FM <sup>+</sup>                                     | -                 | 0 to 9911   | <b>Wilc.3</b> , Mean = 0.437, p = 0.046                                                                                                                                                                                                                                                                                             |
| 51   | CD11c <sup>+</sup> CD25 <sup>+</sup> CD4 <sup>-</sup> or <sup>-</sup> DAF-FM <sup>+</sup>                                                       | -                 | 10 to 3509  | <b>Wilc.3</b> , Mean = 0.411, p = 0.014                                                                                                                                                                                                                                                                                             |
| 55   | CD11c <sup>+</sup> CD25 <sup>+</sup> CD4 <sup>-</sup> or <sup>-</sup> DAF-FM <sup>+</sup>                                                       | -                 | 8 to 3024   | <b>Wilc.3</b> , Mean = 0.422, p = 0.011                                                                                                                                                                                                                                                                                             |
| 58   | CD11c <sup>+</sup> CD25 <sup>+</sup> CD56 <sup>-</sup> or <sup>-</sup> CD4 <sup>-</sup> or <sup>-</sup> DAF-FM <sup>+</sup>                     | -                 | 21 to 1379  | <b>Wilc.3</b> , Mean = 0.253, p = 0.034                                                                                                                                                                                                                                                                                             |
| 62   | CD11c <sup>+</sup> CD25 <sup>+</sup> CD4 <sup>-</sup> or <sup>-</sup> DAF-FM <sup>+</sup>                                                       | -                 | 0 to 1618   | <b>Wilc.1</b> , RFS(<1yr, mean = -12.077, SD = 0.638), RFS(>1yr, mean = -11.538, SD = 0.781), p = 0.033                                                                                                                                                                                                                             |
| 103  | CD11c <sup>-</sup> CD25 <sup>-</sup> or <sup>-</sup> DAF-FM <sup>+</sup>                                                                        | -                 | 2 to 2042   | <b>Wilc.3</b> , Mean = 0.708, p = 0.036                                                                                                                                                                                                                                                                                             |
| 156  | CD11c <sup>+</sup> CD25 <sup>+</sup> CD56 <sup>-</sup> or <sup>-</sup> CD8 <sup>-</sup> or <sup>-</sup> DAF-FM <sup>+</sup>                     | -                 | 16 to 5428  | <b>Wilc.3</b> , Mean = 0.328, p = 0.044                                                                                                                                                                                                                                                                                             |

**Table S4. Lymphoid FSC/SSC cell phenotypes (nodes) associated with treatment effects from the MPATR analysis**

| <b>Node</b> | <b>Phenotype</b>                                                            | <b>Cell type</b> | <b>Cell Range</b> | <b>Statistics</b>                                                                                                                   |
|-------------|-----------------------------------------------------------------------------|------------------|-------------------|-------------------------------------------------------------------------------------------------------------------------------------|
| 170         | CD11c <sup>+</sup> CD25 <sup>hi</sup> DAF-FM <sup>lo</sup>                  | -                | 13 to 2930        | <b>Cox.4</b> , exp(coef) = 0.468, p = 0.015                                                                                         |
| 182         | CD11c <sup>+</sup> CD25 <sup>lo</sup> DAF-FM <sup>lo</sup> or <sup>hi</sup> | -                | 2 to 761          | <b>Wilc.3</b> , Mean = 0.334, p = 0.031                                                                                             |
| 191         | CD11c <sup>+</sup> CD25 <sup>lo</sup> DAF-FM <sup>hi</sup>                  | -                | 2 to 2451         | <b>Cox.4</b> , exp(coef) = 0.309, p = 0.015<br><b>Wilc.4</b> , RFS(<1yr, median = -0.925),<br>RFS(>1yr, median = -0.033), p = 0.013 |

**Table S5. Phenotypic characteristics of myeloid immune cells (nodes) associated with treatment effects from the MPATR output.**

| Table S5. Myeloid cell phenotypes (nodes) associated with treatment effects from the MPATR analysis |                                                                                                                                                               |                                          |            |                                                                                                                                                                                                                                                                                           |
|-----------------------------------------------------------------------------------------------------|---------------------------------------------------------------------------------------------------------------------------------------------------------------|------------------------------------------|------------|-------------------------------------------------------------------------------------------------------------------------------------------------------------------------------------------------------------------------------------------------------------------------------------------|
| Node                                                                                                | Phenotype                                                                                                                                                     | Cell Type                                | Cell Range | Statistics                                                                                                                                                                                                                                                                                |
| 47                                                                                                  | HLA-DR <sup>+</sup> CD33 <sup>-/lo</sup> or <sup>+/lo</sup> CD11b <sup>+</sup> CD11c <sup>+</sup> CD14 <sup>-/lo</sup> DAF-FM <sup>+/lo</sup>                 | Dendritic Cell                           | 1 to 1709  | <b>Cox.1</b> , exp(coef) = 1.882, p = 0.037<br><b>Cox.4</b> , exp(coef) = 0.599, p = 0.036                                                                                                                                                                                                |
| 49                                                                                                  | HLA-DR <sup>+</sup> CD33 <sup>+</sup> CD11b <sup>+</sup> CD11c <sup>+</sup> DAF-FM <sup>+</sup>                                                               | Dendritic Cell                           | 0 to 640   | <b>Wilc.3</b> , Mean = 0.510, p = 0.004                                                                                                                                                                                                                                                   |
| 108                                                                                                 | HLA-DR <sup>+/lo</sup> CD33 <sup>-/lo</sup> or <sup>+/lo</sup> CD11b <sup>+</sup> CD11c <sup>+</sup> DAF-FM <sup>+</sup>                                      | Dendritic Cell                           | 0 to 1211  | <b>Wilc.3</b> , Mean = 0.370, p = 0.022<br><b>Wilc.4</b> , RFS(<1yr, median = -1.244), RFS(>1yr, median = -0.654), p = 0.046                                                                                                                                                              |
| 125                                                                                                 | HLA-DR <sup>+</sup> CD33 <sup>+/lo</sup> CD11b <sup>+/lo</sup> CD11c <sup>+</sup> DAF-FM <sup>+/lo</sup>                                                      | Dendritic Cell                           | 17 to 2449 | <b>Cox.4</b> , exp(coef) = 0.445, p = 0.021<br><b>Wilc.4</b> , RFS(<1yr, median = -1.244), RFS(>1yr, median = -0.235), p = 0.024                                                                                                                                                          |
| 129                                                                                                 | HLA-DR <sup>-/lo</sup> CD33 <sup>+/lo</sup> CD11b <sup>+</sup> CD11c <sup>+</sup> DAF-FM <sup>+</sup>                                                         | Dendritic Cell                           | 0 to 878   | <b>Cox.4</b> , exp(coef) = 1.656, p = 0.029<br><b>Wilc.4</b> , RFS(<1yr, median = 0.604), RFS(>1yr, median = -0.861), p = 0.012                                                                                                                                                           |
| 150                                                                                                 | HLA-DR <sup>+</sup> CD33 <sup>-/lo</sup> or <sup>+/lo</sup> CD11b <sup>+</sup> CD11c <sup>+</sup> CD14 <sup>-/lo</sup> or <sup>+/lo</sup> DAF-FM <sup>+</sup> | Dendritic Cell                           | 14 to 598  | <b>Cox.4</b> , exp(coef) = 0.388, p = 0.045                                                                                                                                                                                                                                               |
| 153                                                                                                 | HLA-DR <sup>-/lo</sup> CD33 <sup>-/lo</sup> or <sup>+/lo</sup> CD11b <sup>+</sup> CD11c <sup>+</sup> DAF-FM <sup>+/lo</sup> or <sup>+/lo</sup>                | Dendritic Cell                           | 1 to 1463  | <b>Cox.4</b> , exp(coef) = 0.452, p = 0.038                                                                                                                                                                                                                                               |
| 178                                                                                                 | HLA-DR <sup>+</sup> CD33 <sup>+</sup> CD11b <sup>+</sup> CD11c <sup>+</sup> CD14 <sup>-/lo</sup> DAF-FM <sup>+/lo</sup>                                       | Dendritic Cell                           | 1 to 2985  | <b>Cox.4</b> , exp(coef) = 0.360, p = 0.016                                                                                                                                                                                                                                               |
| 14                                                                                                  | HLA-DR <sup>+</sup> CD33 <sup>-/lo</sup> or <sup>+/lo</sup> CD11b <sup>+</sup> CD11c <sup>+</sup> CD14 <sup>-/lo</sup> DAF-FM <sup>+</sup>                    | Monocytic                                | 3 to 1065  | <b>Cox.1</b> , exp(coef) = 3.592, p = 0.013<br><b>Wilc.1</b> , RFS(<1yr, mean = -9.772, SD = 0.615), RFS(>1yr, mean = -10.328, SD = 0.501), p = 0.014                                                                                                                                     |
| 18                                                                                                  | HLA-DR <sup>+</sup> CD33 <sup>+</sup> CD11b <sup>+</sup> CD11c <sup>+</sup> CD14 <sup>+</sup> DAF-FM <sup>+</sup>                                             | Monocytic                                | 12 to 3609 | <b>Cox.4</b> , exp(coef) = 0.610, p = 0.023                                                                                                                                                                                                                                               |
| 32                                                                                                  | HLA-DR <sup>+</sup> CD33 <sup>+</sup> CD11b <sup>+</sup> CD11c <sup>+</sup> CD14 <sup>+</sup> DAF-FM <sup>+/lo</sup>                                          | Monocytic                                | 1 to 2449  | <b>Cox.4</b> , exp(coef) = 0.492, p = 0.022                                                                                                                                                                                                                                               |
| 66                                                                                                  | HLA-DR <sup>+</sup> CD33 <sup>+</sup> CD11b <sup>+</sup> CD11c <sup>+</sup> CD14 <sup>+</sup> DAF-FM <sup>+</sup>                                             | Monocytic                                | 24 to 4261 | <b>Wilc.3</b> , Mean = 0.440, p = 0.025                                                                                                                                                                                                                                                   |
| 78                                                                                                  | HLA-DR <sup>+</sup> CD33 <sup>+</sup> CD11b <sup>+</sup> CD11c <sup>+</sup> CD14 <sup>+/lo</sup> DAF-FM <sup>+/lo</sup>                                       | Monocytic                                | 0 to 2619  | <b>Wilc.1</b> , RFS(<1yr, mean = -9.348, SD = 0.851), RFS(>1yr, mean = -10.140, SD = 1.179), p = 0.033<br><b>Cox.4</b> , exp(coef) = 0.643, p = 0.029<br><b>Wilc.4</b> , RFS(<1yr, median = -1.289), RFS(>1yr, median = -0.243), p = 0.037                                                |
| 134                                                                                                 | HLA-DR <sup>+</sup> CD33 <sup>+</sup> CD11b <sup>+</sup> CD11c <sup>+</sup> CD14 <sup>+</sup> DAF-FM <sup>+</sup> or <sup>+/lo</sup>                          | Monocytic                                | 2 to 3005  | <b>Wilc.3</b> , Mean = 0.456, p = 0.012                                                                                                                                                                                                                                                   |
| 137                                                                                                 | HLA-DR <sup>+</sup> CD33 <sup>+</sup> CD11b <sup>+</sup> CD11c <sup>+</sup> CD14 <sup>+</sup> DAF-FM <sup>+/lo</sup>                                          | Monocytic                                | 50 to 1595 | <b>Cox.1</b> , exp(coef) = 1.873, p = 0.039<br><b>Wilc.1</b> , RFS(<1yr, mean = -9.877, SD = 0.992), RFS(>1yr, mean = -10.522, SD = 0.778), p = 0.038<br><b>Cox.4</b> , exp(coef) = 0.492, p = 0.009<br><b>Wilc.4</b> , RFS(<1yr, median = -0.618), RFS(>1yr, median = -0.011), p = 0.041 |
| 167                                                                                                 | HLA-DR <sup>+</sup> CD33 <sup>+</sup> CD11b <sup>+</sup> CD11c <sup>+</sup> CD14 <sup>+</sup> DAF-FM <sup>+</sup>                                             | Monocytic                                | 19 to 3956 | <b>Wilc.1</b> , RFS(<1yr, mean = -8.394, SD = 1.168), RFS(>1yr, mean = -9.340, SD = 1.125), p = 0.028<br><b>Cox.4</b> , exp(coef) = 0.488, p = 0.021                                                                                                                                      |
| 155                                                                                                 | HLA-DR <sup>+</sup> CD33 <sup>+/lo</sup> CD11b <sup>-/lo</sup> CD11c <sup>+</sup> DAF-FM <sup>+/lo</sup>                                                      | Plasmacytoid DC (CD11b <sup>-/lo</sup> ) | 4 to 786   | <b>Cox.4</b> , exp(coef) = 0.450, p = 0.021<br><b>Wilc.4</b> , RFS(<1yr, median = -0.787), RFS(>1yr, median = -0.050), p = 0.019                                                                                                                                                          |
| 185                                                                                                 | HLA-DR <sup>+</sup> CD33 <sup>+</sup> CD11c <sup>+</sup> DAF-FM <sup>+</sup>                                                                                  | Plasmacytoid DC (CD11b <sup>-</sup> )    | 1 to 759   | <b>Wilc.1</b> , RFS(<1yr, mean = -12.297, SD = 0.856), RFS(>1yr, mean = -12.879, SD = 0.821), p = 0.047                                                                                                                                                                                   |
| 1                                                                                                   | HLA-DR <sup>+</sup> DAF-FM <sup>+</sup>                                                                                                                       | -                                        | 6 to 2076  | <b>Wilc.3</b> , Mean = -0.487, p = 0.018                                                                                                                                                                                                                                                  |
| 10                                                                                                  | CD11b <sup>+</sup> CD11c <sup>+</sup> HLA-DR <sup>-/lo</sup> DAF-FM <sup>-/lo</sup>                                                                           | -                                        | 0 to 881   | <b>Wilc.3</b> , Mean = 0.315, p = 0.042                                                                                                                                                                                                                                                   |

**Table S5. Myeloid cell phenotypes (nodes) associated with treatment effects from the MPATR analysis**

| Node | Phenotype                                                                                   | Cell Type | Cell Range   | Test                                                                                                                                                                        |
|------|---------------------------------------------------------------------------------------------|-----------|--------------|-----------------------------------------------------------------------------------------------------------------------------------------------------------------------------|
| 11   | HLA-DR <sup>-lo</sup> or - DAF-FM*                                                          | -         | 113 to 18203 | <b>Cox.4</b> , exp(coef) = 2.168, p = 0.016                                                                                                                                 |
| 13   | CD11b <sup>+lo</sup> HLA-DR <sup>+lo</sup> DAF-FM*                                          | -         | 45 to 1623   | <b>Wilc.3</b> , Mean = -0.465, p = 0.003                                                                                                                                    |
| 24   | CD11b <sup>- or -lo</sup> HLA-DR <sup>- or -lo</sup> DAF-FM <sup>- or -lo</sup>             | -         | 115 to 11180 | <b>Cox.1</b> , exp(coef) = 2.220, p = 0.013                                                                                                                                 |
| 27   | HLA-DR <sup>-lo</sup> or +/lo DAF-FM*                                                       | -         | 121 to 3260  | <b>Wilc.3</b> , Mean = -0.374, p = 0.034                                                                                                                                    |
| 35   | CD11b*CD11c*HLA-DR <sup>- or -lo</sup> DAF-FM*                                              | -         | 40 to 4978   | <b>Wilc.3</b> , Mean = 0.295, p = 0.034<br><b>Cox.4</b> , exp(coef) = 1.484, p = 0.036<br><b>Wilc.4</b> , RFS(<1yr, median = -0.045), RFS(>1yr, median = -0.607), p = 0.030 |
| 36   | CD11b*CD11c*HLA-DR <sup>-lo</sup> or +/lo DAF-FM*                                           | -         | 1 to 5539    | <b>Wilc.3</b> , Mean = 0.476, p = 0.020                                                                                                                                     |
| 37   | CD11b <sup>- or -lo</sup> CD11c <sup>- or -lo</sup> DAF-FM*                                 | -         | 53 to 22078  | <b>Cox.4</b> , exp(coef) = 2.232, p = 0.017                                                                                                                                 |
| 40   | CD11b <sup>-lo</sup> CD11c <sup>-lo</sup> HLA-DR*DAF-FM <sup>-lo</sup>                      | -         | 22 to 1960   | <b>Cox.1</b> , exp(coef) = 2.468, p = 0.011<br><b>Cox.4</b> , exp(coef) = 0.502, p = 0.138                                                                                  |
| 41   | CD11b*CD11c <sup>+lo</sup> HLA-DR <sup>+lo</sup> DAF-FM*                                    | -         | 26 to 2742   | <b>Wilc.2</b> , RFS(<1yr, mean = -7.845, SD = 0.456), RFS(>1yr, mean = -7.385, SD = 0.513), p = 0.019                                                                       |
| 43   | DAF-FM <sup>-lo</sup>                                                                       | -         | 97 to 5628   | <b>Cox.1</b> , exp(coef) = 2.538, p = 0.015                                                                                                                                 |
| 45   | DAF-FM*                                                                                     | -         | 109 to 29376 | <b>Cox.4</b> , exp(coef) = 2.391, p = 0.006                                                                                                                                 |
| 46   | CD11b <sup>-lo</sup> HLA-DR <sup>+lo</sup> DAF-FM*                                          | -         | 110 to 5738  | <b>Wilc.3</b> , Mean = -0.527, p = 0.003                                                                                                                                    |
| 48   | HLA-DR <sup>+ or +/lo</sup> DAF-FM*                                                         | -         | 19 to 2039   | <b>Wilc.3</b> , Mean = -0.508, p = 0.011                                                                                                                                    |
| 52   | CD11b*CD11c <sup>-lo</sup> or +/lo CD33 <sup>-lo</sup> HLA-DR*DAF-FM <sup>-lo</sup> or +/lo | -         | 6 to 4031    | <b>Cox.2</b> , exp(coef) = 0.204, p = 0.022<br><b>Wilc.2</b> , RFS(<1yr, mean = -8.951, SD = 0.669), RFS(>1yr, mean = -8.416, SD = 0.634), p = 0.017                        |
| 59   | CD11c <sup>- or -lo</sup> HLA-DR <sup>- or -lo</sup> DAF-FM <sup>-lo</sup>                  | -         | 179 to 12508 | <b>Cox.1</b> , exp(coef) = 2.769, p = 0.014                                                                                                                                 |
| 61   | CD11c <sup>- or -lo</sup> HLA-DR <sup>-lo</sup> or +/lo DAF-FM <sup>+lo</sup>               | -         | 22 to 1774   | <b>Wilc.3</b> , Mean = -0.442, p = 0.004                                                                                                                                    |
| 67   | CD11b*CD11c*HLA-DR <sup>-lo</sup> DAF-FM*                                                   | -         | 25 to 7372   | <b>Cox.4</b> , exp(coef) = 1.549, p = 0.020                                                                                                                                 |
| 68   | DAF-FM <sup>- or -lo</sup>                                                                  | -         | 117 to 7657  | <b>Cox.1</b> , exp(coef) = 2.281, p = 0.026                                                                                                                                 |
| 70   | CD11b*HLA-DR <sup>+ or +/lo</sup> DAF-FM <sup>+ or +/lo</sup>                               | -         | 4 to 2338    | <b>Wilc.2</b> , RFS(<1yr, mean = -9.629, SD = 0.921), RFS(>1yr, mean = -8.917, SD = 0.540), p = 0.0373                                                                      |
| 75   | CD11b <sup>- or -lo</sup> HLA-DR*DAF-FM <sup>- or -lo</sup>                                 | -         | 49 to 5177   | <b>Wilc.3</b> , Mean = -0.501, p = 0.008                                                                                                                                    |



**Table S5. Myeloid cell phenotypes (nodes) associated with treatment effects from the MPATR analysis**

| Node | Phenotype                                                                                                             | Cell Type | Cell Range   | Test                                                                                                                                                   |
|------|-----------------------------------------------------------------------------------------------------------------------|-----------|--------------|--------------------------------------------------------------------------------------------------------------------------------------------------------|
| 76   | DAF-FM <sup>+</sup>                                                                                                   | -         | 434 to 11915 | <b>Cox.4</b> , exp(coef) = 1.915, p = 0.037                                                                                                            |
| 80   | CD11b <sup>-lo</sup> or <sup>+lo</sup> HLA-DR <sup>+</sup> DAF-FM <sup>+lo</sup>                                      | -         | 8 to 1476    | <b>Wilc.3</b> , Mean = -0.345, p = 0.044                                                                                                               |
| 85   | HLA-DR <sup>+</sup> DAF-FM <sup>+lo</sup>                                                                             | -         | 23 to 908    | <b>Cox.4</b> , exp(coef) = 0.543, p = 0.029                                                                                                            |
| 86   | CD11b <sup>+</sup> CD11c <sup>+</sup> CD33 <sup>-lo</sup> HLA-DR <sup>+lo</sup> DAF-FM <sup>-lo</sup>                 | -         | 0 to 1375    | <b>Cox.4</b> , exp(coef) = 0.425, p = 0.027                                                                                                            |
| 89   | CD11b <sup>-lo</sup> HLA-DR <sup>+</sup> DAF-FM <sup>-lo</sup>                                                        | -         | 14 to 2018   | <b>Cox.1</b> , exp(coef) = 1.918, p = 0.037<br><b>Cox.4</b> , exp(coef) = 0.636, p = 0.042                                                             |
| 90   | CD11b <sup>+</sup> CD11c <sup>+</sup> DAF-FM <sup>+</sup>                                                             | -         | 0 to 2635    | <b>Wilc.3</b> , Mean = 0.379, p = 0.049<br><b>Cox.4</b> , exp(coef) = 1.571, p = 0.034                                                                 |
| 95   | HLA-DR <sup>-lo</sup> or <sup>+lo</sup> DAF-FM <sup>-lo</sup>                                                         | -         | 52 to 3216   | <b>Cox.1</b> , exp(coef) = 2.029, p = 0.028                                                                                                            |
| 96   | HLA-DR <sup>+</sup> DAF-FM <sup>-lo</sup>                                                                             | -         | 51 to 3763   | <b>Cox.4</b> , exp(coef) = 0.593, p = 0.022                                                                                                            |
| 105  | CD11b <sup>-lo</sup> or <sup>+lo</sup> CD11c <sup>-lo</sup> HLA-DR <sup>+</sup> DAF-FM <sup>-lo</sup>                 | -         | 3 to 2259    | <b>Cox.4</b> , exp(coef) = 0.643, p = 0.033                                                                                                            |
| 112  | DAF-FM <sup>+</sup>                                                                                                   | -         | 11 to 9443   | <b>Cox.4</b> , exp(coef) = 2.213, p = 0.034                                                                                                            |
| 114  | CD11b <sup>+</sup> CD11c <sup>+</sup> DAF-FM <sup>-lo</sup>                                                           | -         | 4 to 3092    | <b>Wilc.3</b> , Mean = 0.316, p = 0.017                                                                                                                |
| 120  | HLA-DR <sup>- or -lo</sup> DAF-FM <sup>-lo</sup>                                                                      | -         | 103 to 6237  | <b>Cox.1</b> , exp(coef) = 2.208, p = 0.013                                                                                                            |
| 121  | CD11c <sup>-lo</sup> HLA-DR <sup>-lo</sup> DAF-FM <sup>+</sup>                                                        | -         | 98 to 2445   | <b>Cox.1</b> , exp(coef) = 2.694, p = 0.041                                                                                                            |
| 122  | CD11b <sup>+</sup> or <sup>+lo</sup> DAF-FM <sup>+</sup>                                                              | -         | 1 to 4039    | <b>Cox.4</b> , exp(coef) = 1.944, p = 0.029                                                                                                            |
| 123  | CD11b <sup>-lo</sup> CD11c <sup>-lo</sup> HLA-DR <sup>+</sup> DAF-FM <sup>+</sup>                                     | -         | 85 to 2701   | <b>Wilc.3</b> , Mean = -0.334, p = 0.030<br><b>Cox.4</b> , exp(coef) = 0.572, p = 0.038                                                                |
| 133  | CD11c <sup>-lo</sup> HLA-DR <sup>+</sup> DAF-FM <sup>-lo</sup> or <sup>+lo</sup>                                      | -         | 2 to 693     | <b>Cox.4</b> , exp(coef) = 0.610, p = 0.028                                                                                                            |
| 142  | CD11b <sup>+</sup> CD11c <sup>+</sup> HLA-DR <sup>-lo</sup> DAF-FM <sup>-lo</sup>                                     | -         | 0 to 778     | <b>Wilc.3</b> , Mean = 0.282, p = 0.024                                                                                                                |
| 160  | CD11b <sup>+</sup> CD11c <sup>+</sup> CD33 <sup>-lo</sup> HLA-DR <sup>+</sup> DAF-FM <sup>-lo</sup> or <sup>+lo</sup> | -         | 7 to 2355    | <b>Wilc.2</b> , RFS(<1yr, mean = -9.984, SD = 0.359),<br>RFS(>1yr, mean = -9.335, SD = 0.831), p = 0.022<br><b>Cox.4</b> , exp(coef) = 0.548 p = 0.034 |
| 162  | HLA-DR <sup>+lo</sup> DAF-FM <sup>hi</sup>                                                                            | -         | 1 to 1250    | <b>Wilc.3</b> , Mean = -0.461, p = 0.007                                                                                                               |
| 175  | CD11b <sup>-lo</sup> HLA-DR <sup>+</sup> DAF-FM <sup>hi</sup>                                                         | -         | 3 to 1817    | <b>Wilc.3</b> , Mean = -0.404, p = 0.049                                                                                                               |

**Table S5. Myeloid cell phenotypes (nodes) associated with treatment effects from the MPATR analysis**

| Node | Phenotype                                                                                                                      | Cell Type | Cell Range | Test                                                                                                                                                                                                    |
|------|--------------------------------------------------------------------------------------------------------------------------------|-----------|------------|---------------------------------------------------------------------------------------------------------------------------------------------------------------------------------------------------------|
| 177  | CD11c <sup>-lo</sup> HLA-DR <sup>+</sup> DAF-FM <sup>-lo or +lo</sup>                                                          | -         | 26 to 2852 | <b>Cox.4</b> , exp(coef) = 0.540, p = 0.013                                                                                                                                                             |
| 179  | CD11b <sup>-lo or +lo</sup> CD11c <sup>-lo or +lo</sup> CD33 <sup>-lo</sup> HLA-DR <sup>-lo or +lo</sup> DAF-FM <sup>-lo</sup> | -         | 17 to 1863 | <b>Cox.1</b> , exp(coef) = 2.539, p = 0.036<br><b>Cox.4</b> , exp(coef) = 0.515, p = 0.045                                                                                                              |
| 186  | HLA-DR <sup>+</sup> DAF-FM <sup>+</sup>                                                                                        | -         | 46 to 1226 | <b>Wilc.3</b> , Mean = -0.291, p = 0.040                                                                                                                                                                |
| 189  | CD11b <sup>-lo or +lo</sup> CD11c <sup>+lo</sup> HLA-DR <sup>+</sup> DAF-FM <sup>+</sup> or +lo                                | -         | 3 to 2555  | <b>Cox.1</b> , exp(coef) = 2.779, p = 0.016<br><b>Cox.4</b> , exp(coef) = 0.256, p = 0.005                                                                                                              |
| 190  | CD11b <sup>+</sup> HLA-DR <sup>+</sup> DAF-FM <sup>-lo or +lo</sup>                                                            | -         | 5 to 455   | <b>Cox.2</b> , exp(coef) = 0.347, p = 0.028<br><b>Wilc.2</b> , RFS(<1yr, mean = -11.425, SD =0.612),<br>RFS(>1yr, mean = -10.904, SD = 0.638), p = 0.046<br><b>Cox.4</b> , exp(coef) = 0.527, p = 0.020 |
| 193  | HLA-DR <sup>+</sup> DAF-FM <sup>+</sup>                                                                                        | -         | 12 to 2591 | <b>Wilc.3</b> , Mean = -0.446, p = 0.018                                                                                                                                                                |
| 195  | CD11c <sup>+</sup> CD11b <sup>-lo</sup> HLA-DR <sup>+</sup> DAF-FM <sup>-lo</sup>                                              | -         | 3 to 1693  | <b>Cox.1</b> , exp(coef) = 1.821, p = 0.034<br><b>Cox.4</b> , exp(coef) = 0.489, p = 0.004                                                                                                              |
| 198  | CD11c <sup>+</sup> CD33 <sup>-lo</sup> HLA-DR <sup>+</sup> DAF-FM <sup>-lo</sup>                                               | -         | 0 to 380   | <b>Cox.4</b> , exp(coef) = 0.562, p = 0.033                                                                                                                                                             |
| 111  | CD11b <sup>+</sup> CD11c <sup>+lo</sup> CD33 <sup>-lo or +lo</sup> HLA-DR <sup>+</sup> or +lo DAF-FM <sup>-lo</sup>            | -         | 1 to 1145  | <b>Cox.4</b> , exp(coef) = 0.420, p = 0.023                                                                                                                                                             |
| 64   | CD11b <sup>+</sup> CD11c <sup>+</sup> CD33 <sup>-lo</sup> HLA-DR <sup>+</sup> DAF-FM <sup>-lo or +lo</sup>                     | -         | 0 to 2035  | <b>Cox.4</b> , exp(coef) = 0.439, p = 0.017                                                                                                                                                             |

**Table S6. Phenotypic characteristics myeloid immune cells (nodes) with the addition of scatter properties FSC and SSC associated with treatment effects from the MPATR output.**

| Table S6. Myeloid FSC/SSC cell phenotypes (nodes) associated with treatment effects from the MPATR analysis |                                                                                                                                       |                |             |                                                                                                                                                                                                                                                                                           |
|-------------------------------------------------------------------------------------------------------------|---------------------------------------------------------------------------------------------------------------------------------------|----------------|-------------|-------------------------------------------------------------------------------------------------------------------------------------------------------------------------------------------------------------------------------------------------------------------------------------------|
| Node                                                                                                        | Phenotype                                                                                                                             | Cell Type      | Cell Range  | Test                                                                                                                                                                                                                                                                                      |
| 3                                                                                                           | HLA-DR <sup>+</sup> CD33 <sup>hi</sup> CD11b <sup>+</sup> CD11c <sup>+</sup> CD14 <sup>hi</sup> DAF-FM <sup>+</sup>                   | Dendritic Cell | 1 to 1010   | <b>Wilc.1</b> , RFS(<1yr, mean = -10.328, SD = 0.823), RFS(>1yr, mean = -10.874, SD = 0.581), p = 0.038                                                                                                                                                                                   |
| 20                                                                                                          | HLA-DR <sup>+</sup> CD33 <sup>+</sup> CD11b <sup>+</sup> CD11c <sup>+</sup> CD14 <sup>-</sup> or <sup>-lo</sup> DAF-FM <sup>hi</sup>  | Dendritic Cell | 1 to 1844   | <b>Cox.4</b> , exp(coef) = 0.378, p = 0.018                                                                                                                                                                                                                                               |
| 38                                                                                                          | HLA-DR <sup>+</sup> CD33 <sup>+</sup> CD11b <sup>+</sup> CD11c <sup>+</sup> DAF-FM <sup>+</sup>                                       | Dendritic Cell | 0 to 441    | <b>Wilc.3</b> , Mean = 0.625, p = 0.001                                                                                                                                                                                                                                                   |
| 69                                                                                                          | HLA-DR <sup>+</sup> CD33 <sup>hi</sup> CD11b <sup>+</sup> CD11c <sup>+</sup> DAF-FM <sup>+</sup>                                      | Dendritic Cell | 9 to 1955   | <b>Cox.4</b> , exp(coef) = 0.429, p = 0.044                                                                                                                                                                                                                                               |
| 90                                                                                                          | HLA-DR <sup>+</sup> CD33 <sup>+</sup> CD11b <sup>lo</sup> or <sup>hi</sup> CD11c <sup>+</sup> DAF-FM <sup>+</sup>                     | Dendritic Cell | 0 to 295    | <b>Wilc.3</b> , Mean = 0.363, p = 0.021                                                                                                                                                                                                                                                   |
| 94                                                                                                          | HLA-DR <sup>+</sup> CD33 <sup>hi</sup> CD11b <sup>+</sup> CD11c <sup>+</sup> CD14 <sup>-</sup> or <sup>-lo</sup> DAF-FM <sup>hi</sup> | Dendritic Cell | 1 to 868    | <b>Cox.4</b> , exp(coef) = 0.501, p = 0.039                                                                                                                                                                                                                                               |
| 143                                                                                                         | HLA-DR <sup>+</sup> CD33 <sup>hi</sup> CD11b <sup>+</sup> CD11c <sup>+</sup> CD14 <sup>hi</sup> DAF-FM <sup>+</sup>                   | Dendritic Cell | 1 to 2103   | <b>Cox.4</b> , exp(coef) = 0.371, p = 0.028                                                                                                                                                                                                                                               |
| 168                                                                                                         | HLA-DR <sup>+</sup> CD33 <sup>+</sup> CD11b <sup>+</sup> CD11c <sup>+</sup> DAF-FM <sup>+</sup>                                       | Dendritic Cell | 0 to 596    | <b>Wilc.3</b> , Mean = 0.490, p = 0.029                                                                                                                                                                                                                                                   |
| 196                                                                                                         | HLA-DR <sup>lo</sup> or <sup>hi</sup> CD33 <sup>lo</sup> or <sup>hi</sup> CD11b <sup>+</sup> CD11c <sup>+</sup> DAF-FM <sup>+</sup>   | MDSC-like      | 4 to 746    | <b>Wilc.3</b> , Mean = 0.498, p = 0.004<br><b>Wilc.4</b> , RFS(<1yr, median = 0.369), RFS(>1yr, median = -0.785), p = 0.012                                                                                                                                                               |
| 14                                                                                                          | HLA-DR <sup>+</sup> CD33 <sup>+</sup> CD11b <sup>+</sup> CD11c <sup>+</sup> CD14 <sup>+</sup> DAF-FM <sup>hi</sup>                    | Monocytic      | 3 to 1575   | <b>Cox.4</b> , exp(coef) = 0.538, p = 0.035                                                                                                                                                                                                                                               |
| 16                                                                                                          | HLA-DR <sup>+</sup> CD33 <sup>+</sup> CD11b <sup>+</sup> CD11c <sup>+</sup> CD14 <sup>+</sup> DAF-FM <sup>lo</sup> or <sup>hi</sup>   | Monocytic      | 0 to 1796   | <b>Cox.4</b> , exp(coef) = 0.548, p = 0.017                                                                                                                                                                                                                                               |
| 17                                                                                                          | HLA-DR <sup>+</sup> CD33 <sup>+</sup> CD11b <sup>+</sup> CD11c <sup>+</sup> CD14 <sup>+</sup> DAF-FM <sup>hi</sup>                    | Monocytic      | 1 to 1338   | <b>Cox.1</b> , exp(coef) = 1.976, p = 0.025<br><b>Wilc.1</b> , RFS(<1yr, mean = -9.553, SD = 0.788), RFS(>1yr, mean = -10.354, SD = 0.757), p = 0.067<br><b>Cox.4</b> , exp(coef) = 0.329, p = 0.002<br><b>Wilc.4</b> , RFS(<1yr, median = -0.830), RFS(>1yr, median = -0.138), p = 0.005 |
| 43                                                                                                          | HLA-DR <sup>+</sup> CD33 <sup>+</sup> CD11b <sup>+</sup> CD11c <sup>+</sup> CD14 <sup>+</sup> DAF-FM <sup>+</sup>                     | Monocytic      | 2 to 3498   | <b>Wilc.1</b> , RFS(<1yr, mean = -8.155, SD = 0.850), RFS(>1yr, mean = -8.916, SD = 0.773), p = 0.026<br><b>Cox.4</b> , exp(coef) = 0.488, p = 0.019<br><b>Wilc.4</b> , RFS(<1yr, median = -0.755), RFS(>1yr, median = -0.131), p = 0.037                                                 |
| 44                                                                                                          | HLA-DR <sup>+</sup> CD33 <sup>+</sup> CD11b <sup>+</sup> CD11c <sup>+</sup> CD14 <sup>+</sup> DAF-FM <sup>+</sup>                     | Monocytic      | 3 to 2741   | <b>Wilc.3</b> , Mean = 0.684, p = 0.005                                                                                                                                                                                                                                                   |
| 65                                                                                                          | HLA-DR <sup>+</sup> CD33 <sup>+</sup> CD11b <sup>+</sup> CD11c <sup>+</sup> CD14 <sup>+</sup> CD15 <sup>hi</sup> DAF-FM <sup>+</sup>  | Monocytic      | 40 to 8258  | <b>Wilc.3</b> , Mean = 0.349, p = 0.027                                                                                                                                                                                                                                                   |
| 102                                                                                                         | HLA-DR <sup>+</sup> CD33 <sup>+</sup> CD11b <sup>+</sup> CD11c <sup>+</sup> CD14 <sup>+</sup> DAF-FM <sup>hi</sup>                    | Monocytic      | 0 to 3800   | <b>Cox.4</b> , exp(coef) = 0.462, p = 0.002<br><b>Wilc.4</b> , RFS(<1yr, median = -0.975), RFS(>1yr, median = -0.087), p = 0.013                                                                                                                                                          |
| 106                                                                                                         | HLA-DR <sup>+</sup> CD33 <sup>+</sup> CD11b <sup>+</sup> CD11c <sup>+</sup> CD14 <sup>+</sup> DAF-FM <sup>+</sup>                     | Monocytic      | 3 to 8020   | <b>Cox.4</b> , exp(coef) = 0.620, p = 0.040                                                                                                                                                                                                                                               |
| 111                                                                                                         | HLA-DR <sup>+</sup> CD33 <sup>+</sup> CD11b <sup>+</sup> CD11c <sup>+</sup> CD14 <sup>+</sup> CD15 <sup>lo</sup> DAF-FM <sup>+</sup>  | Monocytic      | 11 to 10220 | <b>Wilc.3</b> , Mean = 0.484, p = 0.013                                                                                                                                                                                                                                                   |
| 185                                                                                                         | HLA-DR <sup>+</sup> CD33 <sup>+</sup> CD11b <sup>+</sup> CD11c <sup>+</sup> CD14 <sup>+</sup> DAF-FM <sup>lo</sup> or <sup>hi</sup>   | Monocytic      | 0 to 1169   | <b>Wilc.3</b> , Mean = 0.522, p = 0.042                                                                                                                                                                                                                                                   |
| 189                                                                                                         | HLA-DR <sup>+</sup> CD33 <sup>+</sup> CD11b <sup>+</sup> CD11c <sup>+</sup> CD14 <sup>lo</sup> or <sup>hi</sup> DAF-FM <sup>+</sup>   | Monocytic      | 0 to 902    | <b>Wilc.3</b> , Mean = 0.441, p = 0.024                                                                                                                                                                                                                                                   |

**Table S6. Myeloid FSC/SSC cell phenotypes (nodes) associated with treatment effects from the MPATR analysis**

| Node | Phenotype                                                                                                                           | Cell Type | Cell Range   | Test                                                                                                                                                                                                                                                                                                                                  |
|------|-------------------------------------------------------------------------------------------------------------------------------------|-----------|--------------|---------------------------------------------------------------------------------------------------------------------------------------------------------------------------------------------------------------------------------------------------------------------------------------------------------------------------------------|
| 198  | HLA-DR <sup>+</sup> CD33 <sup>+</sup> CD11b <sup>+</sup> CD11c <sup>+</sup> CD14 <sup>+</sup> CD15 <sup>+</sup> DAF-FM <sup>+</sup> | Monocytic | 0 to 21415   | <i>Wilc.3</i> , Mean = 0.527, p = 0.037                                                                                                                                                                                                                                                                                               |
| 5    | DAF-FM <sup>+</sup>                                                                                                                 | -         | 326 to 14255 | <i>Cox.4</i> , exp(coef) = 2.090, p = 0.168                                                                                                                                                                                                                                                                                           |
| 7    | CD11b <sup>+</sup> CD11c <sup>+</sup> HLA-DR <sup>-/lo or +/lo</sup> DAF-FM <sup>+</sup>                                            | -         | 0 to 6811    | <i>Cox.4</i> , exp(coef) = 1.540, p = 0.042<br><i>Wilc.4</i> , RFS(<1yr, median = 0.982), RFS(>1yr, median = -0.531), p = 0.009                                                                                                                                                                                                       |
| 10   | CD11b <sup>+/lo</sup> CD11c <sup>-/lo</sup> HLA-DR <sup>+</sup> DAF-FM <sup>-/lo or +/lo</sup>                                      | -         | 3 to 5397    | <i>Cox.1</i> , exp(coef) = 1.900, p = 0.046<br><i>Cox.4</i> , exp(coef) = 0.577, p = 0.041                                                                                                                                                                                                                                            |
| 15   | CD11b <sup>- or -/lo</sup> HLA-DR <sup>+</sup> DAF-FM <sup>-/lo or +/lo</sup>                                                       | -         | 28 to 2345   | <i>Cox.4</i> , exp(coef) = 0.621, p = 0.038                                                                                                                                                                                                                                                                                           |
| 21   | HLA-DR <sup>+</sup> DAF-FM <sup>+</sup>                                                                                             | -         | 56 to 3732   | <i>Wilc.3</i> , Mean = -0.469, p = 0.018                                                                                                                                                                                                                                                                                              |
| 22   | CD11b <sup>+</sup> CD11c <sup>+</sup> HLA-DR <sup>- or -/lo</sup> DAF-FM <sup>-/lo or +/lo</sup>                                    | -         | 4 to 2809    | <i>Wilc.3</i> , Mean = 0.287, p = 0.018                                                                                                                                                                                                                                                                                               |
| 27   | HLA-DR <sup>+</sup> DAF <sup>-/lo</sup>                                                                                             | -         | 77 to 4138   | <i>Wilc.3</i> , Mean = -0.455, p = 0.031                                                                                                                                                                                                                                                                                              |
| 28   | HLA-DR <sup>- or -/lo</sup> DAF-FM <sup>-/lo</sup>                                                                                  | -         | 134 to 11719 | <i>Cox.1</i> , exp(coef) = 2.177, p = 0.014                                                                                                                                                                                                                                                                                           |
| 29   | HLA-DR <sup>-/lo</sup> DAF-FM <sup>+</sup>                                                                                          | -         | 53 to 20362  | <i>Cox.4</i> , exp(coef) = 2.183, p = 0.013                                                                                                                                                                                                                                                                                           |
| 30   | CD11b <sup>-/lo or +/lo</sup> HLA-DR <sup>+/lo</sup> DAF-FM <sup>+</sup>                                                            | -         | 87 to 2932   | <i>Wilc.3</i> , Mean = -0.395, p = 0.001                                                                                                                                                                                                                                                                                              |
| 32   | HLA-DR <sup>+</sup> DAF-FM <sup>-/lo</sup>                                                                                          | -         | 67 to 2112   | <i>Cox.4</i> , exp(coef) = 0.566, p = 0.028                                                                                                                                                                                                                                                                                           |
| 37   | CD11b <sup>+</sup> CD11c <sup>+</sup> HLA-DR <sup>-/lo</sup> DAF-FM <sup>+</sup>                                                    | -         | 0 to 5884    | <i>Cox.4</i> , exp(coef) = 1.602, p = 0.029                                                                                                                                                                                                                                                                                           |
| 46   | CD11b <sup>+</sup> CD11c <sup>+</sup> HLA-DR <sup>-/lo</sup> DAF-FM <sup>+</sup>                                                    | -         | 0 to 2048    | <i>Cox.2</i> , exp(coef) = 2.457, p = 0.017<br><i>Wilc.2</i> , RFS(<1yr, mean = -11.104, SD = 0.723), RFS(>1yr, mean = -12.118, SD = 1.021), p = 0.012<br><i>Wilc.3</i> , Mean = 0.401, p = 0.0495<br><i>Cox.4</i> , exp(coef) = 1.924, p = 0.002<br><i>Wilc.4</i> , RFS(<1yr, median = 0.792), RFS(>1yr, median = -0.674), p = 0.019 |
| 52   | HLA-DR <sup>+</sup> DAF-FM <sup>+</sup>                                                                                             | -         | 58 to 3485   | <i>Wilc.3</i> , Mean = -0.511, p = 0.010                                                                                                                                                                                                                                                                                              |
| 62   | CD11b <sup>-/lo</sup> HLA-DR <sup>+</sup> DAF-FM <sup>+/lo</sup>                                                                    | -         | 59 to 995    | <i>Cox.1</i> , exp(coef) = 2.660, p = 0.020<br><i>Wilc.3</i> , Mean = -0.348, p = 0.008<br><i>Cox.4</i> , exp(coef) = 0.438, p = 0.004                                                                                                                                                                                                |
| 68   | CD11b <sup>+</sup> CD11c <sup>+</sup> HLA-DR <sup>-/lo or +/lo</sup> DAF-FM <sup>+</sup>                                            | -         | 44 to 7154   | <i>Wilc.3</i> , Mean = 0.330, p = 0.011                                                                                                                                                                                                                                                                                               |
| 78   | CD11b <sup>+/lo</sup> CD11c <sup>-/lo</sup> HLA-DR <sup>+</sup> DAF-FM <sup>+/lo</sup>                                              | -         | 4 to 1691    | <i>Cox.2</i> , exp(coef) = 0.264, p = 0.019                                                                                                                                                                                                                                                                                           |
| 82   | CD11b <sup>-/lo or +/lo</sup> CD11c <sup>-/lo</sup> HLA-DR <sup>+</sup> DAF-FM <sup>+</sup>                                         | -         | 1 to 2770    | <i>Wilc.1</i> , RFS(<1yr, mean = -10.691, SD = 0.939), RFS(>1yr, mean = -10.251, SD = 0.724), p = 0.047<br><i>Wilc.3</i> , Mean = -0.421, p = 0.037                                                                                                                                                                                   |
| 84   | CD11b <sup>-/lo</sup> CD11c <sup>-/lo or +/lo</sup> HLA-DR <sup>+</sup> DAF-FM <sup>+/lo</sup>                                      | -         | 40 to 5758   | <i>Cox.4</i> , exp(coef) = 0.551, p = 0.017                                                                                                                                                                                                                                                                                           |

**Table S6. Myeloid FSC/SSC cell phenotypes (nodes) associated with treatment effects from the MPATR analysis**

| Node | Phenotype                                                                                                                          | Cell Type | Cell Range   | Test                                                                                                                                                                                                                                                                                    |
|------|------------------------------------------------------------------------------------------------------------------------------------|-----------|--------------|-----------------------------------------------------------------------------------------------------------------------------------------------------------------------------------------------------------------------------------------------------------------------------------------|
| 89   | CD11b <sup>+</sup> CD11c <sup>lo</sup> HLA-DR <sup>+</sup> DAF-FM <sup>+</sup>                                                     | -         | 39 to 10134  | <b>Wilc.3</b> , Mean = -0.440, p = 0.0475                                                                                                                                                                                                                                               |
| 91   | CD11b <sup>lo</sup> CD11c <sup>lo</sup> HLA-DR <sup>lo</sup> DAF-FM <sup>+</sup>                                                   | -         | 76 to 3274   | <b>Wilc.3</b> , Mean = -0.206, p = 0.045                                                                                                                                                                                                                                                |
| 98   | CD11b <sup>+/lo</sup> CD11c <sup>+</sup> CD33 <sup>- or -/lo</sup> HLA-DR <sup>+</sup> DAF-FM <sup>lo or +/lo</sup>                | -         | 8 to 1986    | <b>Cox.4</b> , exp(coef) = 0.588, p = 0.026                                                                                                                                                                                                                                             |
| 101  | CD11b <sup>- or -/lo</sup> CD11c <sup>-/lo or +/lo</sup> HLA-DR <sup>+</sup> DAF-FM <sup>lo or +/lo</sup>                          | -         | 1 to 738     | <b>Cox.4</b> , exp(coef) = 0.628, p = 0.036                                                                                                                                                                                                                                             |
| 105  | HLA-DR <sup>lo</sup> DAF-FM <sup>lo</sup>                                                                                          | -         | 235 to 15831 | <b>Cox.1</b> , exp(coef) = 2.356, p = 0.029                                                                                                                                                                                                                                             |
| 107  | CD11b <sup>+</sup> CD11c <sup>+</sup> HLA-DR <sup>lo</sup> DAF-FM <sup>+</sup> hi                                                  | -         | 5 to 4212    | <b>Cox.2</b> , exp(coef) = 2.429, p = 0.031<br><b>Cox.4</b> , exp(coef) = 1.555, p = 0.022                                                                                                                                                                                              |
| 108  | HLA-DR <sup>+/lo</sup> DAF-FM <sup>+</sup>                                                                                         | -         | 79 to 3660   | <b>Wilc.3</b> , Mean = -0.384, p = 0.005                                                                                                                                                                                                                                                |
| 113  | DAF-FM <sup>lo</sup>                                                                                                               | -         | 17 to 4241   | <b>Cox.1</b> , exp(coef) = 1.679, p = 0.049                                                                                                                                                                                                                                             |
| 120  | CD11c <sup>lo or +/lo</sup> HLA-DR <sup>+/lo</sup> DAF-FM <sup>lo</sup>                                                            | -         | 47 to 3332   | <b>Cox.1</b> , exp(coef) = 2.325, p = 0.029<br><b>Wilc.3</b> , Mean = -0.330, p = 0.033<br><b>Cox.4</b> , exp(coef) = 0.569, p = 0.038                                                                                                                                                  |
| 128  | CD11c <sup>lo or +/lo</sup> HLA-DR <sup>-/lo or +/lo</sup> DAF-FM <sup>lo</sup>                                                    | -         | 91 to 6339   | <b>Cox.1</b> , exp(coef) = 2.037, p = 0.023                                                                                                                                                                                                                                             |
| 133  | CD11b <sup>+</sup> CD11c <sup>+</sup> CD33 <sup>lo</sup> HLA-DR <sup>+</sup> DAF-FM <sup>+</sup>                                   | -         | 1 to 1021    | <b>Wilc.3</b> , Mean = 0.288, p = 0.037                                                                                                                                                                                                                                                 |
| 140  | CD11b <sup>+</sup> CD11c <sup>+</sup> CD33 <sup>- or -/lo</sup> HLA-DR <sup>+</sup> DAF-FM <sup>lo</sup>                           | -         | 1 to 2787    | <b>Cox.2</b> , exp(coef) = 0.277, p = 0.011<br><b>Wilc.2</b> , RFS(<1yr, mean = -9.948, SD = 0.484), RFS(>1yr, mean = -9.195, SD = 0.738), p = 0.009<br><b>Cox.4</b> , exp(coef) = 0.453, p = 0.009<br><b>Wilc.4</b> , RFS(<1yr, median = -0.883), RFS(>1yr, median = 0.082), p = 0.015 |
| 147  | DAF-FM <sup>lo</sup>                                                                                                               | -         | 82 to 5684   | <b>Cox.1</b> , exp(coef) = 2.361, p = 0.015                                                                                                                                                                                                                                             |
| 151  | CD11c <sup>+</sup> CD33 <sup>lo</sup> HLA-DR <sup>+</sup> DAF-FM <sup>+</sup>                                                      | -         | 0 to 797     | <b>Cox.4</b> , exp(coef) = 0.466, p = 0.022                                                                                                                                                                                                                                             |
| 155  | CD11b <sup>lo</sup> CD11c <sup>lo</sup> HLA-DR <sup>lo</sup> DAF-FM <sup>+</sup>                                                   | -         | 129 to 12829 | <b>Cox.4</b> , exp(coef) = 2.264, p = 0.020                                                                                                                                                                                                                                             |
| 165  | HLA-DR <sup>+</sup> DAF-FM <sup>lo</sup>                                                                                           | -         | 27 to 2745   | <b>Wilc.3</b> , Mean = -0.458, p = 0.014                                                                                                                                                                                                                                                |
| 174  | CD11b <sup>+</sup> CD11c <sup>+</sup> DAF-FM <sup>+</sup>                                                                          | -         | 20 to 3000   | <b>Cox.4</b> , exp(coef) = 1.508, p = 0.025<br><b>Wilc.4</b> , RFS(<1yr, median = 0.462), RFS(>1yr, median = -0.525), p = 0.046                                                                                                                                                         |
| 23   | CD11b <sup>lo</sup> CD11c <sup>+/lo</sup> CD33 <sup>lo</sup> HLA-DR <sup>+</sup> DAF-FM <sup>+</sup>                               | -         | 24 to 2083   | <b>Cox.4</b> , exp(coef) = 0.400, p = 0.035                                                                                                                                                                                                                                             |
| 26   | CD11b <sup>+</sup> CD11c <sup>+</sup> CD33 <sup>+/lo</sup> CD14 <sup>lo</sup> HLA-DR <sup>+</sup> DAF-FM <sup>lo</sup>             | -         | 3 to 1438    | <b>Cox.4</b> , exp(coef) = 0.468, p = 0.019                                                                                                                                                                                                                                             |
| 48   | CD11b <sup>+/lo</sup> CD11c <sup>+</sup> CD33 <sup>+/lo</sup> CD14 <sup>- or -/lo</sup> HLA-DR <sup>+</sup> DAF-FM <sup>+/lo</sup> | -         | 9 to 1884    | <b>Cox.4</b> , exp(coef) = 0.538, p = 0.043<br><b>Wilc.4</b> , RFS(<1yr, median = -1.245), RFS(>1yr, median = -0.072), p = 0.008                                                                                                                                                        |

**Table S6. Myeloid FSC/SSC cell phenotypes (nodes) associated with treatment effects from the MPATR analysis**

| Node | Phenotype                                                                                                                                | Cell Type | Cell Range | Test                                                                                       |
|------|------------------------------------------------------------------------------------------------------------------------------------------|-----------|------------|--------------------------------------------------------------------------------------------|
| 57   | CD11b <sup>+</sup> CD11c <sup>-/lo</sup> CD33 <sup>or -/lo</sup> CD14 <sup>- or -/lo</sup> HLA-DR <sup>+</sup> DAF-FM <sup>or -/lo</sup> | -         | 4 to 3834  | <b>Cox.2</b> , exp(coef) = 0.478, p = 0.045<br><b>Cox.4</b> , exp(coef) = 0.543, p = 0.013 |
| 71   | CD11b <sup>+</sup> CD11c <sup>+</sup> CD33 <sup>-/lo or +/lo</sup> HLA-DR <sup>+</sup> CD14 <sup>-/lo</sup> DAF-FM <sup>-/lo</sup>       | -         | 0 to 2002  | <b>Cox.1</b> , exp(coef) = 1.936, p = 0.034<br><b>Cox.4</b> , exp(coef) = 0.553, p = 0.019 |

Table S7a. Representing nodes of PCA analysis of lymphoid population prior to treatment:

| Node | Phenotype                                                                                                                                                | Cell Type                  | $\lambda$ , (PC1) | % in Component | Statistics                                                                                                                                                                                                                                                                                                                           |
|------|----------------------------------------------------------------------------------------------------------------------------------------------------------|----------------------------|-------------------|----------------|--------------------------------------------------------------------------------------------------------------------------------------------------------------------------------------------------------------------------------------------------------------------------------------------------------------------------------------|
| 64   | CD3 <sup>+</sup> CD8 <sup>-/lo</sup> CD56 <sup>- or -/lo</sup> CD127 <sup>+</sup> CD11c <sup>- or -/lo</sup> CD25 <sup>-/lo</sup> DAF-FM <sup>+/lo</sup> | Early Effector T cell      | -0.12857          | 1.65302449     | NS                                                                                                                                                                                                                                                                                                                                   |
| 13   | CD11c <sup>+</sup> CD25 <sup>-/lo</sup> DAF-FM <sup>+/lo</sup>                                                                                           | Antigen presentation cell  | -0.121073         | 1.465867133    | <b>Cox.4</b> , exp(coef) = 0.510, p = 0.025, p.adjust = 0.503                                                                                                                                                                                                                                                                        |
| 84   | CD3 <sup>+</sup> CD8 <sup>+</sup> CD127 <sup>+</sup> DAF-FM <sup>-/lo</sup>                                                                              | CD8 Naive memory T cell    | -0.120714         | 1.45718698     | <b>Wilc.1</b> , RFS(<1yr, mean = -8.208, SD = 0.227), RFS(>1yr, mean = -8.537, SD = 0.486), p = 0.038, p.adjust = 1.000, qvalue = 1.000;<br><b>Wilc.2</b> , RFS(<1yr, mean = -8.023, SD = 0.544), RFS(>1yr, mean = -8.414, SD = 0.528), p = 0.037, qvalue = 0.832;                                                                   |
| 167  | CD11c <sup>+</sup> CD25 <sup>-/lo or +/lo</sup> DAF-FM <sup>+/lo</sup>                                                                                   | Antigen presentation cell  | -0.117463         | 1.379755637    | <b>Cox.4</b> , exp(coef) = 0.397, p = 0.040, p.adjust = 0.522                                                                                                                                                                                                                                                                        |
| 192  | CD11c <sup>+</sup> CD25 <sup>+/lo</sup> DAF-FM <sup>+/lo</sup>                                                                                           | Antigen presentation cell  | -0.116881         | 1.366116816    | NS                                                                                                                                                                                                                                                                                                                                   |
| 80   | CD8 <sup>+/lo</sup> CD56 <sup>+</sup> CD11c <sup>+/lo</sup> CD25 <sup>-/lo</sup> DAF-FM <sup>+/lo or -/lo</sup>                                          | NK Cell                    | -0.116032         | 1.346342502    | NS                                                                                                                                                                                                                                                                                                                                   |
| 37   | CD11c <sup>+/lo or -/lo</sup> CD56 <sup>-/lo</sup> CD25 <sup>-/lo</sup> DAF-FM <sup>+/lo</sup>                                                           | Antigen presentation cell  | -0.116005         | 1.345716003    | NS                                                                                                                                                                                                                                                                                                                                   |
| 86   | CD19 <sup>+</sup> CD25 <sup>-/lo</sup> DAF-FM <sup>-/lo or +/lo</sup>                                                                                    | B cell                     | -0.115658         | 1.337677296    | <b>Cox.1</b> , exp(coef) = 1.777, p = 0.034, p.adjust = 0.949;<br><b>Cox.4</b> , exp(coef) = 0.668, p = 0.030, p.adjust = 0.503;                                                                                                                                                                                                     |
| 134  | CD8 <sup>-/lo</sup> CD56 <sup>+/lo</sup> CD11c <sup>-/lo</sup> CD25 <sup>-/lo</sup> DAF-FM <sup>-/lo</sup>                                               | NK Cell                    | -0.115638         | 1.337214704    | NS                                                                                                                                                                                                                                                                                                                                   |
| 23   | CD3 <sup>+</sup> CD4 <sup>+</sup> CD127 <sup>+</sup> CD25 <sup>-/lo</sup> DAF-FM <sup>+/lo</sup>                                                         | Effector memory T cell     | -0.113195         | 1.281310803    | NS                                                                                                                                                                                                                                                                                                                                   |
| 106  | CD3 <sup>+</sup> CD8 <sup>-/lo</sup> CD127 <sup>+</sup> CD11c <sup>-/lo</sup> CD25 <sup>-/lo</sup> DAF-FM <sup>+/lo</sup>                                | Early Effector T cell      | -0.113148         | 1.28024699     | NS                                                                                                                                                                                                                                                                                                                                   |
| 115  | CD19 <sup>+</sup> CD11c <sup>-/lo</sup> CD25 <sup>-/lo</sup> DAF-FM <sup>-/lo</sup>                                                                      | B cell                     | -0.111091         | 1.234121028    | <b>Cox.4</b> , exp(coef) = 0.677, p = 0.047, p.adjust = 0.522                                                                                                                                                                                                                                                                        |
| 69   | CD3 <sup>+</sup> CD8 <sup>+</sup> CD127 <sup>-/lo</sup> DAF-FM <sup>+</sup>                                                                              | Effector T Cell            | 0.110768          | 1.226954982    | <b>Wilc.3</b> , Mean = -0.370, p = 0.012, p.adjust = 0.225                                                                                                                                                                                                                                                                           |
| 3    | CD19 <sup>+</sup> CD25 <sup>-/lo</sup> DAF-FM <sup>-/lo</sup>                                                                                            | B cell                     | -0.107885         | 1.163917323    | <b>Cox.1</b> , exp(coef) = 1.64, p = 0.049, p.adjust = 0.949;<br><b>Cox.4</b> , exp(coef) = 0.666, p = 0.046, p.adjust = 0.522                                                                                                                                                                                                       |
| 96   | CD11c <sup>+</sup> CD56 <sup>+</sup> DAF-FM <sup>-/lo</sup>                                                                                              | NK cell                    | -0.107822         | 1.162558368    | NS                                                                                                                                                                                                                                                                                                                                   |
| 63   | CD11c <sup>+</sup> CD56 <sup>+</sup> CD25 <sup>-/lo</sup> DAF-FM <sup>-/lo</sup>                                                                         | NK cell                    | -0.104649         | 1.09514132     | NS                                                                                                                                                                                                                                                                                                                                   |
| 68   | CD11c <sup>+</sup> CD8 <sup>+/lo or -/lo</sup> CD4 <sup>-/lo</sup> CD25 <sup>+/lo</sup> DAF-FM <sup>+</sup>                                              | Early T cell               | 0.104117          | 1.084034969    | NS                                                                                                                                                                                                                                                                                                                                   |
| 109  | CD11c <sup>+</sup> CD8 <sup>+/lo</sup> CD56 <sup>+</sup> CD25 <sup>-/lo</sup> DAF-FM <sup>-/lo</sup>                                                     | NK Cell                    | -0.104015         | 1.081912023    | NS                                                                                                                                                                                                                                                                                                                                   |
| 32   | CD11c <sup>+</sup> CD4 <sup>-/lo</sup> CD25 <sup>+/lo</sup> DAF-FM <sup>+</sup>                                                                          | Antigen presentation cell  | -0.103938         | 1.080310784    | NS                                                                                                                                                                                                                                                                                                                                   |
| 28   | CD3 <sup>+</sup> CD127 <sup>- or -/lo</sup> DAF-FM <sup>-/lo</sup>                                                                                       | $\alpha\beta$ T cell       | -0.103613         | 1.073565377    | NS                                                                                                                                                                                                                                                                                                                                   |
| 56   | CD3 <sup>+</sup> CD8 <sup>+</sup> CD127 <sup>+</sup> CD25 <sup>-/lo</sup> DAF-FM <sup>+</sup>                                                            | Effector T cell            | 0.103241          | 1.065870408    | NS                                                                                                                                                                                                                                                                                                                                   |
| 141  | CD3 <sup>+</sup> CD8 <sup>+/lo</sup> CD56 <sup>+/lo</sup> CD127 <sup>+</sup> CD11c <sup>-/lo</sup> CD25 <sup>-/lo</sup> DAF-FM <sup>-/lo</sup>           | NK cell                    | -0.102978         | 1.060446848    | NS                                                                                                                                                                                                                                                                                                                                   |
| 26   | CD3 <sup>+</sup> CD8 <sup>+</sup> CD127 <sup>+</sup> DAF-FM <sup>-/lo</sup>                                                                              | Naive CD8 or memory T cell | -0.102875         | 1.058326563    | <b>Cox.1</b> , exp(coef) = 3.635, p = 0.031, p.adjust = 0.949;<br><b>Wilc.1</b> , RFS(<1yr, mean = -7.843, SD = 0.402), RFS(>1yr, mean = -8.227, SD = 0.506), p = 0.038, p.adjust = 1.000, qvalue = 1.000;<br><b>Wilc.2</b> , RFS(<1yr, mean = -7.750, SD = 0.611), RFS(>1yr, mean = -8.216, SD = 0.549), p = 0.022, qvalue = 0.832; |
| 50   | CD3 <sup>+</sup> DAF-FM <sup>-/lo</sup>                                                                                                                  | $\alpha\beta$ T cell       | -0.102758         | 1.055920656    | NS                                                                                                                                                                                                                                                                                                                                   |
| 197  | CD11c <sup>+</sup> CD56 <sup>- or -/lo</sup> CD4 <sup>-/lo</sup> CD25 <sup>+/lo</sup> DAF-FM <sup>+/lo</sup>                                             | Antigen presentation cell  | -0.102358         | 1.047716016    | <b>Wilc.3</b> , Mean = 0.357, p = 0.012, p.adjust = 0.225;<br><b>Cox.4</b> , exp(coef) = 0.368, p = 0.018, p.adjust = 0.503                                                                                                                                                                                                          |
| 114  | CD11c <sup>+</sup> CD25 <sup>+/lo</sup> DAF-FM <sup>+/low</sup>                                                                                          | Antigen presentation cell  | -0.102015         | 1.040706023    | NS                                                                                                                                                                                                                                                                                                                                   |
| 19   | CD3 <sup>+</sup> CD8 <sup>+</sup> CD127 <sup>-/lo</sup> CD11c <sup>-/lo</sup> DAF-FM <sup>+</sup>                                                        | Effector memory CD8 T cell | 0.101956          | 1.039502594    | NS                                                                                                                                                                                                                                                                                                                                   |
| 180  | CD3 <sup>+</sup> CD127 <sup>+/lo</sup> DAF-FM <sup>+/lo</sup>                                                                                            | $\alpha\beta$ T Cell       | -0.101863         | 1.037607077    | <b>Wilc.2</b> , RFS(<1yr, mean = -10.618, SD = 0.387), RFS(>1yr, mean = -11.174, SD = 0.734), p = 0.010, qvalue = 0.832;                                                                                                                                                                                                             |
| 40   | CD11c <sup>+</sup> CD25 <sup>-/lo</sup> DAF-FM <sup>+/lo</sup>                                                                                           | Antigen presentation cell  | -0.101681         | 1.033902576    | NS                                                                                                                                                                                                                                                                                                                                   |
| 72   | CD3 <sup>+</sup> CD4 <sup>+</sup> CD127 <sup>+</sup> CD25 <sup>-/lo</sup> DAF-FM <sup>-/lo</sup>                                                         | Effector memory T cell     | -0.101509         | 1.030407708    | NS                                                                                                                                                                                                                                                                                                                                   |
| 10   | CD11c <sup>+</sup> CD19 <sup>+</sup> CD25 <sup>+/lo</sup> DAF-FM <sup>+/lo</sup>                                                                         | B cell                     | -0.101437         | 1.028946497    | NS                                                                                                                                                                                                                                                                                                                                   |
| 155  | CD3 <sup>+</sup> CD8 <sup>+</sup> CD25 <sup>-/lo</sup> DAF-FM <sup>+</sup>                                                                               | Effector T Cell            | 0.100911          | 1.018302992    | <b>Wilc.1</b> , RFS(<1yr, mean = -8.666, SD = 0.694), RFS(>1yr, mean = -8.066, SD = 0.956), p = 0.035, p.adjust = 1.000, qvalue = 1.000                                                                                                                                                                                              |
| 65   | CD11c <sup>-/lo</sup> CD56 <sup>+</sup> DAF-FM <sup>-/lo</sup>                                                                                           | NK cell                    | -0.100804         | 1.016144642    | NS                                                                                                                                                                                                                                                                                                                                   |
| 194  | CD11c <sup>+/lo</sup> CD25 <sup>-/lo</sup> DAF-FM <sup>lo</sup>                                                                                          | Antigen presentation cell  | -0.100227         | 1.004545153    | NS                                                                                                                                                                                                                                                                                                                                   |

Table S7b. Representing nodes of PCA analysis of lymphoid population (post-pre):

| Node | Phenotype                                                                                            | Cell Type                  | $\lambda$ , (PC1) | % in Component | Statistics                                                                                                                                                                              |
|------|------------------------------------------------------------------------------------------------------|----------------------------|-------------------|----------------|-----------------------------------------------------------------------------------------------------------------------------------------------------------------------------------------|
| 126  | CD8 <sup>+</sup> CD56 <sup>+</sup> CD11c <sup>+</sup> DAF-FM <sup>+</sup>                            | CD8 <sup>+</sup> NK cell   | 0.112988          | 1.276628814    | <b>Wilc.3</b> , Mean = 0.382, p = 0.012, p.adjust = 0.225;<br><b>Cox.4</b> , exp(coef) = 1.484, p = 0.040, p.adjust = 0.522                                                             |
| 24   | CD11c <sup>+/lo</sup> CD56 <sup>+</sup> DAF-FM <sup>+</sup>                                          | NK cell                    | 0.112028          | 1.255027278    | <b>Cox.4</b> , exp(coef) = 1.610, p = 0.019, p.adjust = 0.503<br><b>Wilc.4</b> , RFS(<1yr, median = 0.438), RFS(>1yr, median = -0.506), p = 0.017, p.adjust = 0.686, qvalue = 0.686     |
| 122  | CD8 <sup>+</sup> CD56 <sup>+</sup> CD11c <sup>+</sup> CD25 <sup>-/lo</sup> DAF-FM <sup>+</sup>       | CD8 <sup>+</sup> NK cell   | 0.111521          | 1.243693344    | <b>Wilc.3</b> , Mean = 0.343, p = 0.011, p.adjust = 0.225<br><b>Wilc.4</b> , RFS(<1yr, median = 0.271), RFS(>1yr, median = -0.575), p = 0.037, p.adjust = 0.686, qvalue = 0.686         |
| 127  | CD11c <sup>+/lo</sup> CD56 <sup>+</sup> CD8 <sup>-/lo</sup> CD25 <sup>-/lo</sup> DAF-FM <sup>+</sup> | NK cell                    | 0.110914          | 1.23019154     | NS                                                                                                                                                                                      |
| 102  | CD8 <sup>+/lo</sup> CD11c <sup>+</sup> CD56 <sup>+</sup> CD25 <sup>-/lo</sup> DAF-FM <sup>+</sup>    | NK cell                    | 0.109008          | 1.188274406    | NS                                                                                                                                                                                      |
| 42   | CD11c <sup>+</sup> CD56 <sup>+/lo</sup> CD25 <sup>-/lo</sup> DAF-FM <sup>+</sup>                     | NK cell                    | 0.108139          | 1.169404332    | <b>Cox.4</b> , exp(coef) = 1.659, p = 0.018, p.adjust = 0.503<br><b>Wilc.4</b> , RFS(<1yr, median = 0.670), RFS(>1yr, median = -0.444), p = 0.005, p.adjust = 0.686, qvalue = 0.686     |
| 130  | CD11c <sup>+</sup> CD8 <sup>-/lo</sup> CD56 <sup>+</sup> CD25 <sup>-/lo</sup> DAF-FM <sup>+</sup>    | NK cell                    | 0.1057            | 1.117249       | NS                                                                                                                                                                                      |
| 136  | CD11c <sup>+</sup> CD8 <sup>-/lo</sup> CD56 <sup>+</sup> CD25 <sup>-/lo</sup> DAF-FM <sup>+</sup>    | NK cell                    | 0.105565          | 1.114396923    | NS                                                                                                                                                                                      |
| 132  | CD8 <sup>+/lo</sup> CD11c <sup>+</sup> CD56 <sup>+</sup> CD25 <sup>-/lo</sup> DAF-FM <sup>+</sup>    | CD8 <sup>+</sup> NK cell   | 0.104518          | 1.092401232    | <b>Wilc.3</b> , Mean = 0.347, p = 0.012, p.adjust = 0.225                                                                                                                               |
| 157  | CD11c <sup>-/lo</sup> CD8 <sup>-/lo</sup> CD56 <sup>+</sup> CD25 <sup>-/lo</sup> DAF-FM <sup>+</sup> | NK cell                    | 0.104422          | 1.090395408    | NS                                                                                                                                                                                      |
| 17   | CD11c <sup>+</sup> CD8 <sup>-/lo</sup> CD56 <sup>+</sup> CD25 <sup>-/lo</sup> DAF-FM <sup>+</sup>    | NK cell                    | 0.103156          | 1.064116034    | NS                                                                                                                                                                                      |
| 176  | CD3 <sup>+</sup> CD8 <sup>+</sup> CD127 <sup>+</sup> CD25 <sup>-/lo</sup> DAF-FM <sup>+</sup>        | Effector CD8 T cell        | 0.103095          | 1.062857903    | NS                                                                                                                                                                                      |
| 51   | CD8 <sup>+</sup> CD56 <sup>+</sup> CD11c <sup>+/lo</sup> CD25 <sup>-/lo</sup> DAF-FM <sup>+</sup>    | NK cell                    | 0.102657          | 1.053845965    | NS                                                                                                                                                                                      |
| 27   | CD8 <sup>+/lo</sup> CD11c <sup>+</sup> CD56 <sup>+</sup> DAF-FM <sup>+</sup>                         | CD8 <sup>+</sup> NK cell   | 0.101684          | 1.033963586    | <b>Wilc.3</b> , Mean = 0.319, p = 0.014, p.adjust = 0.228                                                                                                                               |
| 53   | CD3 <sup>+</sup> CD8 <sup>+</sup> CD127 <sup>+/lo</sup> DAF-FM <sup>+</sup>                          | CD8 Naive or Memory T Cell | 0.100388          | 1.007775054    | <b>Cox.2</b> , exp(coef) = 2.787, p = 0.047, p.adjust = 0.989;<br><b>Wilc.2</b> , RFS(<1yr, mean = -6.628, SD = 0.614), RFS(>1yr, mean = -7.191, SD = 0.642), p = 0.030, qvalue = 0.832 |



Table S7c. Representing nodes of PCA analysis of myeloid population prior to treatment:

| Node | Phenotype                                                                                                          | Cell Type                                    | $\lambda$ , (PC1) | % in Component | Statistics                                                                                                                                                                                                                                                                                                                                                                                          |
|------|--------------------------------------------------------------------------------------------------------------------|----------------------------------------------|-------------------|----------------|-----------------------------------------------------------------------------------------------------------------------------------------------------------------------------------------------------------------------------------------------------------------------------------------------------------------------------------------------------------------------------------------------------|
| 44   | CD11c <sup>+</sup> CD11b <sup>+</sup> CD33 <sup>+</sup> HLA-DR <sup>+</sup> DAF-FM <sup>lo</sup>                   | Dendritic Cell                               | 0.121667          | 1.480285889    | NS                                                                                                                                                                                                                                                                                                                                                                                                  |
| 61   | CD11c <sup>+</sup> HLA-DR <sup>+</sup> DAF-FM <sup>lo</sup>                                                        | -                                            | 0.119103          | 1.418552461    | <b>Wilc.3</b> , Mean = -0.442, p = 0.004, p.adjust = 0.213                                                                                                                                                                                                                                                                                                                                          |
| 23   | CD11b <sup>+</sup> CD11c <sup>+</sup> CD33 <sup>+</sup> HLA-DR <sup>+</sup> DAF-FM <sup>lo</sup>                   | -                                            | 0.115254          | 1.328348452    | NS                                                                                                                                                                                                                                                                                                                                                                                                  |
| 178  | CD33 <sup>+</sup> CD11b <sup>+</sup> CD11c <sup>+</sup> CD14 <sup>+</sup> HLA-DR <sup>+</sup> DAF-FM <sup>lo</sup> | Dendritic Cell                               | 0.114943          | 1.321189325    | <b>Cox.4</b> , exp(coef) = 0.360 p = 0.016, p.adjust = 0.216                                                                                                                                                                                                                                                                                                                                        |
| 183  | CD11b <sup>+</sup> CD11c <sup>+</sup> CD15 <sup>+</sup> CD33 <sup>+</sup> HLA-DR <sup>+</sup> DAF-FM <sup>lo</sup> | Dendritic Cell                               | 0.114827          | 1.318523993    | NS                                                                                                                                                                                                                                                                                                                                                                                                  |
| 98   | HLA-DR <sup>+</sup> DAF-FM <sup>lo</sup>                                                                           | -                                            | 0.114525          | 1.311597563    | NS                                                                                                                                                                                                                                                                                                                                                                                                  |
| 199  | CD11b <sup>+</sup> CD11c <sup>+</sup> CD33 <sup>+</sup> CD14 <sup>+</sup> HLA-DR <sup>+</sup> DAF-FM <sup>lo</sup> | Monocyte derived dendritic cell              | 0.114277          | 1.305923273    | NS                                                                                                                                                                                                                                                                                                                                                                                                  |
| 111  | CD11b <sup>+</sup> CD11c <sup>+</sup> CD33 <sup>+</sup> HLA-DR <sup>+</sup> DAF-FM <sup>lo</sup>                   | Dendritic Cell                               | 0.113995          | 1.299486003    | <b>Cox.4</b> , exp(coef) = 0.420, p = 0.023, p.adjust = 0.216                                                                                                                                                                                                                                                                                                                                       |
| 85   | HLA-DR <sup>+</sup> DAF-FM <sup>lo</sup>                                                                           | -                                            | 0.113271          | 1.283031944    | <b>Cox.4</b> , exp(coef) = 0.543, p = 0.029, p.adjust = 0.216                                                                                                                                                                                                                                                                                                                                       |
| 137  | HLA-DR <sup>+</sup> CD33 <sup>+</sup> CD11b <sup>+</sup> CD11c <sup>+</sup> CD14 <sup>+</sup> DAF-FM <sup>lo</sup> | Monocyte derived dendritic cell vs Monocytic | 0.112484          | 1.265265026    | <b>Cox.1</b> , exp(coef) = 1.873, p = 0.039, p.adjust = 0.552;<br><b>Wilc.1</b> , RFS(<1yr, mean = -9.877, SD = 0.992), RFS(>1yr, mean = -10.522, SD = 0.778), p = 0.038, p.adjust = 0.986, qvalue = 0.986;<br><b>Cox.4</b> , exp(coef) = 0.492, p = 0.009, p.adjust = 0.216<br><b>Wilc.4</b> , RFS(<1yr, median = -0.618), RFS(>1yr, median = -0.011), p = 0.041, p.adjust = 0.869, qvalue = 0.862 |
| 105  | CD11b <sup>+</sup> CD11c <sup>+</sup> CD33 <sup>+</sup> HLA-DR <sup>+</sup> DAF-FM <sup>lo</sup>                   | -                                            | 0.11192           | 1.25260864     | <b>Cox.4</b> , exp(coef) = 0.643, p = 0.033, p.adjust = 0.216                                                                                                                                                                                                                                                                                                                                       |
| 179  | CD11b <sup>+</sup> CD11c <sup>+</sup> CD33 <sup>+</sup> HLA-DR <sup>+</sup> DAF-FM <sup>lo</sup>                   | -                                            | 0.111773          | 1.249320353    | <b>Cox.1</b> , exp(coef) = 2.539, p = 0.036, p.adjust = 0.55;<br><b>Cox.4</b> , exp(coef) = 0.515, p = 0.045, p.adjust = 0.239                                                                                                                                                                                                                                                                      |
| 32   | CD33 <sup>+</sup> CD11b <sup>+</sup> CD11c <sup>+</sup> CD14 <sup>+</sup> HLA-DR <sup>+</sup> DAF-FM <sup>lo</sup> | Monocytic                                    | 0.111466          | 1.242466916    | <b>Cox.4</b> , exp(coef) = 0.492, p = 0.022, p.adjust = 0.216                                                                                                                                                                                                                                                                                                                                       |
| 5    | CD11b <sup>+</sup> CD11c <sup>+</sup> CD33 <sup>+</sup> HLA-DR <sup>+</sup> DAF-FM <sup>lo</sup>                   | Dendritic Cell                               | 0.11092           | 1.23032464     | NS                                                                                                                                                                                                                                                                                                                                                                                                  |
| 116  | HLA-DR <sup>+</sup> DAF-FM <sup>lo</sup>                                                                           | -                                            | 0.110547          | 1.222063921    | NS                                                                                                                                                                                                                                                                                                                                                                                                  |
| 95   | HLA-DR <sup>+</sup> DAF-FM <sup>lo</sup>                                                                           | -                                            | 0.109515          | 1.199353523    | <b>Cox.1</b> , exp(coef) = 2.029, p = 0.028, p.adjust = 0.552                                                                                                                                                                                                                                                                                                                                       |
| 12   | CD11b <sup>+</sup> CD11c <sup>+</sup> CD33 <sup>+</sup> HLA-DR <sup>+</sup> DAF-FM <sup>+</sup>                    | Dendritic Cell                               | 0.109478          | 1.198543248    | NS                                                                                                                                                                                                                                                                                                                                                                                                  |
| 195  | CD11c <sup>+</sup> CD11b <sup>+</sup> HLA-DR <sup>+</sup> DAF-FM <sup>lo</sup>                                     | Dendritic Cell                               | 0.109477          | 1.198521353    | <b>Cox.1</b> , exp(coef) = 1.821, p = 0.034, p.adjust = 0.552;<br><b>Cox.4</b> , exp(coef) = 0.489, p = 0.004, p.adjust = 0.216                                                                                                                                                                                                                                                                     |
| 164  | DAF-FM <sup>lo</sup>                                                                                               | -                                            | 0.108955          | 1.187119203    | NS                                                                                                                                                                                                                                                                                                                                                                                                  |
| 64   | CD11b <sup>+</sup> CD11c <sup>+</sup> CD33 <sup>+</sup> HLA-DR <sup>+</sup> DAF-FM <sup>lo</sup>                   | Dendritic Cell                               | 0.10849           | 1.17700801     | <b>Cox.4</b> , exp(coef) = 0.439, p = 0.017, p.adjust = 0.216                                                                                                                                                                                                                                                                                                                                       |
| 3    | CD11b <sup>+</sup> CD11c <sup>+</sup> HLA-DR <sup>+</sup> DAF-FM <sup>lo</sup>                                     | Dendritic Cell                               | 0.107908          | 1.164413646    | NS                                                                                                                                                                                                                                                                                                                                                                                                  |
| 96   | HLA-DR <sup>+</sup> DAF-FM <sup>lo</sup>                                                                           | -                                            | 0.107873          | 1.163658413    | <b>Cox.4</b> , exp(coef) = 0.593, p = 0.022, p.adjust = 0.216                                                                                                                                                                                                                                                                                                                                       |
| 43   | DAF-FM <sup>lo</sup>                                                                                               | -                                            | 0.107706          | 1.160058244    | <b>Cox.1</b> , exp(coef) = 2.538, p = 0.015, p.adjust = 0.446                                                                                                                                                                                                                                                                                                                                       |
| 190  | CD11b <sup>+</sup> HLA-DR <sup>+</sup> DAF-FM <sup>lo</sup>                                                        | -                                            | 0.107361          | 1.152638432    | <b>Cox.2</b> , exp(coef) = 0.347, p = 0.028, p.adjust = 0.940;<br><b>Wilc.2</b> , RFS(<1yr, mean = -11.425, SD = 0.612), RFS(>1yr, mean = -10.904, SD = 0.638), p = 0.046, p.adjust = 0.999, qvalue = 0.999<br><b>Cox.4</b> , exp(coef) = 0.527, p = 0.020, p.adjust = 0.216                                                                                                                        |
| 153  | CD33 <sup>+</sup> CD11b <sup>+</sup> CD11c <sup>+</sup> HLA-DR <sup>+</sup> DAF-FM <sup>lo</sup>                   | Dendritic Cell                               | 0.107337          | 1.152123157    | <b>Cox.4</b> , exp(coef) = 0.452, p = 0.038, p.adjust = 0.216                                                                                                                                                                                                                                                                                                                                       |
| 47   | CD33 <sup>+</sup> CD11b <sup>+</sup> CD11c <sup>+</sup> CD14 <sup>+</sup> HLA-DR <sup>+</sup> DAF-FM <sup>lo</sup> | Dendritic Cell                               | 0.107156          | 1.148240834    | <b>Cox.1</b> , exp(coef) = 1.882, p = 0.037, p.adjust = 0.552;<br><b>Cox.4</b> , exp(coef) = 0.599, p = 0.036, p.adjust = 0.216                                                                                                                                                                                                                                                                     |
| 62   | HLADR <sup>+</sup> DAF-FM <sup>lo</sup>                                                                            | -                                            | 0.106869          | 1.142098316    | NS                                                                                                                                                                                                                                                                                                                                                                                                  |
| 114  | CD11b <sup>+</sup> CD11c <sup>+</sup> DAF-FM <sup>lo</sup>                                                         | Antigen Presentation Cell                    | 0.105949          | 1.12251906     | <b>Wilc.3</b> , Mean = 0.316, p = 0.017, p.adjust = 0.332                                                                                                                                                                                                                                                                                                                                           |
| 177  | CD11c <sup>+</sup> HLA-DR <sup>+</sup> DAF-FM <sup>lo</sup>                                                        | -                                            | 0.104785          | 1.097989623    | <b>Cox.4</b> , exp(coef) = 0.540, p = 0.013, p.adjust = 0.216                                                                                                                                                                                                                                                                                                                                       |
| 59   | CD11c <sup>+</sup> HLA-DR <sup>+</sup> DAF-FM <sup>lo</sup>                                                        | -                                            | 0.10412           | 1.08409744     | <b>Cox.1</b> , exp(coef) = 2.769, p = 0.014, p.adjust = 0.446                                                                                                                                                                                                                                                                                                                                       |
| 188  | CD11b <sup>+</sup> CD11c <sup>+</sup> CD33 <sup>+</sup> HLA-DR <sup>+</sup> DAF-FM <sup>lo</sup>                   | Dendritic Cell                               | 0.103986          | 1.08130882     | NS                                                                                                                                                                                                                                                                                                                                                                                                  |
| 89   | CD11b <sup>+</sup> HLA-DR <sup>+</sup> DAF-FM <sup>lo</sup>                                                        | -                                            | 0.10368           | 1.07495424     | <b>Cox.1</b> , exp(coef) = 1.918, p = 0.037, p.adjust = 0.552;<br><b>Cox.4</b> , exp(coef) = 0.636, p = 0.042, p.adjust = 0.233                                                                                                                                                                                                                                                                     |
| 18   | CD11b <sup>+</sup> CD11c <sup>+</sup> CD33 <sup>+</sup> CD14 <sup>+</sup> HLA-DR <sup>+</sup> DAF-FM <sup>+</sup>  | Monocytic                                    | 0.103656          | 1.074456634    | <b>Cox.4</b> , exp(coef) = 0.610, p = 0.023, p.adjust = 0.216                                                                                                                                                                                                                                                                                                                                       |
| 120  | HLA-DR <sup>+</sup> DAF-FM <sup>lo</sup>                                                                           | -                                            | 0.103652          | 1.07437371     | <b>Cox.1</b> , exp(coef) = 2.208, p = 0.013, p.adjust = 0.446                                                                                                                                                                                                                                                                                                                                       |
| 86   | CD11b <sup>+</sup> CD11c <sup>+</sup> CD33 <sup>+</sup> HLA-DR <sup>+</sup> DAF-FM <sup>lo</sup>                   | Antigen Presentation Cell                    | 0.10362           | 1.07371044     | <b>Cox.4</b> , exp(coef) = 0.425, p = 0.027, p.adjust = 0.216                                                                                                                                                                                                                                                                                                                                       |
| 40   | CD11b <sup>+</sup> CD11c <sup>+</sup> HLA-DR <sup>+</sup> DAF-FM <sup>lo</sup>                                     | -                                            | 0.10355           | 1.07226025     | <b>Cox.1</b> , exp(coef) = 2.468, p = 0.011, p.adjust = 0.446<br><b>Cox.4</b> , exp(coef) = 0.502, p = 0.138, p.adjust = 0.216                                                                                                                                                                                                                                                                      |
| 10   | CD11b <sup>+</sup> CD11c <sup>+</sup> HLA-DR <sup>+</sup> DAF-FM <sup>lo</sup>                                     | Early Antigen Presentation Cell              | 0.10319           | 1.06481761     | <b>Wilc.3</b> , Mean = 0.315, p = 0.042, p.adjust = 0.401                                                                                                                                                                                                                                                                                                                                           |
| 24   | CD11b <sup>+</sup> HLA-DR <sup>+</sup> DAF-FM <sup>lo</sup>                                                        | -                                            | 0.103015          | 1.061209023    | <b>Cox.1</b> , exp(coef) = 2.220, p = 0.013, p.adjust = 0.446                                                                                                                                                                                                                                                                                                                                       |
| 78   | CD11b <sup>+</sup> CD11c <sup>+</sup> CD33 <sup>+</sup> CD14 <sup>+</sup> HLA-DR <sup>+</sup> DAF-FM <sup>lo</sup> | Monocytic                                    | 0.102856          | 1.057935674    | <b>Wilc.1</b> , RFS(<1yr, mean = -9.348, SD = 0.851), RFS(>1yr, mean = -10.140, SD = 1.179), p = 0.033, p.adjust = 0.986, qvalue = 0.986<br><b>Cox.4</b> , exp(coef) = 0.643, p = 0.029, p.adjust = 0.216;<br><b>Wilc.4</b> , RFS(<1yr, median = -1.289), RFS(>1yr, median = -0.243), p = 0.037, p.adjust = 0.869, qvalue = 0.862                                                                   |
| 160  | CD11b <sup>+</sup> CD11c <sup>+</sup> CD33 <sup>+</sup> HLA-DR <sup>+</sup> DAF-FM <sup>lo</sup>                   | -                                            | 0.102155          | 1.043564403    | <b>Wilc.2</b> , RFS(<1yr, mean = -9.984, SD = 0.359), RFS(>1yr, mean = -9.335, SD = 0.831), p = 0.022, p.adjust = 0.999, qvalue = 0.999;<br><b>Cox.4</b> , exp(coef) = 0.548, p = 0.034, p.adjust = 0.216                                                                                                                                                                                           |
| 155  | CD33 <sup>+</sup> CD11b <sup>+</sup> CD11c <sup>+</sup> HLA-DR <sup>+</sup> DAF-FM <sup>lo</sup>                   | Plasmacytoid DC (CD11b <sup>-</sup> /lo)     | 0.101804          | 1.036405442    | <b>Cox.4</b> , exp(coef) = 0.450, p = 0.021, p.adjust = 0.216<br><b>Wilc.4</b> , RFS(<1yr, median = -0.787), RFS(>1yr, median = -0.050), p = 0.019, p.adjust = 0.869, qvalue = 0.862                                                                                                                                                                                                                |
| 34   | CD11b <sup>+</sup> CD11c <sup>+</sup> CD33 <sup>+</sup> HLA-DR <sup>+</sup> DAF-FM <sup>lo</sup>                   | MDSC                                         | 0.101436          | 1.02892621     | NS                                                                                                                                                                                                                                                                                                                                                                                                  |
| 189  | CD11b <sup>+</sup> CD11c <sup>+</sup> HLA-DR <sup>+</sup> DAF-FM <sup>lo</sup>                                     | -                                            | 0.100894          | 1.017959924    | <b>Cox.1</b> , exp(coef) = 2.779, p = 0.016, p.adjust = 0.446;<br><b>Cox.4</b> , exp(coef) = 0.256, p = 0.005, p.adjust = 0.216                                                                                                                                                                                                                                                                     |
| 172  | CD11b <sup>+</sup> HLA-DR <sup>+</sup> DAF-FM <sup>lo</sup>                                                        | -                                            | 0.100434          | 1.008698836    | NS                                                                                                                                                                                                                                                                                                                                                                                                  |

Table S7d. Representing nodes of PCA analysis of myeloid population (post-pre):

| Node | Phenotype                                                                                                                         | Cell Type      | $\lambda$ , (PC1) | % in Component | Statistics                                                                                                                                                                                                  |
|------|-----------------------------------------------------------------------------------------------------------------------------------|----------------|-------------------|----------------|-------------------------------------------------------------------------------------------------------------------------------------------------------------------------------------------------------------|
| 23   | CD11b <sup>+lo</sup> CD11c <sup>-lo</sup> HLA-DR <sup>+lo</sup> DAF-FM <sup>+lo</sup>                                             | -              | -0.108298         | 1.17284568     | NS                                                                                                                                                                                                          |
| 44   | CD11c <sup>+lo</sup> CD11b <sup>+lo</sup> CD33 <sup>-lo</sup> HLA-DR <sup>+lo</sup> DAF-FM <sup>-lo</sup>                         | -              | -0.107762         | 1.161264864    | NS                                                                                                                                                                                                          |
| 183  | CD11b <sup>+lo</sup> CD11c <sup>+lo</sup> CD15 <sup>- or -lo</sup> CD33 <sup>-lo</sup> HLADR <sup>+lo</sup> DAF-FM <sup>-lo</sup> | Dendritic Cell | -0.107233         | 1.149891629    | NS                                                                                                                                                                                                          |
| 113  | CD11b <sup>+</sup> C11c <sup>-lo</sup> HLA-DR <sup>-lo</sup> DAF-FM <sup>+lo</sup>                                                | -              | -0.106954         | 1.143915812    | NS                                                                                                                                                                                                          |
| 179  | CD11b <sup>-lo or +lo</sup> CD11c <sup>-lo or +lo</sup> CD33 <sup>-lo</sup> HLA-DR <sup>-lo or +lo</sup> DAF-FM <sup>-lo</sup>    | MDSC           | 0.111773          | 1.249320353    | <b>Cox.1</b> , exp(coef) = 2.539 , p = 0.036 , p.adjust = 0.55;<br><b>Cox.4</b> , exp(coef) = 0.515 , p = 0.045 , p.adjust = 0.239                                                                          |
| 59   | CD11c <sup>- or -lo</sup> HLA-DR <sup>- or -lo</sup> DAF-FM <sup>-lo</sup>                                                        | -              | 0.10412           | 1.08409744     | <b>Cox.1</b> , exp(coef) = 2.769 , p = 0.014 , p.adjust = 0.446                                                                                                                                             |
| 24   | CD11b <sup>- or -lo</sup> HLA-DR <sup>- or -lo</sup> DAF-FM <sup>- or -lo</sup>                                                   | -              | 0.103015          | 1.061209023    | <b>Cox.1</b> , exp(coef) = 2.220 , p = 0.013 , p.adjust = 0.446                                                                                                                                             |
| 67   | CD11b <sup>+</sup> CD11c <sup>+</sup> HLA-DR <sup>-lo</sup> DAF-FM <sup>+</sup>                                                   | Dendritic Cell | 0.105253          | 1.107819401    | <b>Cox.4</b> , exp(coef) = 1.549 , p = 0.020 , p.adjust = 0.216                                                                                                                                             |
| 43   | DAF-FM <sup>-lo</sup>                                                                                                             | -              | -0.105049         | 1.10352924     | <b>Cox.1</b> , exp(coef) = 2.538 , p = 0.015 , p.adjust = 0.446                                                                                                                                             |
| 111  | CD11b <sup>+</sup> CD11c <sup>+lo</sup> CD33 <sup>-lo or +lo</sup> HLA-DR <sup>+ or +lo</sup> DAF-FM <sup>-lo</sup>               | Dendritic Cell | 0.113995          | 1.299486003    | <b>Cox.4</b> , exp(coef) = 0.420 , p = 0.023 , p.adjust = 0.216                                                                                                                                             |
| 64   | CD11b <sup>+</sup> CD11c <sup>+</sup> CD33 <sup>-lo</sup> HLA-DR <sup>-lo</sup> DAF-FM <sup>-lo or +lo</sup>                      | Dendritic Cell | 0.10849           | 1.17700801     | <b>Cox.4</b> , exp(coef) = 0.439 , p = 0.017 , p.adjust = 0.216                                                                                                                                             |
| 199  | CD11b <sup>+</sup> CD11c <sup>+</sup> CD33 <sup>+lo</sup> CD14 <sup>-lo</sup> HLA-DR <sup>+</sup> DAF-FM <sup>-lo</sup>           | Dendritic Cell | 0.114277          | 1.305923273    | NS                                                                                                                                                                                                          |
| 45   | DAF-FM <sup>+</sup>                                                                                                               | -              | 0.104049          | 1.08261944     | <b>Cox.4</b> , exp(coef) = 2.391 , p = 0.006 , p.adjust = 0.216                                                                                                                                             |
| 195  | CD11c <sup>+</sup> CD11b <sup>+lo</sup> HLA-DR <sup>+</sup> DAF-FM <sup>-lo</sup>                                                 | Dendritic Cell | 0.109477          | 1.198521353    | <b>Cox.1</b> , exp(coef) = 1.821 , p = 0.034 , p.adjust = 0.552;<br><b>Cox.4</b> , exp(coef) = 0.489 , p = 0.004 , p.adjust = 0.216                                                                         |
| 172  | CD11b <sup>+lo</sup> HLA-DR <sup>+lo</sup> DAF-FM <sup>-lo</sup>                                                                  | -              | 0.100434          | 1.008698836    | NS                                                                                                                                                                                                          |
| 34   | CD11b <sup>+</sup> CD11c <sup>+lo</sup> CD33 <sup>-lo or +lo</sup> HLA-DR <sup>-lo</sup> DAF-FM <sup>+lo</sup>                    | MDSC           | 0.101436          | 1.02892621     | NS                                                                                                                                                                                                          |
| 160  | CD11b <sup>+lo</sup> CD11c <sup>+</sup> CD33 <sup>-lo</sup> HLA-DR <sup>+</sup> DAF-FM <sup>-lo or +lo</sup>                      | Dendritic Cell | 0.102155          | 1.043564403    | <b>Wilc.2</b> , RFS(<1yr, mean = -9.984, SD = 0.359), RFS(>1yr, mean = -9.335, SD = 0.831), p = 0.022, p.adjust = 0.999, qvalue = 0.999;<br><b>Cox.4</b> , exp(coef) = 0.548 , p = 0.034 , p.adjust = 0.216 |
| 5    | CD11b <sup>+</sup> CD11c <sup>+</sup> CD33 <sup>+lo</sup> HLA-DR <sup>+</sup> DAF-FM <sup>-lo</sup>                               | Dendritic Cell | 0.11092           | 1.23032464     | NS                                                                                                                                                                                                          |
| 95   | HLA-DR <sup>-lo or +lo</sup> DAF-FM <sup>-lo</sup>                                                                                | -              | 0.109515          | 1.199353523    | <b>Cox.1</b> , exp(coef) = 2.029 , p = 0.028 , p.adjust = 0.552                                                                                                                                             |
| 86   | CD11b <sup>+</sup> CD11c <sup>+</sup> CD33 <sup>-lo</sup> HLA-DR <sup>+lo</sup> DAF-FM <sup>-lo</sup>                             | Dendritic Cell | 0.10362           | 1.07371044     | <b>Cox.4</b> , exp(coef) = 0.425 , p = 0.027 , p.adjust = 0.216                                                                                                                                             |
| 50   | CD11b <sup>+lo</sup> CD11c <sup>-lo</sup> HLADR <sup>-lo</sup> DAF-FM <sup>+lo</sup>                                              | -              | -0.100639         | 1.012820832    | NS                                                                                                                                                                                                          |
| 32   | CD33 <sup>+</sup> CD11b <sup>+</sup> CD11c <sup>+</sup> CD14 <sup>+</sup> HLA-DR <sup>+</sup> DAF-FM <sup>+lo</sup>               | Monocytic      | 0.111466          | 1.242466916    | <b>Cox.4</b> , exp(coef) = 0.492 , p = 0.022 , p.adjust = 0.216                                                                                                                                             |
| 188  | CD11b <sup>+lo</sup> CD11c <sup>+lo</sup> CD33 <sup>-lo</sup> HLA-DR <sup>+lo</sup> DAF-FM <sup>-lo</sup>                         | Dendritic Cell | 0.103986          | 1.08130882     | NS                                                                                                                                                                                                          |

Table S8a. Representing nodes of PLS analysis of lymphoid population prior to treatment:

| Node | Phenotype                                                                                                                       | Cell Type                   | W <sub>1</sub> |
|------|---------------------------------------------------------------------------------------------------------------------------------|-----------------------------|----------------|
| 44   | CD3 <sup>+</sup> CD8 <sup>+</sup> CD127 <sup>+/lo</sup> DAF-FM <sup>+</sup>                                                     | Effector CD8+ T cell        | -0.180858      |
| 121  | CD11c <sup>+</sup> CD56 <sup>-/lo</sup> CD25 <sup>+/lo</sup> DAF-FM <sup>+/lo</sup>                                             | Antigen Presentation cell   | -0.0863652     |
| 8    | CD3 <sup>+</sup> CD56 <sup>+/lo</sup> CD127 <sup>+/lo</sup> CD11c <sup>- or -/lo</sup> CD25 <sup>-/lo</sup> DAF-FM <sup>+</sup> | NK-like cell                | 0.169409       |
| 175  | CD3 <sup>+</sup> CD4 <sup>+</sup> CD127 <sup>+</sup> CD25 <sup>-/lo or +/lo</sup> DAF-FM <sup>+</sup>                           | Effector memory T cell      | 0.161053       |
| 145  | CD3 <sup>+</sup> CD4 <sup>+</sup> CD127 <sup>+</sup> CD25 <sup>-/lo</sup> DAF-FM <sup>+</sup>                                   | CD4+ Effector memory T cell | 0.153607       |
| 105  | CD3 <sup>+</sup> CD8 <sup>+</sup> CD127 <sup>+/lo</sup> CD25 <sup>-/lo</sup> DAF-FM <sup>+</sup>                                | Effector CD8 T cell         | -0.152812      |
| 36   | CD3 <sup>+</sup> CD127 <sup>+/lo</sup> DAF-FM <sup>+</sup>                                                                      | alphabeta transitioning     | 0.151402       |
| 187  | CD127 <sup>-/lo</sup> CD4 <sup>-/lo</sup> CD11c <sup>+/lo</sup> CD25 <sup>+/lo</sup> DAF-FM <sup>+</sup>                        | Antigen Presentation cell   | -0.148933      |

Table S8b. Representing nodes of PLS analysis of lymphoid population post treatment:

| Node | Phenotype                                                                                                                | Cell Type                 | W <sub>1</sub> |
|------|--------------------------------------------------------------------------------------------------------------------------|---------------------------|----------------|
| 44   | CD3 <sup>+</sup> CD8 <sup>+</sup> CD127 <sup>+/lo</sup> DAF-FM <sup>+</sup>                                              | Effector CD8 T cell       | -0.194458      |
| 103  | CD3 <sup>+</sup> CD8 <sup>+</sup> CD56 <sup>+/lo</sup> CD11c <sup>+/lo</sup> CD25 <sup>-/lo</sup> DAF-FM <sup>+/lo</sup> | NK-like cell              | 0.180444       |
| 105  | CD3 <sup>+</sup> CD8 <sup>+</sup> CD127 <sup>+/lo</sup> CD25 <sup>-/lo</sup> DAF-FM <sup>+</sup>                         | Effector CD8 T cell       | -0.175536      |
| 190  | CD3 <sup>+</sup> CD56 <sup>+</sup> CD8 <sup>+</sup> CD11c <sup>-/lo</sup> DAF-FM <sup>-/lo</sup>                         | NK-like cell              | 0.171347       |
| 77   | CD11c <sup>+/lo</sup> CD25 <sup>-/lo</sup> DAF-FM <sup>+/lo</sup>                                                        | Antigen presentation cell | -0.160882      |
| 187  | CD127 <sup>-/lo</sup> CD4 <sup>-/lo</sup> CD11c <sup>+/lo</sup> CD25 <sup>+/lo</sup> DAF-FM <sup>+</sup>                 | Antigen presentation cell | -0.15396       |
| 16   | CD11c <sup>+/lo</sup> CD25 <sup>+/lo</sup> DAF-FM <sup>+</sup>                                                           | Antigen presentation cell | -0.153146      |
| 121  | CD11c <sup>+</sup> CD56 <sup>-/lo</sup> CD25 <sup>+/lo</sup> DAF-FM <sup>+/lo</sup>                                      | Antigen presentation cell | -0.151428      |
| 176  | CD3 <sup>+</sup> CD8 <sup>+</sup> CD127 <sup>+</sup> CD11c <sup>-/lo</sup> CD25 <sup>+/lo</sup> DAF-FM <sup>+</sup>      | Effector CD8 T cell       | -0.151061      |
| 53   | CD3 <sup>+</sup> CD8 <sup>+</sup> CD127 <sup>+/lo</sup> DAF-FM <sup>+</sup>                                              | Effector CD8 T cell       | -0.147241      |
| 14   | CD3 <sup>+</sup> CD8 <sup>+</sup> CD127 <sup>-/lo</sup> CD25 <sup>- or -/lo</sup> DAF-FM <sup>+</sup>                    | Effector CD8 T cell       | -0.143333      |
| 57   | CD11c <sup>+/lo</sup> CD127 <sup>-</sup> CD25 <sup>+/lo or -/lo</sup> DAF-FM <sup>+/lo</sup>                             | Antigen presentation cell | -0.142374      |

Table S8c. Representing nodes of PLS analysis of myeloid population prior to treatment:

| Node | Phenotype                                                     | Cell Type | $W_1$    |
|------|---------------------------------------------------------------|-----------|----------|
| 122  | CD11b <sup>+</sup> or <sup>+/lo</sup> DAF-FM <sup>+</sup>     | -         | 0.157069 |
| 166  | CD11b <sup>+</sup> HLA-DR <sup>+/lo</sup> DAF-FM <sup>+</sup> | -         | 0.144365 |

Table S8d. Representing nodes of PLS analysis of myeloid population post treatment:

| Node | Phenotype                                                                                                        | Cell Type                 | W <sub>1</sub> |
|------|------------------------------------------------------------------------------------------------------------------|---------------------------|----------------|
| 130  | CD11b <sup>+/lo</sup> CD33 <sup>- or -/lo</sup> CD11c <sup>+/lo</sup> HLA-DR <sup>+/lo</sup> DAF-FM <sup>+</sup> | Antigen Presentation cell | -0.203375      |
| 36   | CD11b <sup>+</sup> CD11c <sup>+</sup> HLA-DR <sup>-/lo or +/lo</sup> DAF-FM <sup>+</sup>                         | MDSC                      | 0.159404       |
| 122  | CD11b <sup>+ or +/lo</sup> DAF-FM <sup>+</sup>                                                                   | CD11b <sup>+</sup> cells  | 0.15678        |
| 25   | CD11b <sup>+</sup> CD11c <sup>-/lo</sup> HLA-DR <sup>+/lo</sup> DAF-FM <sup>+</sup>                              | CD11b <sup>+</sup> cells  | 0.154601       |
| 42   | CD11b <sup>+</sup> CD11c <sup>+/lo</sup> HLA-DR <sup>-/lo</sup> DAF-FM <sup>+</sup>                              | Antigen Presentation cell | 0.150295       |
| 193  | HLA-DR <sup>+</sup> DAF-FM <sup>+</sup>                                                                          | MHCII positive cell       | 0.148774       |
| 200  | DAF-FM <sup>-/lo</sup>                                                                                           | -                         | -0.146963      |
| 163  | CD11b <sup>+/lo</sup> CD11c <sup>- or -/lo</sup> HLA-DR <sup>+</sup> DAF-FM <sup>+</sup>                         | CD11b <sup>+</sup> cells  | 0.144359       |

**Table S9. FoxP3<sup>+</sup> cells among CD3<sup>+</sup>CD4<sup>+</sup>CD25<sup>+</sup>CD127<sup>lo</sup> population (Node 159):**

| <b>Sample</b> | <b>RFS</b> | <b>% FoxP3<sup>+</sup> Cells</b> | <b>Total events</b> |
|---------------|------------|----------------------------------|---------------------|
| 15 post       | 91         | 97.12                            | 1920                |
| 15 pre        | 91         | 90.97                            | 1512                |
| 25 post       | 137        | 90.47                            | 1319                |
| 25 pre        | 137        | 92.39                            | 1214                |
| 30 post       | 176        | 95.51                            | 1361                |
| 30 pre        | 176        | 85.51                            | 1103                |
| 32 post       | 1023       | 89.95                            | 1540                |
| 32 pre        | 1023       | 99.04                            | 310                 |
| 26 post       | 1155       | 86.12                            | 1775                |
| 26 pre        | 1155       | 86.47                            | 1343                |
| 35 post       | 1518       | 93.96                            | 746                 |
| 35 pre        | 1518       | 91.1                             | 1793                |
| 11 post       | 1548       | 94.41                            | 846                 |
| 11 pre        | 1548       | 90.14                            | 1448                |
